# Supplementary material for: Temperature-modulated selective C(sp3)–H or C(sp2)–H arylation through palladium catalysis
Source: Royal Society of Chemistry journal article supplement (doi:10.1039/d0sc02328k), 2020-01-01

# Temperature-Modulated Selective C(sp<sup>3</sup>)-H or C(sp<sup>2</sup>)-H Arylation through Palladium Catalysis

Thirupathi Gogula<sup>†</sup>, Jinquan Zhang<sup>†</sup>, Madhava Reddy Lonka, Shuaizhong Zhang and Hongbin Zou<sup>\*</sup>

*College of Pharmaceutical Sciences, Zhejiang University, Hangzhou, 310058, P. R. China.*

E-mail: zouhb@zju.edu.cn

## Table of Contents

|                                                                                                       |            |
|-------------------------------------------------------------------------------------------------------|------------|
| <b>1. General Information .....</b>                                                                   | <b>S2</b>  |
| <b>2. General Procedure for the Preparation of Substrates.....</b>                                    | <b>S2</b>  |
| <b>3. Optimization of Reaction Conditions.....</b>                                                    | <b>S2</b>  |
| <b>4. General Procedure for C(sp<sup>3</sup>)-H and C(sp<sup>2</sup>)-H Arylation Reactions .....</b> | <b>S5</b>  |
| <b>5. Characterization Data for the Substrates and the Products.....</b>                              | <b>S6</b>  |
| <b>6. Mechanistic Studies .....</b>                                                                   | <b>S23</b> |
| <b>7. X-ray Crystallographic Data .....</b>                                                           | <b>S31</b> |
| <b>8. References .....</b>                                                                            | <b>S35</b> |
| <b>9. NMR Spectra.....</b>                                                                            | <b>S36</b> |

## 1. General Information

Catalytic reactions were carried out in sealed tubes using pre-dried glassware. 7-Pyridyl-pyrazolo[1,5-a]pyrimidines were synthesized according to reported procedures.<sup>1</sup> Unless otherwise noted, all the commercial material was used without further purification. Column chromatography purifications were performed using 200–300 mesh silica gel. NMR spectra were mostly recorded for <sup>1</sup>H NMR at 500 MHz and for <sup>13</sup>C NMR at 125 MHz. CDCl<sub>3</sub> were used as solvent. All chemical shifts are given as  $\delta$  value (ppm) with reference to tetramethylsilane (TMS) as an internal standard. The following abbreviations are used to explain peak patterns: br = broad, s = singlet, d = doublet, t = triplet, q = quartet, m = multiplet. Coupling constants (*J*) are reported in Hertz (Hz). High resolution mass spectroscopy (HRMS) data of the products were collected on an Agilent Technologies 6224 TOF LC/MS apparatus (ESI).

## 2. General Procedure for the Preparation of Substrates (GP1)

Following a modified procedure,<sup>1</sup> a mixture of  $\beta$ -enaminone (1.0 mmol) and *NH*-5-aminopyrazole (1.0 mmol) was heated to 180 °C for 60 min in a sealed tube containing a 2yridi-coated magnetic stirring bar. The resulting reaction mixture was cooled to room temperature, and the precipitated product formed upon the addition of cold EtOH/H<sub>2</sub>O (1:1) was filtered off, washed and dried to afford the pure 7-Pyridyl-pyrazolo[1, 5-a]pyrimidines **1**.

## 3. Optimization of Reaction Conditions

Table S1. Screening of Silver Additives<sup>a,b</sup>

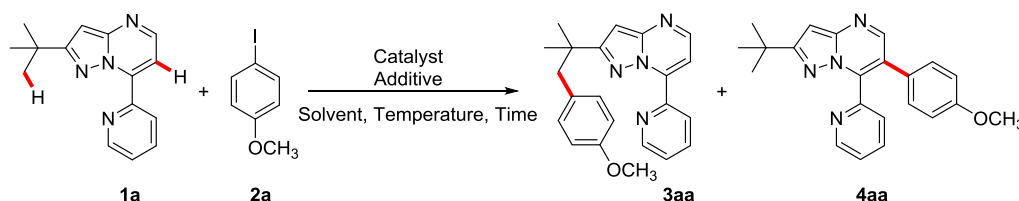

| entry          | catalyst             | solvent | additive                                                  | T ( °C) | time (h) | yield (%) |     |
|----------------|----------------------|---------|-----------------------------------------------------------|---------|----------|-----------|-----|
|                |                      |         |                                                           |         |          | 3aa       | 4aa |
| 1              | Pd(OAc) <sub>2</sub> | AcOH    | AgTFA                                                     | 120     | 24       | 18        | 6   |
| 2              | Pd(OAc) <sub>2</sub> | AcOH    | AgOAc                                                     | 120     | 24       | 11        | <5  |
| 3              | Pd(OAc) <sub>2</sub> | AcOH    | Ag <sub>2</sub> CO <sub>3</sub>                           | 120     | 24       | 13        | <5  |
| 4              | Pd(OAc) <sub>2</sub> | AcOH    | AgF                                                       | 120     | 24       | 8         | <5  |
| 5 <sup>c</sup> | Pd(OAc) <sub>2</sub> | HFIP    | AgBr/(NMe <sub>4</sub> )OC(CF <sub>3</sub> ) <sub>3</sub> | 120     | 36       | 0         | 0   |
| 6 <sup>c</sup> | Pd(OAc) <sub>2</sub> | HFIP    | AgBr/(NMe <sub>4</sub> )OC(CF <sub>3</sub> ) <sub>3</sub> | 140     | 48       | 0         | 0   |

<sup>a</sup>Reaction conditions: **1a** (1.0 mmol), **2a** (1.5 mmol), Pd(OAc)<sub>2</sub> (10 mol %), Additive (1.5 mmol), AcOH (3 mL). <sup>b</sup>Isolated Yield. <sup>c</sup> Pd(OAc)<sub>2</sub> (5 mol %), AgBr (2.0 mmol), NMe<sub>4</sub>)OC(CF<sub>3</sub>)<sub>3</sub> (2.0 mmol).

**Table S2. Screening of Solvents<sup>a,b</sup>**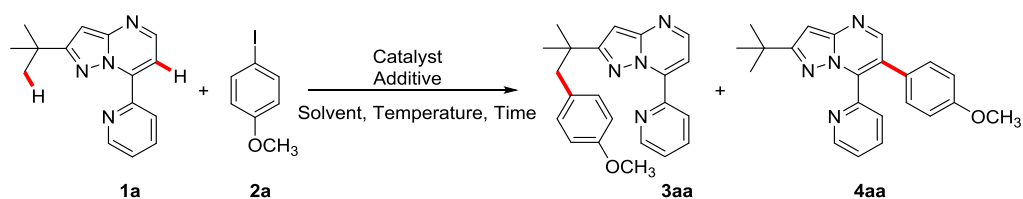

| entry | catalyst             | solvent          | additive | T ( °C) | time (h) | yield (%)  |            |
|-------|----------------------|------------------|----------|---------|----------|------------|------------|
|       |                      |                  |          |         |          | <b>3aa</b> | <b>4aa</b> |
| 1     | Pd(OAc) <sub>2</sub> | HFIP/AcOH (1:1)  | AgTFA    | 120     | 24       | 24         | 18         |
| 2     | Pd(OAc) <sub>2</sub> | HFIP/AcOH (6:4)  | AgTFA    | 120     | 24       | 33         | 14         |
| 3     | Pd(OAc) <sub>2</sub> | HFIP/AcOH (9:1)  | AgTFA    | 120     | 24       | 46         | 10         |
| 4     | Pd(OAc) <sub>2</sub> | HFIP             | AgTFA    | 120     | 24       | 58         | <5         |
| 5     | Pd(OAc) <sub>2</sub> | TFE <sup>c</sup> | AgTFA    | 120     | 24       | 36         | 8          |
| 6     | Pd(OAc) <sub>2</sub> | DCE              | AgTFA    | 120     | 24       | <5         | <5         |

<sup>a</sup>Reaction conditions: **1a** (1.0 mmol), **2a** (1.5 mmol), Pd(OAc)<sub>2</sub> (10 mol %), AgTFA (1.5 mmol), Solvent (3 mL). <sup>b</sup>Isolated Yield. <sup>c</sup>2,2,2-trifluoroethanol.

**Table S3. Screening of Palladium Catalysts<sup>a,b</sup>**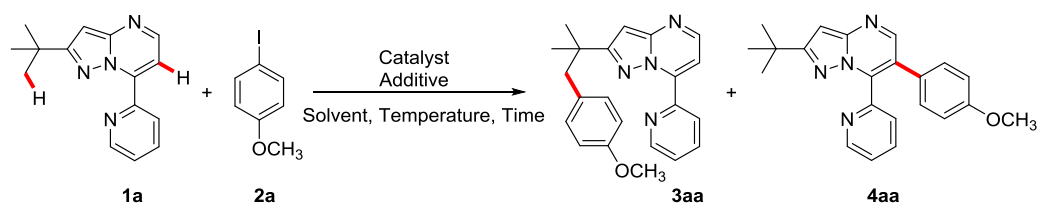

| entry | catalyst             | solvent | additive | T ( °C) | time (h) | yield (%)  |            |
|-------|----------------------|---------|----------|---------|----------|------------|------------|
|       |                      |         |          |         |          | <b>3aa</b> | <b>4aa</b> |
| 1     | PdCl <sub>2</sub>    | HFIP    | AgTFA    | 120     | 36       | 15         | -          |
| 2     | PdCl <sub>2</sub>    | HFIP    | AgTFA    | 140     | 48       | <5         | <10        |
| 3     | Pd(TFA) <sub>2</sub> | HFIP    | AgTFA    | 120     | 36       | 19         | <5         |
| 4     | Pd(TFA) <sub>2</sub> | HFIP    | AgTFA    | 140     | 48       | <5         | 16         |

<sup>a</sup>Reaction conditions: **1a** (1.0 mmol), **2a** (1.5 mmol), Catalyst (10 mol %), AgTFA (1.5 mmol), HFIP (3 mL). <sup>b</sup>Isolated Yield

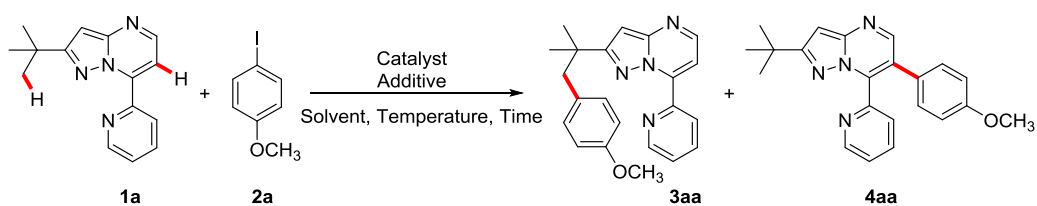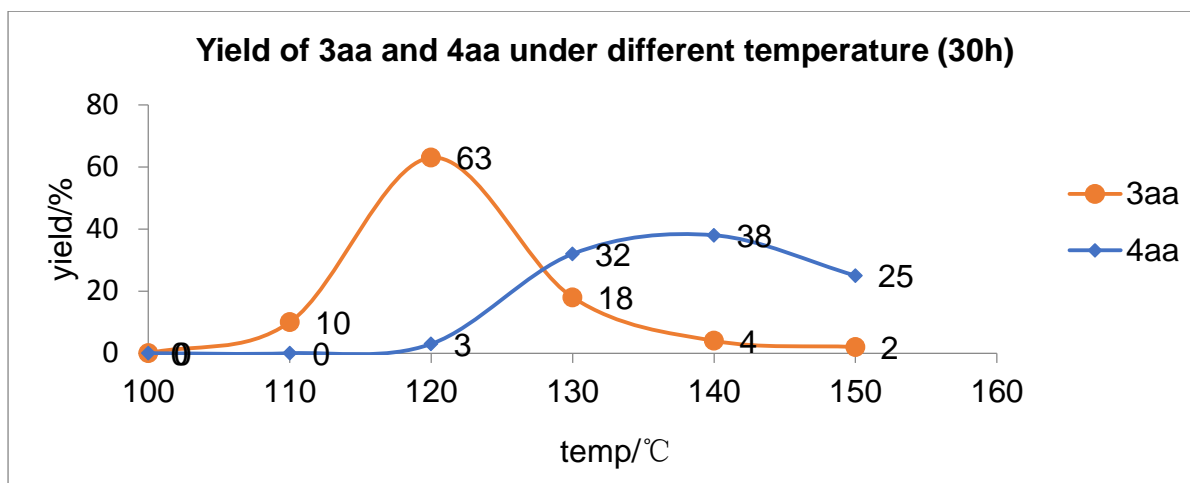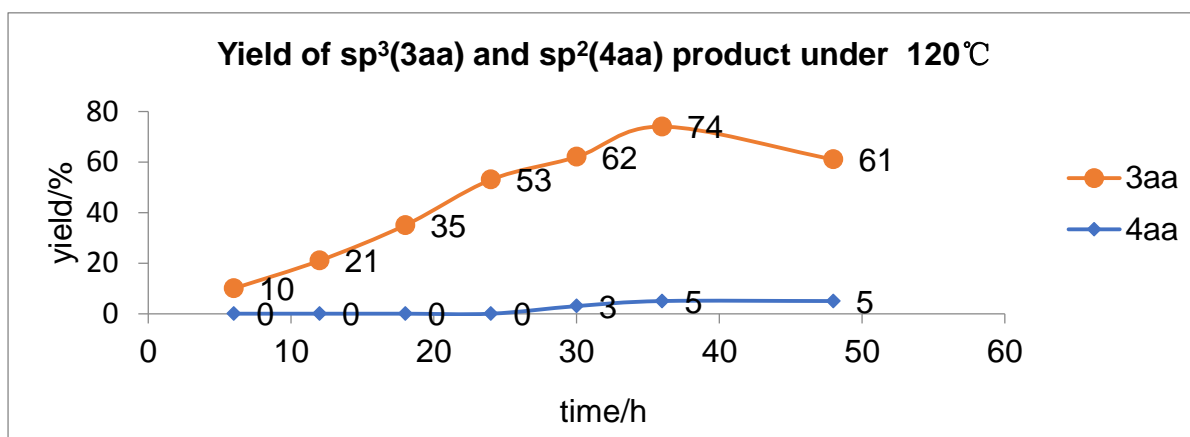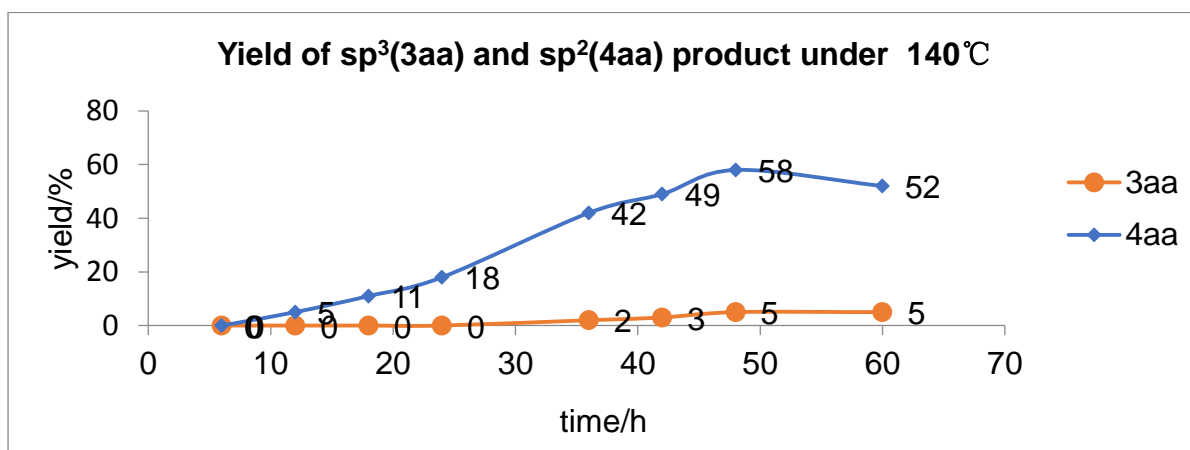

**Figure S1 | Effect of Temperature and Time on the C(sp<sup>3</sup>)-H and C(sp<sup>2</sup>)-H Arylation.** Reaction conditions: **1a** (1.0 mmol), **2a** (1.5 mmol), Catalyst (10 mol %), AgTFA (1.5 mmol), HFIP (3 mL).



## 4. General Procedure for C(sp<sup>3</sup>)-H and C(sp<sup>2</sup>)-H Arylation Reactions

### 4.1 C(sp<sup>3</sup>)-H Arylation Reaction (GP2)

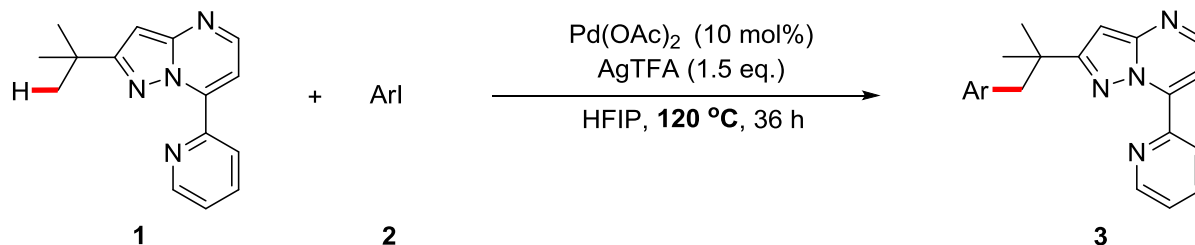

A 25 mL sealed tube was charged with 7-pyridyl-pyrazolo[1,5-a]pyrimidine derivative **1** (0.1 mmol), aryl iodide **2** (0.15 mmol, 1.5 equiv),  $\text{Pd}(\text{OAc})_2$  (10 mol%),  $\text{AgTFA}$  (1.5 equiv) and HFIP (2.0 mL). The mixture was then stirred at 120 °C for 36 hours. Upon completion, the reaction mixture was cooled to room temperature and diluted with DCM. Then the reaction mixture was filtered through a pad of celite and the celite was further washed with DCM. The solvent was removed under vacuum directly and the obtained crude product was purified by silica gel column chromatography to afford the desired product **3**.

### 4.2 C(sp<sup>2</sup>)-H Arylation Reaction (GP3)

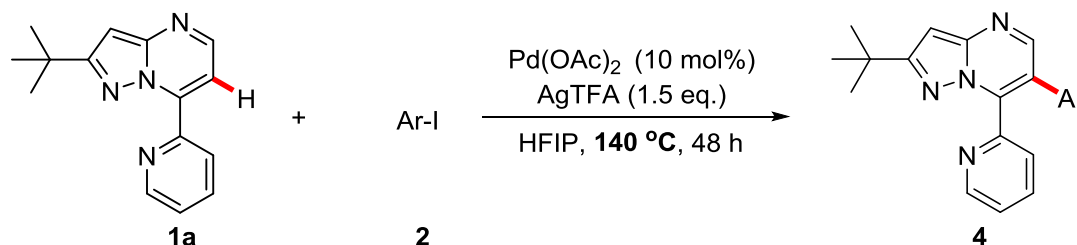

A 25 mL sealed tube was charged with 7-pyridyl-pyrazolo[1,5-a]pyrimidine derivative **1** (0.15 mmol), aryl iodide **2** (0.15 mmol, 1.5 equiv),  $\text{Pd}(\text{OAc})_2$  (10 mol%),  $\text{AgTFA}$  (1.5 equiv) and HFIP (2.0 mL). The mixture was then stirred at 140 °C for 48 hours. Upon completion, the reaction mixture was cooled to room temperature and diluted with DCM. Then the reaction mixture was filtered through a pad of celite, which was further washed with DCM. The solvent was removed under vacuum directly and the obtained crude product was purified by silica gel column chromatography to afford the desired product **4**.

## 5. Characterization Data for the Substrates and the Products

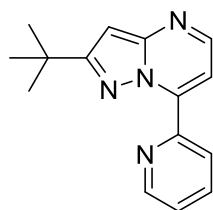

**2-(tert-Butyl)-7-(pyridine-2-yl)pyrazolo[1,5-a]pyrimidine (1a):** The title compound was obtained as a yellow solid in 86% yield according to the GP1.  $^1\text{H}$  NMR (500 MHz,  $\text{CDCl}_3$ ):  $\delta$  9.35 (d,  $J$  = 8.0 Hz, 1H), 8.80 (d,  $J$  = 4.0 Hz, 1H), 8.54 (d,  $J$  = 4.4 Hz, 1H), 7.94 (dd,  $J$  = 11.1, 4.4 Hz, 1H), 7.75 (d,  $J$  = 4.4 Hz, 1H), 7.45 (dd,  $J$  = 7.1, 4.9 Hz, 1H), 6.67 (s, 1H), 1.47 (s, 9H);  $^{13}\text{C}$  NMR (125 MHz,  $\text{CDCl}_3$ ):  $\delta$  167.5, 150.8, 149.7, 148.4, 148.3, 143.4, 136.6, 126.4, 125.3, 106.9, 93.0, 33.0, 30.5; HRMS (ESI)  $m/z$  calcd. For  $\text{C}_{15}\text{H}_{17}\text{N}_4$   $[\text{M}+\text{H}]^+$  253.1448, found 253.1451.

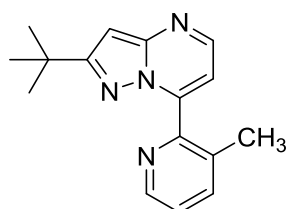

**2-(tert-Butyl)-7-(3-methylpyridin-2-yl)pyrazolo[1,5-a]pyrimidine (1b):** The title compound was obtained as a yellow solid in 86% yield according to the GP1.  $^1\text{H}$  NMR (500 MHz,  $\text{CDCl}_3$ ):  $\delta$  8.59 (dd,  $J$  = 4.7, 0.9 Hz, 1H), 8.50 (d,  $J$  = 4.2 Hz, 1H), 7.68 (dd,  $J$  = 7.8, 0.7 Hz, 1H), 7.39 (dd,  $J$  = 7.8, 4.8 Hz, 1H), 6.85 (d,  $J$  = 4.2 Hz, 1H), 6.62 (s, 1H), 2.16 (s, 3H), 1.35 (s, 9H);  $^{13}\text{C}$  NMR (125 MHz,  $\text{CDCl}_3$ ):  $\delta$  168.0, 149.9, 149.5, 148.1, 147.0, 145.8, 138.2, 134.3, 124.6, 107.7, 92.9, 32.9, 30.4, 18.5; HRMS (ESI)  $m/z$  calcd. For  $\text{C}_{16}\text{H}_{19}\text{N}_4$   $[\text{M}+\text{H}]^+$  267.1604, found 267.1614.

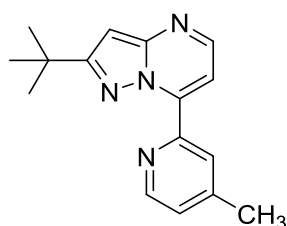

**2-(tert-Butyl)-7-(4-methylpyridin-2-yl)pyrazolo[1,5-a]pyrimidine (1c):** The title compound was obtained as a yellow solid in 84% yield according to the GP1.  $^1\text{H}$  NMR (500 MHz,  $\text{CDCl}_3$ )  $\delta$  9.19 (s, 1H), 8.64 (d,  $J$  = 4.9 Hz, 1H), 8.53 (d,  $J$  = 4.4 Hz, 1H), 7.71 (d,  $J$  = 4.4 Hz, 1H), 7.25 (d,  $J$  = 4.9 Hz, 1H), 6.66 (s, 1H), 2.50 (s, 3H), 1.47 (s, 9H);  $^{13}\text{C}$  NMR (125 MHz,  $\text{CDCl}_3$ )  $\delta$  167.3, 150.9, 149.4, 148.4, 148.3, 147.7, 143.5, 127.4, 126.0, 106.9, 92.9, 33.0, 30.5, 21.5; HRMS (ESI)  $m/z$  calcd. For  $\text{C}_{16}\text{H}_{19}\text{N}_4$   $[\text{M}+\text{H}]^+$  267.1604, found 267.1611.

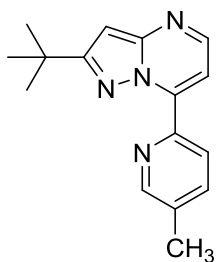

**2-(*tert*-Butyl)-7-(5-methylpyridin-2-yl)pyrazolo[1,5-a]pyrimidine (1d):** The title compound was obtained as a yellow solid in 63% yield according to the GP1.  $^1\text{H}$  NMR (500 MHz,  $\text{CDCl}_3$ ):  $\delta$  9.24 (d,  $J$  = 8.2 Hz, 1H), 8.62 (d,  $J$  = 1.7 Hz, 1H), 8.52 (d,  $J$  = 4.4 Hz, 1H), 7.73 (dd,  $J$  = 10.9, 3.0 Hz, 2H), 6.65 (s, 1H), 2.45 (s, 3H), 1.46 (s, 9H);  $^{13}\text{C}$  NMR (125 MHz,  $\text{CDCl}_3$ ):  $\delta$  167.4, 150.9, 150.3, 148.3, 145.8, 143.6, 136.9, 135.4, 125.9, 106.5, 92.9, 33.0, 30.5, 18.6; HRMS (ESI)  $m/z$  calcd. For  $\text{C}_{16}\text{H}_{19}\text{N}_4$   $[\text{M}+\text{H}]^+$  267.1604, found 267.1612.

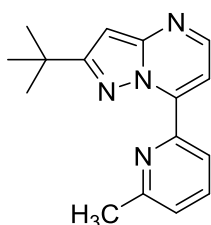

**2-(*tert*-Butyl)-7-(6-methylpyridin-2-yl)pyrazolo[1,5-a]pyrimidine (1e):** The title compound was obtained as a yellow solid in 68% yield according to the GP1.  $^1\text{H}$  NMR (500 MHz,  $\text{CDCl}_3$ ):  $\delta$  9.13 (d,  $J$  = 7.9 Hz, 1H), 8.53 (d,  $J$  = 4.4 Hz, 1H), 7.81 (t,  $J$  = 7.8 Hz, 1H), 7.76 (d,  $J$  = 4.4 Hz, 1H), 7.30 (d,  $J$  = 7.6 Hz, 1H), 6.65 (s, 1H), 2.67 (s, 3H), 1.46 (s, 9H);  $^{13}\text{C}$  NMR (125 MHz,  $\text{CDCl}_3$ ):  $\delta$  167.4, 158.6, 150.8, 148.3, 147.7, 143.7, 136.7, 125.0, 123.4, 106.9, 92.9, 33.0, 30.5, 24.7; HRMS (ESI)  $m/z$  calcd. For  $\text{C}_{16}\text{H}_{19}\text{N}_4$   $[\text{M}+\text{H}]^+$  267.1604, found 267.1612.

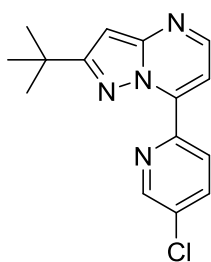

**2-(*tert*-Butyl)-7-(5-chloropyridin-2-yl)pyrazolo[1,5-a]pyrimidine (1f):** The title compound was obtained as a yellow solid in 59% yield according to the GP1.  $^1\text{H}$  NMR (500 MHz,  $\text{CDCl}_3$ )  $\delta$  9.40 (d,  $J$  = 8.6 Hz, 1H), 8.74 (d,  $J$  = 2.3 Hz, 1H), 8.55 (d,  $J$  = 4.4 Hz, 1H), 7.93 (dd,  $J$  = 8.6, 2.5 Hz, 1H), 7.76 (d,  $J$  = 4.4 Hz, 1H), 6.69 (s, 1H), 1.46 (s, 9H);  $^{13}\text{C}$  NMR (125 MHz,  $\text{CDCl}_3$ ):  $\delta$  167.7, 150.6, 148.8, 148.1, 146.4, 142.5, 136.3, 133.7, 127.0, 106.8, 93.2, 33.0, 30.5; HRMS (ESI)  $m/z$  calcd. For  $\text{C}_{15}\text{H}_{16}\text{ClN}_4$   $[\text{M}+\text{H}]^+$  287.1058, found 287.1048.

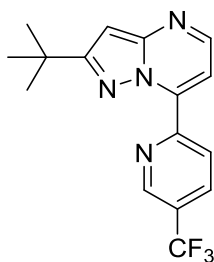

**2-(tert-Butyl)-7-(5-(trifluoromethyl)pyridin-2-yl)pyrazolo[1,5-a]pyrimidine (1g):** The title compound was obtained as a yellow solid in 46% yield according to the GP1.  $^1\text{H}$  NMR (500 MHz,  $\text{CDCl}_3$ ):  $\delta$  9.56 (d,  $J = 8.4$  Hz, 1H), 9.05 (dd,  $J = 1.5, 0.7$  Hz, 1H), 8.58 (d,  $J = 4.4$  Hz, 1H), 8.26 – 8.17 (m, 1H), 7.81 (d,  $J = 4.4$  Hz, 1H), 6.71 (s, 1H), 1.47 (s, 9H);  $^{13}\text{C}$  NMR (125 MHz,  $\text{CDCl}_3$ ):  $\delta$  167.8, 151.7, 150.9, 148.3, 146.4 (q,  $J = 3.9$  Hz), 141.8, 134.0, 127.4 (q,  $J = 33.3$  Hz), 125.8, 123.3 (q,  $J = 272.2$  Hz,  $\text{CF}_3$ ), 107.6, 93.5, 33.0, 30.5; HRMS (ESI)  $m/z$  calcd. For  $\text{C}_{16}\text{H}_{16}\text{F}_3\text{N}_4$   $[\text{M}+\text{H}]^+$  321.1322, found 321.1329.

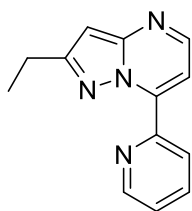

**2-Ethyl-7-(pyridin-2-yl)pyrazolo[1,5-a]pyrimidine (1h):** The title compound was obtained as a yellow solid in 42% yield according to the GP1.  $^1\text{H}$  NMR (500 MHz,  $\text{CDCl}_3$ ):  $\delta$  9.16 (d,  $J = 8.0$  Hz, 1H), 8.82 (d,  $J = 4.1$  Hz, 1H), 8.55 (d,  $J = 4.4$  Hz, 1H), 7.95 (td,  $J = 7.9, 1.6$  Hz, 1H), 7.64 (d,  $J = 4.4$  Hz, 1H), 7.46 (dd,  $J = 6.9, 4.8$  Hz, 1H), 6.64 (s, 1H), 2.95 (q,  $J = 7.6$  Hz, 2H), 1.41 (t,  $J = 7.6$  Hz, 3H);  $^{13}\text{C}$  NMR (125 MHz,  $\text{CDCl}_3$ ):  $\delta$  160.7, 151.0, 149.9, 148.6, 143.6, 136.7, 126.1, 125.3, 107.1, 94.9, 22.5, 13.7; HRMS (ESI)  $m/z$  calcd. For  $\text{C}_{13}\text{H}_{13}\text{N}_4$   $[\text{M}+\text{H}]^+$  225.1135, found 225.1148.

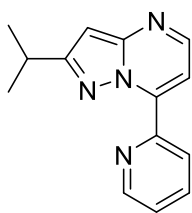

**2-Isopropyl-7-(pyridin-2-yl)pyrazolo[1,5-a]pyrimidine (1i):** The title compound was obtained as a yellow solid in 49% yield according to the GP1.  $^1\text{H}$  NMR (500 MHz,  $\text{CDCl}_3$ ):  $\delta$  9.24 (d,  $J = 8.0$  Hz, 1H), 8.81 (d,  $J = 3.7$  Hz, 1H), 8.55 (d,  $J = 4.2$  Hz, 1H), 7.95 (t,  $J = 7.2$  Hz, 1H), 7.68 (d,  $J = 4.3$  Hz, 1H), 7.46 (dd,  $J = 7.0, 4.7$  Hz, 1H), 6.64 (s, 1H), 3.25 (dt,  $J = 13.8, 6.9$  Hz, 1H), 1.43 (d,  $J = 6.9$  Hz, 6H);  $^{13}\text{C}$  NMR (125 MHz,  $\text{CDCl}_3$ ):  $\delta$  164.9, 150.9, 149.9, 148.6, 148.5, 143.5, 136.7, 126.3, 125.3, 107.1, 93.5, 28.8, 22.8; HRMS (ESI)  $m/z$  calcd. For  $\text{C}_{14}\text{H}_{15}\text{N}_4$   $[\text{M}+\text{H}]^+$  239.1291, found 239.1282.

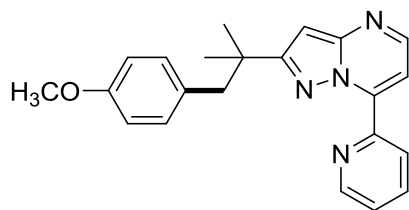

**2-(1-(4-Methoxyphenyl)-2-methylpropan-2-yl)-7-(pyridin-2-yl)pyrazolo[1,5-a]pyrimidine (3aa):** The title compound was obtained as a pale yellow semi solid in 74% yield according to the GP2.  $^1\text{H}$  NMR (500 MHz,  $\text{CDCl}_3$ ):  $\delta$  9.19 (d,  $J = 8.1$  Hz, 1H), 8.81 (d,  $J = 4.5$  Hz, 1H), 8.56 (d,  $J = 4.4$  Hz, 1H), 7.90 (td,  $J = 7.8, 1.7$  Hz, 1H), 7.76 (d,  $J = 4.4$  Hz, 1H), 7.45 (dd,  $J = 7.5, 4.8$  Hz, 1H), 6.90 – 6.84 (m, 2H), 6.74 – 6.67 (m, 2H), 6.60 (s, 1H), 3.73 (s, 3H), 3.01 (s, 2H), 1.43 (s, 6H);  $^{13}\text{C}$  NMR (125 MHz,  $\text{CDCl}_3$ ):  $\delta$  166.0, 158.0, 150.6, 149.6, 148.3, 148.2, 143.3, 136.7, 131.4, 130.8, 126.4, 125.3, 113.0, 107.0, 94.2, 55.1, 48.8, 37.3, 27.7; HRMS (ESI)  $m/z$  calcd. For  $\text{C}_{22}\text{H}_{23}\text{N}_4\text{O}$   $[\text{M}+\text{H}]^+$  359.1866, found 359.1874.

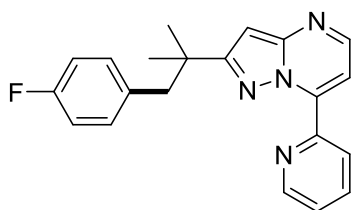

**2-(1-(4-Fluorophenyl)-2-methylpropan-2-yl)-7-(pyridin-2-yl)pyrazolo[1,5-a]pyrimidine (3ab):** The title compound was obtained as a pale yellow semi solid in 68% yield according to the GP2.  $^1\text{H}$  NMR (500 MHz,  $\text{CDCl}_3$ ):  $\delta$  9.15 (d,  $J = 8.1$  Hz, 1H), 8.85 – 8.78 (m, 1H), 8.57 (d,  $J = 4.4$  Hz, 1H), 7.90 (td,  $J = 7.8, 1.8$  Hz, 1H), 7.77 (d,  $J = 4.4$  Hz, 1H), 7.46 (ddd,  $J = 7.6, 4.7, 0.9$  Hz, 1H), 6.91 – 6.86 (m, 2H), 6.86 – 6.81 (m, 2H), 6.59 (s, 1H), 3.04 (s, 2H), 1.44 (s, 6H);  $^{13}\text{C}$  NMR (125 MHz,  $\text{CDCl}_3$ ):  $\delta$  165.5, 161.5 (d,  $J = 243.2$  Hz), 150.7, 149.7, 148.4, 148.3, 143.3, 136.7, 134.4 (d,  $J = 2.5$  Hz), 131.7 (d,  $J = 7.7$  Hz), 126.3, 125.3, 114.4 (d,  $J = 21.0$  Hz), 107.1, 94.2, 48.8, 37.2, 27.7; HRMS (ESI)  $m/z$  calcd. For  $\text{C}_{21}\text{H}_{20}\text{FN}_4$   $[\text{M}+\text{H}]^+$  347.1667, found 347.1681.

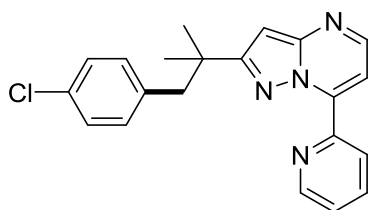

**2-(1-(4-Chlorophenyl)-2-methylpropan-2-yl)-7-(pyridin-2-yl)pyrazolo[1,5-a]pyrimidine (3ac):** The title compound was obtained as a pale yellow solid in 65% yield according to the GP2.  $^1\text{H}$  NMR (500 MHz,  $\text{CDCl}_3$ ):  $\delta$  9.10 (d,  $J = 8.1$  Hz, 1H), 8.86 – 8.77 (m, 1H), 8.57 (d,  $J = 4.4$  Hz, 1H), 7.90 (dd,  $J = 11.6, 4.1$  Hz, 1H), 7.76 (d,  $J = 4.4$  Hz, 1H), 7.50 – 7.42 (m, 1H), 7.14 – 7.08 (m, 2H), 6.86 (t,  $J = 5.4$  Hz, 2H), 6.59 (s, 1H), 3.03 (s, 2H), 1.44 (s, 6H);  $^{13}\text{C}$  NMR (125 MHz,  $\text{CDCl}_3$ ):  $\delta$  165.3, 150.7, 149.7, 148.5, 148.3, 143.4, 137.2, 136.7, 131.9, 131.7, 127.7, 126.3, 125.3, 107.2, 94.2, 49.1, 37.2, 27.7; HRMS (ESI)  $m/z$  calcd. For  $\text{C}_{21}\text{H}_{20}\text{ClN}_4$   $[\text{M}+\text{H}]^+$  363.1371, found 363.1379.

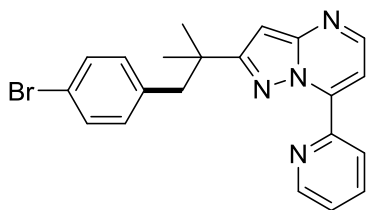

**2-(1-(4-Bromophenyl)-2-methylpropan-2-yl)-7-(pyridin-2-yl)pyrazolo[1,5-a]pyrimidine (3ad):** The title compound was obtained as a pale yellow solid in 59% yield according to the GP2.  $^1\text{H}$  NMR (500 MHz,  $\text{CDCl}_3$ ):  $\delta$  9.12 – 9.05 (m, 1H), 8.81 (dd,  $J$  = 4.7, 0.8 Hz, 1H), 8.56 (d,  $J$  = 4.4 Hz, 1H), 7.90 (td,  $J$  = 7.8, 1.8 Hz, 1H), 7.76 (d,  $J$  = 4.4 Hz, 1H), 7.49 – 7.42 (m, 1H), 7.28 – 7.25 (m, 2H), 6.84 – 6.77 (m, 2H), 6.60 (s, 1H), 3.01 (s, 2H), 1.44 (s, 6H);  $^{13}\text{C}$  NMR (125 MHz,  $\text{CDCl}_3$ ):  $\delta$  165.3, 150.7, 149.7, 148.4, 148.3, 143.4, 137.7, 136.7, 132.1, 130.7, 126.3, 125.3, 120.0, 107.2, 94.2, 49.1, 37.2, 27.7; HRMS (ESI)  $m/z$  calcd. For  $\text{C}_{21}\text{H}_{20}\text{BrN}_4$   $[\text{M}+\text{H}]^+$  407.0866, found 407.0876.

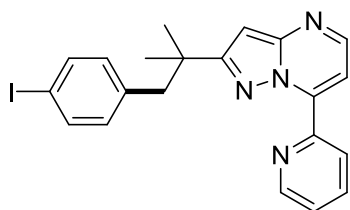

**2-(1-(4-Iodophenyl)-2-methylpropan-2-yl)-7-(pyridin-2-yl)pyrazolo[1,5-a]pyrimidine (3ae):** The title compound was obtained as a pale yellow semi solid in 53% yield according to the GP2.  $^1\text{H}$  NMR (500 MHz,  $\text{CDCl}_3$ ):  $\delta$  9.08 (d,  $J$  = 8.0 Hz, 1H), 8.82 (d,  $J$  = 3.7 Hz, 1H), 8.57 (d,  $J$  = 4.4 Hz, 1H), 7.92 (t,  $J$  = 7.2 Hz, 1H), 7.77 (d,  $J$  = 4.4 Hz, 1H), 7.47 (dd,  $J$  = 7.3, 4.8 Hz, 1H), 7.28 – 7.25 (m, 3H), 6.80 (d,  $J$  = 8.3 Hz, 2H), 6.60 (s, 1H), 3.01 (s, 2H), 1.44 (s, 6H);  $^{13}\text{C}$  NMR (125 MHz,  $\text{CDCl}_3$ ):  $\delta$  165.3, 150.6, 149.7, 148.4, 148.2, 143.3, 137.7, 136.8, 132.1, 130.7, 126.3, 125.4, 120.0, 107.2, 94.2, 49.1, 37.2, 27.8; HRMS (ESI)  $m/z$  calcd. For  $\text{C}_{21}\text{H}_{20}\text{IN}_4$   $[\text{M}+\text{H}]^+$  455.0727, found 455.0736.

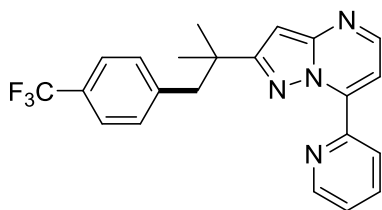

**2-(2-Methyl-1-(4-(trifluoromethyl)phenyl)propan-2-yl)-7-(pyridin-2-yl)pyrazolo[1,5-a]pyrimidine (3af):** The title compound was obtained as a pale yellow semi solid in 52% yield according to the GP2.  $^1\text{H}$  NMR (500 MHz,  $\text{CDCl}_3$ ):  $\delta$  9.05 (d,  $J$  = 8.1 Hz, 1H), 8.81 (dd,  $J$  = 4.7, 0.8 Hz, 1H), 8.58 (d,  $J$  = 4.4 Hz, 1H), 7.87 (td,  $J$  = 7.9, 1.8 Hz, 1H), 7.77 (d,  $J$  = 4.4 Hz, 1H), 7.45 (ddd,  $J$  = 7.6, 4.7, 0.8 Hz, 1H), 7.40 (d,  $J$  = 8.0 Hz, 2H), 7.04 (d,  $J$  = 8.0 Hz, 2H), 6.61 (s, 1H), 3.12 (s, 2H), 1.46 (s, 6H);  $^{13}\text{C}$  NMR (126 MHz,  $\text{CDCl}_3$ )  $\delta$  165.0, 150.8, 149.8, 148.6, 148.3, 143.4, 142.9, 136.6, 130.7, 128.3 (q,  $J$  = 32.7 Hz), 126.2, 125.3, 124.4 (q,  $J$  = 3.8 Hz), 124.3 (q,  $J$  = 272.3 Hz), 107.3, 94.1, 49.5, 37.3, 27.8; HRMS (ESI)  $m/z$  calcd. For  $\text{C}_{22}\text{H}_{20}\text{F}_3\text{N}_4$   $[\text{M}+\text{H}]^+$  397.1635, found 397.1644.

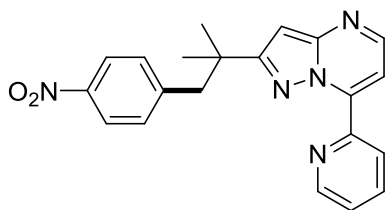

**2-(2-Methyl-1-(4-nitrophenyl)propan-2-yl)-7-(pyridin-2-yl)pyrazolo[1,5-a]pyrimidine (3ag):** The title compound was obtained as a pale yellow semi solid in 38% yield according to the GP2.  $^1\text{H}$  NMR (500 MHz,  $\text{CDCl}_3$ ):  $\delta$  9.08 (d,  $J$  = 8.1 Hz, 1H), 8.85 – 8.79 (m, 1H), 8.59 (d,  $J$  = 4.4 Hz, 1H), 7.99 (d,  $J$  = 8.8 Hz, 2H), 7.89 (td,  $J$  = 7.9, 1.8 Hz, 1H), 7.80 (d,  $J$  = 4.4 Hz, 1H), 7.47 (ddd,  $J$  = 7.6, 4.7, 1.0 Hz, 1H), 7.07 (d,  $J$  = 8.7 Hz, 2H), 6.59 (s, 1H), 3.18 (s, 2H), 1.48 (s, 6H);  $^{13}\text{C}$  NMR (125 MHz,  $\text{CDCl}_3$ ):  $\delta$  164.6, 150.7, 149.8, 148.7, 148.2, 146.8, 146.5, 143.4, 136.7, 131.1, 126.2, 125.5, 122.8, 107.4, 94.2, 49.5, 37.5, 27.9; HRMS (ESI)  $m/z$  calcd. For  $\text{C}_{21}\text{H}_{20}\text{N}_5\text{O}_2$   $[\text{M}+\text{H}]^+$  374.1612, found 374.1626.

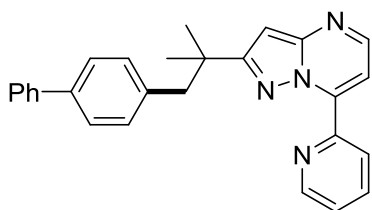

**2-(1-([1,1'-Biphenyl]-4-yl)-2-methylpropan-2-yl)-7-(pyridin-2-yl)pyrazolo[1,5-a]pyrimidine (3ah):** The title compound was obtained as a yellow solid in 66% yield according to the GP2.  $^1\text{H}$  NMR (500 MHz,  $\text{CDCl}_3$ ):  $\delta$  9.15 (d,  $J$  = 8.0 Hz, 1H), 8.80 (d,  $J$  = 3.9 Hz, 1H), 8.57 (d,  $J$  = 4.2 Hz, 1H), 7.85 (t,  $J$  = 7.4 Hz, 1H), 7.77 (d,  $J$  = 4.3 Hz, 1H), 7.52 (d,  $J$  = 7.4 Hz, 2H), 7.41 (dt,  $J$  = 16.7, 6.6 Hz, 5H), 7.29 (t,  $J$  = 7.3 Hz, 1H), 7.02 (d,  $J$  = 8.0 Hz, 2H), 6.66 (s, 1H), 3.11 (s, 2H), 1.48 (s, 6H);  $^{13}\text{C}$  NMR (125 MHz,  $\text{CDCl}_3$ ):  $\delta$  165.9, 150.6, 149.6, 148.3, 143.3, 141.0, 138.8, 137.9, 136.8, 130.9, 128.7, 127.0, 126.9, 126.4, 126.3, 125.4, 107.1, 94.2, 49.4, 37.4, 27.8; HRMS (ESI)  $m/z$  calcd. For  $\text{C}_{27}\text{H}_{25}\text{N}_4$   $[\text{M}+\text{H}]^+$  405.2074, found 405.2083.

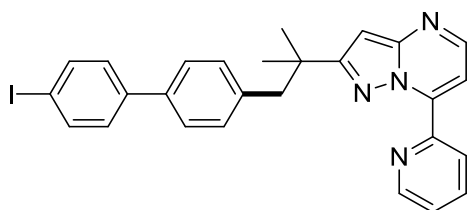

**2-(1-(4-Methoxyphenyl)-2-methylpropan-2-yl)-7-(pyridin-2-yl)pyrazolo[1,5-a]pyrimidine (3ai):** The title compound was obtained as a yellow solid in 41% yield according to the GP2.  $^1\text{H}$  NMR (500 MHz,  $\text{CDCl}_3$ ):  $\delta$  9.15 (d,  $J$  = 8.1 Hz, 1H), 8.81 (dd,  $J$  = 4.7, 0.9 Hz, 1H), 8.57 (d,  $J$  = 4.4 Hz, 1H), 7.85 (td,  $J$  = 7.9, 1.8 Hz, 1H), 7.77 (d,  $J$  = 4.4 Hz, 1H), 7.73 – 7.68 (m, 2H), 7.43 (ddd,  $J$  = 7.6, 4.8, 0.9 Hz, 1H), 7.34 (d,  $J$  = 8.2 Hz, 2H), 7.27 (s, 1H), 7.25 (d,  $J$  = 1.9 Hz, 1H), 7.01 (d,  $J$  = 8.2 Hz, 2H), 6.63 (s, 1H), 3.11 (s, 2H), 1.48 (s, 6H);  $^{13}\text{C}$  NMR (125 MHz,  $\text{CDCl}_3$ ):  $\delta$  165.7, 150.7, 149.7, 148.4, 143.4, 140.5, 138.5, 137.8, 137.6,

136.7, 131.0, 128.8, 126.3, 126.0, 125.3, 107.1, 94.2, 92.7, 49.4, 37.4, 27.8; HRMS (ESI)  $m/z$  calcd. For  $C_{27}H_{24}N_4$   $[M+H]^+$  531.1040, found 531.1049.

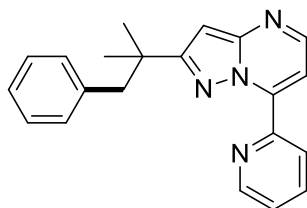

**2-(2-Methyl-1-phenylpropan-2-yl)-7-(pyridin-2-yl)pyrazolo[1,5-a]pyrimidine (3aj):** The title compound was obtained as a pale yellow semi solid in 58% yield according to the GP2.  $^1H$  NMR (500 MHz,  $CDCl_3$ ):  $\delta$  9.17 (d,  $J$  = 8.1 Hz, 1H), 8.81 (ddd,  $J$  = 4.7, 1.7, 0.8 Hz, 1H), 8.56 (d,  $J$  = 4.4 Hz, 1H), 7.90 (td,  $J$  = 7.9, 1.8 Hz, 1H), 7.76 (d,  $J$  = 4.4 Hz, 1H), 7.45 (ddd,  $J$  = 7.6, 4.7, 1.0 Hz, 1H), 7.19 – 7.13 (m, 3H), 6.99 – 6.93 (m, 2H), 6.61 (s, 1H), 3.08 (s, 2H), 1.45 (s, 6H);  $^{13}C$  NMR (125 MHz,  $CDCl_3$ ):  $\delta$  165.9, 150.7, 149.7, 148.3, 143.3, 138.7, 136.7, 130.5, 127.6, 126.4, 125.9, 125.3, 107.0, 94.1, 49.7, 37.2, 27.7; HRMS (ESI)  $m/z$  calcd. For  $C_{23}H_{23}N_4O_2$   $[M+H]^+$  387.1816, found 387.1832.

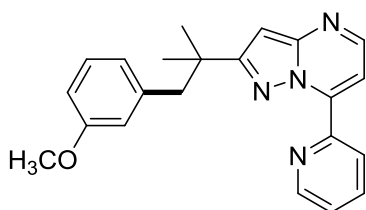

**2-(1-(3-Methoxyphenyl)-2-methylpropan-2-yl)-7-(pyridin-2-yl)pyrazolo[1,5-a]pyrimidine (3ak):** The title compound was obtained as a pale yellow semi solid in 65% yield according to the GP2.  $^1H$  NMR (500 MHz,  $CDCl_3$ ):  $\delta$  9.18 (d,  $J$  = 8.1 Hz, 1H), 8.81 (ddd,  $J$  = 4.7, 1.7, 0.8 Hz, 1H), 8.56 (d,  $J$  = 4.4 Hz, 1H), 7.90 (td,  $J$  = 7.9, 1.8 Hz, 1H), 7.75 (d,  $J$  = 4.4 Hz, 1H), 7.45 (ddd,  $J$  = 7.6, 4.7, 1.1 Hz, 1H), 7.12 – 7.04 (m, 1H), 6.70 (ddd,  $J$  = 8.2, 2.6, 0.7 Hz, 1H), 6.62 (s, 1H), 6.58 (d,  $J$  = 7.6 Hz, 1H), 6.52 – 6.47 (m, 1H), 3.61 (s, 3H), 3.06 (s, 2H), 1.45 (s, 6H);  $^{13}C$  NMR (125 MHz,  $CDCl_3$ ):  $\delta$  165.9, 158.9, 150.7, 149.7, 148.4, 148.4, 143.4, 140.3, 136.6, 128.5, 126.4, 125.3, 123.0, 116.1, 111.5, 107.0, 94.23, 54.9, 49.7, 37.3, 27.8; HRMS (ESI)  $m/z$  calcd. For  $C_{22}H_{23}N_4O$   $[M+H]^+$  359.1866, found 359.1876.

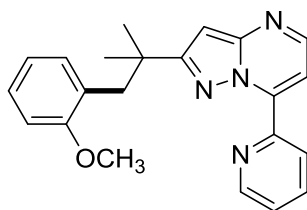

**2-(1-(2-Methoxyphenyl)-2-methylpropan-2-yl)-7-(pyridin-2-yl)pyrazolo[1,5-a]pyrimidine (3al):** The title compound was obtained as a pale yellow semi solid in 58% yield according to the GP2.  $^1H$  NMR (500 MHz,  $CDCl_3$ ):  $\delta$  9.22 – 9.17 (m, 1H), 8.81 (ddd,  $J$  = 4.7, 1.7, 0.9 Hz, 1H), 8.56 (d,  $J$  = 4.5 Hz, 1H), 7.90 (td,  $J$  = 7.9, 1.8 Hz, 1H), 7.76 (d,  $J$  = 4.5 Hz, 1H), 7.46 (ddd,  $J$  = 7.6, 4.7, 1.1 Hz, 1H), 7.14 (ddd,  $J$  = 8.2, 7.5,



1.8 Hz, 1H), 6.87 (dd,  $J = 7.4, 1.7$  Hz, 1H), 6.76 (ddd,  $J = 11.0, 5.9, 2.3$  Hz, 2H), 6.62 (s, 1H), 3.60 (s, 3H), 3.12 (s, 2H), 1.45 (s, 6H);  $^{13}\text{C}$  NMR (125 MHz,  $\text{CDCl}_3$ )  $\delta$  166.6, 158.1, 150.3, 149.5, 148.2, 147.9, 143.3, 136.9, 132.2, 127.3, 126.6, 125.4, 119.7, 110.1, 106.8, 94.1, 54.8, 42.3, 37.7, 27.5; HRMS (ESI)  $m/z$  calcd. For  $\text{C}_{22}\text{H}_{23}\text{N}_4\text{O}$   $[\text{M}+\text{H}]^+$  359.1866, found 359.1871.

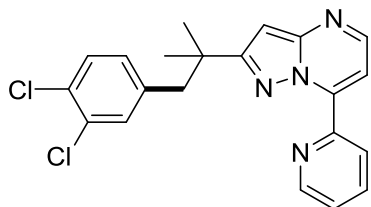

**2-(1-(3,4-Dichlorophenyl)-2-methylpropan-2-yl)-7-(pyridin-2-yl)pyrazolo[1,5-a]pyrimidine (3am):**

The title compound was obtained as a yellow solid in 46% yield according to the GP2.  $^1\text{H}$  NMR (500 MHz,  $\text{CDCl}_3$ ):  $\delta$  9.06 (d,  $J = 8.1$  Hz, 1H), 8.85 – 8.78 (m, 1H), 8.58 (d,  $J = 4.4$  Hz, 1H), 7.91 (td,  $J = 7.8, 1.8$  Hz, 1H), 7.77 (d,  $J = 4.4$  Hz, 1H), 7.47 (ddd,  $J = 7.5, 4.7, 0.8$  Hz, 1H), 7.18 (d,  $J = 8.2$  Hz, 1H), 7.07 (d,  $J = 2.0$  Hz, 1H), 6.71 (dd,  $J = 8.2, 2.0$  Hz, 1H), 6.61 (s, 1H), 3.01 (s, 2H), 1.45 (s, 6H);  $^{13}\text{C}$  NMR (125 MHz,  $\text{CDCl}_3$ ):  $\delta$  164.9, 150.7, 149.7, 148.6, 148.2, 143.4, 139.1, 136.7, 132.2, 131.4, 130.05, 129.8, 129.5, 126.2, 125.4, 107.3, 94.1, 48.8, 37.2, 27.8; HRMS (ESI)  $m/z$  calcd. For  $\text{C}_{21}\text{H}_{19}\text{Cl}_2\text{N}_4$   $[\text{M}+\text{H}]^+$  397.0981, found 397.0996.

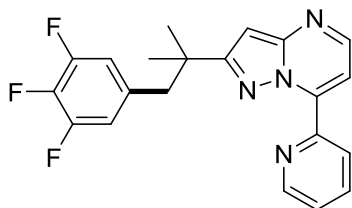

**2-(2-Methyl-1-(3,4,5-trifluorophenyl)propan-2-yl)-7-(pyridin-2-yl)pyrazolo[1,5-a]pyrimidine (3an):**

The title compound was obtained as a yellow semi solid in 40% yield according to the GP2.  $^1\text{H}$  NMR (500 MHz,  $\text{CDCl}_3$ ):  $\delta$  9.15 (d,  $J = 8.1$  Hz, 1H), 8.84 (dd,  $J = 4.6, 0.9$  Hz, 1H), 8.59 (d,  $J = 4.4$  Hz, 1H), 7.94 (td,  $J = 7.9, 1.7$  Hz, 1H), 7.80 (d,  $J = 4.4$  Hz, 1H), 7.49 (ddt,  $J = 7.8, 4.0, 2.0$  Hz, 1H), 6.61 (s, 1H), 6.56 (dd,  $J = 8.7, 6.6$  Hz, 2H), 3.02 (s, 2H), 1.45 (s, 6H);  $^{13}\text{C}$  NMR (125 MHz,  $\text{CDCl}_3$ ):  $\delta$  164.8, 151.4 (dd,  $J = 9.8, 4.1$  Hz), 150.7, 149.8, 149.4 (dd,  $J = 9.8, 4.1$  Hz), 148.6, 148.2, 143.4, 136.8, 135.0, 126.2, 125.5, 114.2 (dd,  $J = 15.8, 4.5$  Hz), 107.5, 94.1, 48.8, 37.2, 27.9; HRMS (ESI)  $m/z$  calcd. For  $\text{C}_{21}\text{H}_{18}\text{F}_3\text{N}_4$   $[\text{M}+\text{H}]^+$  383.1478, found 383.1486.

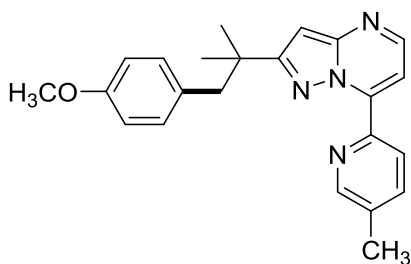

**2-(1-(4-Methoxyphenyl)-2-methylpropan-2-yl)-7-(5-methylpyridin-2-yl)pyrazolo[1,5-a]pyrimidine**

**(3ba):** The title compound was obtained as a pale yellow solid in 46% yield according to the GP2. <sup>1</sup>H NMR (500 MHz, CDCl<sub>3</sub>): δ 9.10 (d, *J* = 8.1 Hz, 1H), 8.63 (s, 1H), 8.53 (d, *J* = 4.3 Hz, 1H), 7.71 (dd, *J* = 11.0, 6.3 Hz, 2H), 6.88 (d, *J* = 8.5 Hz, 2H), 6.70 (d, *J* = 8.5 Hz, 2H), 6.57 (s, 1H), 3.73 (s, 3H), 3.01 (s, 2H), 2.46 (s, 3H), 1.42 (s, 6H); <sup>13</sup>C NMR (125 MHz, CDCl<sub>3</sub>): δ 165.8, 157.9, 150.8, 150.4, 148.4, 145.8, 143.5, 136.9, 135.5, 131.4, 130.9, 125.9, 113.0, 106.6, 94.0, 55.2, 48.8, 37.3, 27.7, 18.6; HRMS (ESI) *m/z* calcd. For C<sub>23</sub>H<sub>25</sub>N<sub>4</sub>O [M+H]<sup>+</sup> 373.2023, found 373.2029.

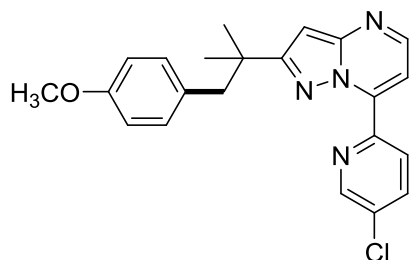**7-(5-Chloropyridin-2-yl)-2-(1-(4-methoxyphenyl)-2-methylpropan-2-yl)pyrazolo[1,5-a]pyrimidine**

**(3ca):** The title compound was obtained as a pale yellow solid in 38 % yield according to the GP2. <sup>1</sup>H NMR (500 MHz, CDCl<sub>3</sub>): δ 9.21 (d, *J* = 8.6 Hz, 1H), 8.74 (d, *J* = 2.5 Hz, 1H), 8.56 (d, *J* = 4.5 Hz, 1H), 7.87 (dd, *J* = 8.6, 2.5 Hz, 1H), 7.75 (d, *J* = 4.4 Hz, 1H), 6.90 – 6.83 (m, 2H), 6.74 – 6.66 (m, 2H), 6.61 (s, 1H), 3.73 (s, 3H), 3.00 (s, 2H), 1.43 (s, 6H); <sup>13</sup>C NMR (125 MHz, CDCl<sub>3</sub>): δ 166.1, 158.0, 150.6, 148.8, 148.2, 146.4, 142.4, 136.2, 133.7, 131.4, 130.8, 127.0, 113.0, 106.9, 94.3, 55.1, 48.9, 37.3, 27.7; HRMS (ESI) *m/z* calcd. For C<sub>22</sub>H<sub>22</sub>ClN<sub>4</sub>O [M+H]<sup>+</sup> 393.1477, found 393.1479.

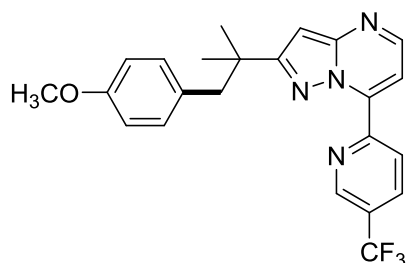**2-(1-(4-Methoxyphenyl)-2-methylpropan-2-yl)-7-(5-(trifluoromethyl)pyridin-2-yl)pyrazolo[1,5-a]pyrimidine (3da):**

The title compound was obtained as a pale yellow solid in 32% yield according to the GP2. <sup>1</sup>H NMR (500 MHz, CDCl<sub>3</sub>): δ 9.35 (d, *J* = 8.4 Hz, 1H), 9.05 (d, *J* = 0.7 Hz, 1H), 8.60 (d, *J* = 4.4 Hz, 1H), 8.15 (dd, *J* = 8.4, 1.8 Hz, 1H), 7.83 (d, *J* = 4.4 Hz, 1H), 6.86 (d, *J* = 8.6 Hz, 2H), 6.71 (d, *J* = 8.7 Hz, 2H), 6.66 (s, 1H), 3.73 (s, 3H), 3.00 (s, 2H), 1.44 (s, 6H); <sup>13</sup>C NMR (125 MHz, CDCl<sub>3</sub>): δ 166.2, 158.0, 151.6, 150.7, 148.3, 146.4 (q, *J* = 3.8 Hz), 141.8, 134.0 (q, *J* = 3.8 Hz), 131.4, 130.7, 127.5 (q, *J* = 32.8 Hz), 125.8, 123.3 (q, *J* = 272.2 Hz), 113.0, 107.7, 94.6, 55.1, 48.9, 37.4, 27.7; HRMS (ESI) *m/z* calcd. For C<sub>23</sub>H<sub>22</sub>F<sub>3</sub>N<sub>4</sub>O [M+H]<sup>+</sup> 427.1740, found 427.1746.

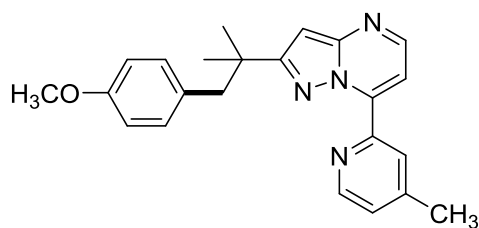

**2-(1-(4-Methoxyphenyl)-2-methylpropan-2-yl)-7-(4-methylpyridin-2-yl)pyrazolo[1,5-a]pyrimidine**

**(3ea):** The title compound was obtained as a pale yellow solid in 36% yield according to the GP2.  $^1\text{H}$  NMR (500 MHz,  $\text{CDCl}_3$ ):  $\delta$  8.97 (s, 1H), 8.65 (d,  $J = 4.9$  Hz, 1H), 8.54 (d,  $J = 4.4$  Hz, 1H), 7.71 (d,  $J = 4.4$  Hz, 1H), 7.27 (d,  $J = 3.3$  Hz, 1H), 6.88 – 6.83 (m, 2H), 6.74 – 6.67 (m, 2H), 6.60 (s, 1H), 3.72 (s, 3H), 3.00 (s, 2H), 2.46 (s, 3H), 1.43 (s, 6H);  $^{13}\text{C}$  NMR (125 MHz,  $\text{CDCl}_3$ ):  $\delta$  165.7, 157.9, 150.8, 149.3, 148.4, 148.1, 131.3, 130.8, 127.4, 126.1, 123.0, 107.1, 94.1, 55.1, 49.0, 37.3, 27.6, 21.5; HRMS (ESI)  $m/z$  calcd. For  $\text{C}_{23}\text{H}_{25}\text{N}_4\text{O}$   $[\text{M}+\text{H}]^+$  373.2023, found 373.2039.

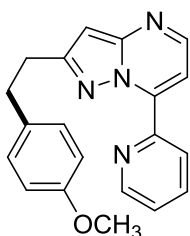

**2-(4-Methoxyphenethyl)-7-(pyridin-2-yl)pyrazolo[1,5-a]pyrimidine (3fa):** The title compound was obtained as a pale yellow solid in 33% yield according to the GP2.  $^1\text{H}$  NMR (500 MHz,  $\text{CDCl}_3$ ):  $\delta$  9.12 – 9.04 (m, 1H), 8.83 (ddd,  $J = 4.8, 1.8, 0.9$  Hz, 1H), 8.56 (d,  $J = 4.4$  Hz, 1H), 7.95 (td,  $J = 7.8, 1.8$  Hz, 1H), 7.67 (d,  $J = 4.4$  Hz, 1H), 7.49 (ddt,  $J = 7.1, 3.4, 1.7$  Hz, 1H), 7.22 – 7.16 (m, 2H), 6.89 – 6.82 (m, 2H), 6.62 (s, 1H), 3.79 (s, 3H), 3.21 (dd,  $J = 9.1, 6.6$  Hz, 2H), 3.08 (dd,  $J = 9.1, 6.7$  Hz, 2H);  $^{13}\text{C}$  NMR (125 MHz,  $\text{CDCl}_3$ ):  $\delta$  158.5, 157.9, 150.6, 149.7, 148.4, 148.2, 143.4, 137.0, 133.5, 129.4, 126.3, 125.5, 113.8, 107.3, 95.7, 55.3, 34.6, 31.2; HRMS (ESI)  $m/z$  calcd. For  $\text{C}_{20}\text{H}_{19}\text{N}_4\text{O}$   $[\text{M}+\text{H}]^+$  331.1553, found 331.1562.

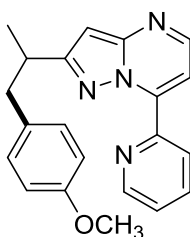

**2-(1-(4-Methoxyphenyl)propan-2-yl)-7-(pyridin-2-yl)pyrazolo[1,5-a]pyrimidine (3ga):** The title compound was obtained as a pale yellow solid in 38% yield according to the GP2.  $^1\text{H}$  NMR (500 MHz,  $\text{CDCl}_3$ ):  $\delta$  9.04 (dt,  $J = 8.1, 1.0$  Hz, 1H), 8.80 (ddd,  $J = 4.7, 1.8, 0.9$  Hz, 1H), 8.55 (d,  $J = 4.4$  Hz, 1H), 7.94 – 7.87 (m, 1H), 7.66 (d,  $J = 4.4$  Hz, 1H), 7.44 (ddd,  $J = 7.6, 4.7, 1.1$  Hz, 1H), 7.15 – 7.06 (m, 2H), 6.84 – 6.77 (m, 2H), 6.62 (s, 1H), 3.77 (s, 3H), 3.38 (dd,  $J = 14.9, 6.9$  Hz, 1H), 3.14 (dd,  $J = 13.7, 6.7$  Hz, 1H), 2.87 (dd,  $J = 13.7, 8.1$  Hz, 1H), 1.38 (d,  $J = 6.9$  Hz, 3H);  $^{13}\text{C}$  NMR (125 MHz,  $\text{CDCl}_3$ ):  $\delta$  163.2, 157.9,

150.8, 149.8, 148.5, 143.5, 136.7, 132.6, 130.1, 126.2, 125.3, 113.6, 107.1, 94.1, 55.2, 42.7, 36.1, 20.1; HRMS (ESI)  $m/z$  calcd. For  $C_{21}H_{21}N_4O$   $[M+H]^+$  345.1710, found 345.1719.

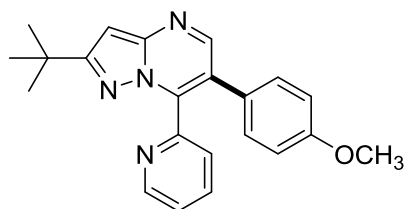

**2-(tert-Butyl)-6-(4-methoxyphenyl)-7-(pyridin-2-yl)pyrazolo[1,5-a]pyrimidine (4aa):** The title compound was obtained as a pale yellow solid in 58% yield according to the GP3.  $^1H$  NMR (500 MHz,  $CDCl_3$ ):  $\delta$  8.58 (s, 1H), 8.45 (s, 1H), 7.69 (t,  $J = 7.1$  Hz, 1H), 7.48 (d,  $J = 7.8$  Hz, 1H), 7.25 (d,  $J = 5.0$  Hz, 1H), 6.98 (d,  $J = 8.2$  Hz, 2H), 6.69 (d,  $J = 8.3$  Hz, 2H), 6.53 (s, 1H), 3.68 (s, 3H), 1.24 (s, 9H);  $^{13}C$  NMR (125 MHz,  $CDCl_3$ ):  $\delta$  168.0, 159.0, 150.8, 149.9, 148.8, 141.1, 136.5, 131.0, 127.1, 126.5, 124.2, 120.6, 114.0, 93.0, 55.4, 33.0, 30.4; HRMS (ESI)  $m/z$  calcd. For  $C_{22}H_{23}N_4O$   $[M+H]^+$  359.1866, found 359.1858.

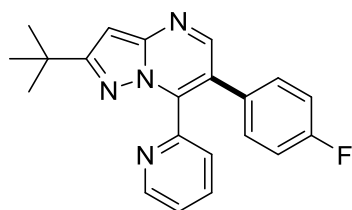

**2-(tert-Butyl)-6-(4-fluorophenyl)-7-(pyridin-2-yl)pyrazolo[1,5-a]pyrimidine (4ab):** The title compound was obtained as a pale yellow solid in 56% yield according to the GP3.  $^1H$  NMR (500 MHz,  $CDCl_3$ ):  $\delta$  8.63 (d,  $J = 4.5$  Hz, 1H), 8.52 (s, 1H), 7.85 – 7.74 (m, 1H), 7.63 (d,  $J = 7.8$  Hz, 1H), 7.34 (ddd,  $J = 7.6, 4.9, 0.9$  Hz, 1H), 7.16 – 7.08 (m, 2H), 6.95 (dd,  $J = 9.7, 7.7$  Hz, 2H), 6.64 (s, 1H), 1.34 (s, 9H);  $^{13}C$  NMR (125 MHz,  $CDCl_3$ ):  $\delta$  168.4, 162.2 (d,  $J = 246$  Hz), 161.2, 150.3, 149.1, 149.0, 148.9, 136.9, 131.6 (d,  $J = 8.2$  Hz), 130.8, 126.7, 124.4, 120.1, 115.6 (d,  $J = 21.6$  Hz), 93.3, 33.0, 30.3; HRMS (ESI)  $m/z$  calcd. For  $C_{21}H_{20}FN_4$   $[M+H]^+$  347.1667, found 347.1678.

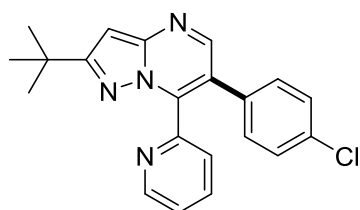

**2-(tert-Butyl)-6-(4-chlorophenyl)-7-(pyridin-2-yl)pyrazolo[1,5-a]pyrimidine (4ac):** The title compound was obtained as a pale yellow solid in 51% yield according to the GP3.  $^1H$  NMR (500 MHz,  $CDCl_3$ ):  $\delta$  8.64 (d,  $J = 4.3$  Hz, 1H), 8.52 (s, 1H), 7.82 (dd,  $J = 7.7, 6.6$  Hz, 1H), 7.67 (d,  $J = 7.8$  Hz, 1H), 7.37 (dd,  $J = 7.0, 4.8$  Hz, 1H), 7.23 (d,  $J = 8.5$  Hz, 2H), 7.09 (d,  $J = 8.5$  Hz, 2H), 6.65 (s, 1H), 1.34 (s, 9H);  $^{13}C$  NMR

(125 MHz, CDCl<sub>3</sub>):  $\delta$  168.5, 150.2, 149.4, 149.0, 141.5, 136.5, 133.7, 133.6, 131.1, 128.7, 126.6, 124.4, 119.8, 93.3, 33.0, 30.4; HRMS (ESI)  $m/z$  calcd. For C<sub>21</sub>H<sub>20</sub>ClN<sub>4</sub> [M+H]<sup>+</sup> 363.1371, found 363.1374.

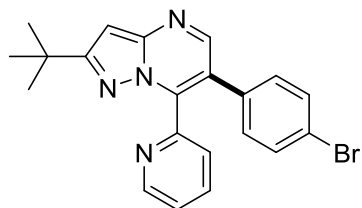

**6-(4-Bromophenyl)-2-(tert-butyl)-7-(pyridin-2-yl)pyrazolo[1,5-a]pyrimidine (4ad):** The title compound was obtained as a pale yellow solid in 46% yield according to the GP3. <sup>1</sup>H NMR (500 MHz, CDCl<sub>3</sub>):  $\delta$  8.63 (s, 1H), 8.51 (s, 1H), 7.81 (t,  $J$  = 7.3 Hz, 1H), 7.66 (d,  $J$  = 7.6 Hz, 1H), 7.38 (d,  $J$  = 8.0 Hz, 3H), 7.03 (d,  $J$  = 8.1 Hz, 2H), 6.65 (s, 1H), 1.34 (s, 9H); <sup>13</sup>C NMR (125 MHz, CDCl<sub>3</sub>):  $\delta$  168.4, 150.1, 149.8, 149.5, 149.1, 141.6, 136.4, 134.1, 131.6, 131.5, 126.5, 124.4, 121.9, 119.8, 93.3, 33.0, 30.4; HRMS (ESI)  $m/z$  calcd. For C<sub>21</sub>H<sub>20</sub>BrN<sub>4</sub> [M+H]<sup>+</sup> 407.0866, found 407.0874.

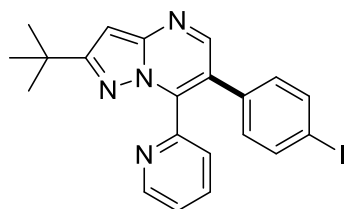

**2-(tert-Butyl)-6-(4-iodophenyl)-7-(pyridin-2-yl)pyrazolo[1,5-a]pyrimidine (4ae):** The title compound was obtained as a pale yellow solid in 40% yield according to the GP3. <sup>1</sup>H NMR (500 MHz, CDCl<sub>3</sub>):  $\delta$  8.65 (d,  $J$  = 3.3 Hz, 1H), 8.51 (s, 1H), 7.84 (t,  $J$  = 7.6 Hz, 1H), 7.68 (d,  $J$  = 7.8 Hz, 1H), 7.59 (d,  $J$  = 8.2 Hz, 2H), 7.40 (dd,  $J$  = 6.9, 4.0 Hz, 1H), 6.90 (d,  $J$  = 8.2 Hz, 2H), 6.66 (s, 1H), 1.34 (s, 9H); <sup>13</sup>C NMR (125 MHz, CDCl<sub>3</sub>):  $\delta$  168.5, 150.1, 149.4, 149.2, 149.0, 141.2, 137.6, 136.7, 134.6, 131.6, 126.6, 124.5, 119.9, 93.6, 93.4, 33.0, 30.3; HRMS (ESI)  $m/z$  calcd. For C<sub>21</sub>H<sub>20</sub>IN<sub>4</sub> [M+H]<sup>+</sup> 455.0727, found 455.0729.

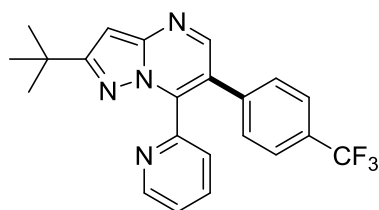

**2-(tert-Butyl)-7-(pyridin-2-yl)-6-(4-(trifluoromethyl)phenyl)pyrazolo[1,5-a]pyrimidine (4af):** The title compound was obtained as a pale yellow solid in 39% yield according to the GP3. <sup>1</sup>H NMR (500 MHz, CDCl<sub>3</sub>):  $\delta$  8.62 (d,  $J$  = 4.0 Hz, 1H), 8.54 (s, 1H), 7.85 (t,  $J$  = 7.6 Hz, 1H), 7.75 (d,  $J$  = 7.8 Hz, 1H), 7.52 (d,  $J$  = 8.0 Hz, 2H), 7.44 – 7.37 (m, 1H), 7.29 (d,  $J$  = 8.1 Hz, 2H), 6.68 (s, 1H), 1.35 (s, 9H); <sup>13</sup>C NMR (125 MHz, CDCl<sub>3</sub>):  $\delta$  168.8, 150.0, 149.4, 149.1, 140.3, 138.9, 136.6, 130.2, 129.5 (q,  $J$  = 32.8 Hz), 126.7, 125.4 (q,  $J$  = 3.8 Hz), 124.6, 124.0 (q,  $J$  = 272.1 Hz), 119.6, 100.0, 93.5, 33.0, 30.4; HRMS (ESI)  $m/z$  calcd. For C<sub>22</sub>H<sub>20</sub>F<sub>3</sub>N<sub>4</sub> [M+H]<sup>+</sup> 397.1635, found 397.1644.

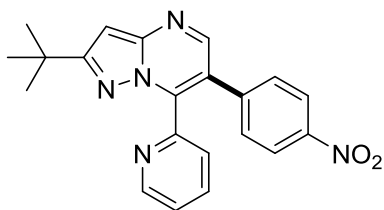

**2-(tert-Butyl)-6-(4-nitrophenyl)-7-(pyridin-2-yl)pyrazolo[1,5-a]pyrimidine (4ag):** The title compound was obtained as a pale yellow solid in 36% yield according to the GP3.  $^1\text{H}$  NMR (500 MHz,  $\text{CDCl}_3$ ):  $\delta$  8.58 (d,  $J = 4.6$  Hz, 1H), 8.54 (s, 1H), 8.13 (d,  $J = 8.7$  Hz, 2H), 7.92 – 7.84 (m, 2H), 7.41 (t,  $J = 5.1$  Hz, 1H), 7.33 (d,  $J = 8.7$  Hz, 2H), 6.70 (s, 1H), 1.36 (s, 9H);  $^{13}\text{C}$  NMR (125 MHz,  $\text{CDCl}_3$ ):  $\delta$  169.1, 149.5, 149.3, 148.8, 146.9, 142.4, 142.0, 136.5, 130.7, 126.8, 124.8, 123.6, 118.9, 93.8, 33.0, 30.0; HRMS (ESI)  $m/z$  calcd. For  $\text{C}_{21}\text{H}_{20}\text{N}_5\text{O}_2$   $[\text{M}+\text{H}]^+$  374.1612, found 374.1628.

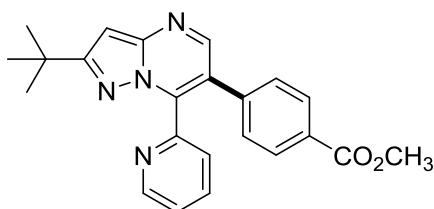

**Methyl 4-(2-(tert-butyl)-7-(pyridin-2-yl)pyrazolo[1,5-a]pyrimidin-6-yl)benzoate (4ah):** The title compound was obtained as a pale yellow solid in 42% yield according to the GP3.  $^1\text{H}$  NMR (500 MHz,  $\text{CDCl}_3$ ):  $\delta$  8.58 (d,  $J = 4.7$  Hz, 1H), 8.56 (s, 1H), 7.95 – 7.90 (m, 2H), 7.79 (td,  $J = 7.7, 1.6$  Hz, 1H), 7.70 (d,  $J = 7.8$  Hz, 1H), 7.33 (ddd,  $J = 7.5, 4.8, 0.8$  Hz, 1H), 7.25 – 7.19 (m, 2H), 6.66 (s, 1H), 3.90 (s, 3H), 1.35 (s, 9H);  $^{13}\text{C}$  NMR (125 MHz,  $\text{CDCl}_3$ ):  $\delta$  168.6, 166.7, 150.1, 149.6, 149.2, 141.9, 140.1, 136.2, 129.8, 129.6, 128.9, 126.5, 124.4, 119.9, 93.4, 52.2, 33.0, 30.5, 30.4; HRMS (ESI)  $m/z$  calcd. For  $\text{C}_{23}\text{H}_{23}\text{N}_4\text{O}_2$   $[\text{M}+\text{H}]^+$  387.1816, found 387.1832.

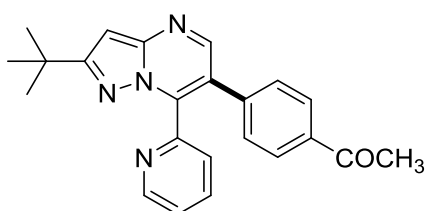

**1-(4-(2-(tert-Butyl)-7-(pyridin-2-yl)pyrazolo[1,5-a]pyrimidin-6-yl)phenyl)ethan-1-one (4ai):** The title compound was obtained as a pale yellow solid in 40% yield according to the GP3.  $^1\text{H}$  NMR (500 MHz,  $\text{CDCl}_3$ ):  $\delta$  8.59 (d,  $J = 3.5$  Hz, 1H), 8.56 (s, 1H), 7.85 (d,  $J = 8.2$  Hz, 2H), 7.81 (t,  $J = 7.6$  Hz, 1H), 7.74 (t,  $J = 8.7$  Hz, 1H), 7.40 – 7.30 (m, 1H), 7.25 (d,  $J = 8.2$  Hz, 2H), 6.67 (s, 1H), 2.58 (s, 3H), 1.35 (s, 9H);  $^{13}\text{C}$  NMR (125 MHz,  $\text{CDCl}_3$ ):  $\delta$  197.6, 168.6, 150.0, 149.4, 149.2, 141.9, 140.3, 136.2, 135.7, 130.0, 128.4, 126.6, 124.4, 119.8, 93.5, 33.0, 30.4, 26.7; HRMS (ESI)  $m/z$  calcd. For  $\text{C}_{23}\text{H}_{23}\text{N}_4\text{O}$   $[\text{M}+\text{H}]^+$  371.1866, found 371.1876.

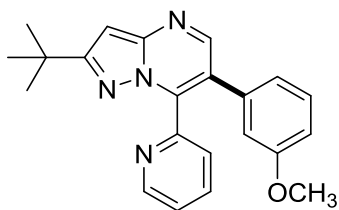

**2-(tert-Butyl)-6-(3-methoxyphenyl)-7-(pyridin-2-yl)pyrazolo[1,5-a]pyrimidine (4aj):** The title compound was obtained as a pale yellow solid in 55% yield according to the GP3.  $^1\text{H}$  NMR (500 MHz,  $\text{CDCl}_3$ ):  $\delta$  8.67 (dd,  $J = 3.4, 0.9$  Hz, 1H), 8.57 (s, 1H), 7.76 (td,  $J = 7.7, 1.7$  Hz, 1H), 7.57 (d,  $J = 7.8$  Hz, 1H), 7.34 (ddd,  $J = 7.6, 4.9, 1.1$  Hz, 1H), 7.17 (t,  $J = 7.9$  Hz, 1H), 6.82 – 6.73 (m, 2H), 6.70 – 6.66 (m, 1H), 6.64 (s, 1H), 3.65 (s, 3H), 1.34 (s, 9H);  $^{13}\text{C}$  NMR (125 MHz,  $\text{CDCl}_3$ ):  $\delta$  168.2, 159.4, 150.5, 150.0, 149.5, 149.0, 141.6, 136.3, 136.3, 129.4, 126.3, 124.1, 122.2, 120.7, 115.2, 113.5, 93.1, 55.1, 33.0, 30.4; HRMS (ESI)  $m/z$  calcd. For  $\text{C}_{22}\text{H}_{23}\text{N}_4\text{O}$   $[\text{M}+\text{H}]^+$  359.1866, found 359.1855.

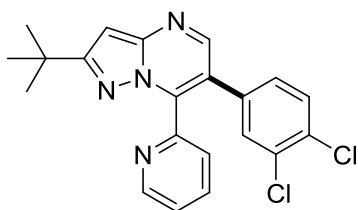

**2-(tert-Butyl)-6-(3,4-dichlorophenyl)-7-(pyridin-2-yl)pyrazolo[1,5-a]pyrimidine (4al):** The title compound was obtained as a pale yellow solid in 44% yield according to the GP3.  $^1\text{H}$  NMR (500 MHz,  $\text{CDCl}_3$ ):  $\delta$  8.66 (d,  $J = 4.2$  Hz, 1H), 8.51 (s, 1H), 7.90 (t,  $J = 7.7$  Hz, 1H), 7.77 (d,  $J = 7.8$  Hz, 1H), 7.44 (dd,  $J = 7.2, 4.7$  Hz, 1H), 7.32 (d,  $J = 8.3$  Hz, 1H), 7.28 (d,  $J = 1.9$  Hz, 1H), 6.98 (dd,  $J = 8.3, 2.0$  Hz, 1H), 6.68 (s, 1H), 1.35 (s, 9H);  $^{13}\text{C}$  NMR (125 MHz,  $\text{CDCl}_3$ ):  $\delta$  168.8, 149.7, 149.2, 149.0, 148.6, 137.0, 135.0, 132.6, 132.0, 131.6, 130.4, 129.2, 126.8, 124.8, 118.8, 93.6, 33.1, 30.3; HRMS (ESI)  $m/z$  calcd. For  $\text{C}_{21}\text{H}_{19}\text{Cl}_2\text{N}_4$   $[\text{M}+\text{H}]^+$  397.0981, found 397.0999.

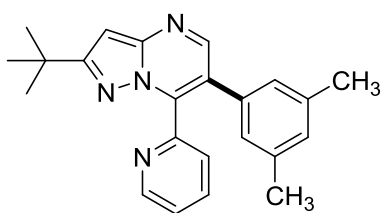

**2-(tert-Butyl)-6-(3,5-dimethylphenyl)-7-(pyridin-2-yl)pyrazolo[1,5-a]pyrimidine (4am):** The title compound was obtained as a pale yellow solid in 44% yield according to the GP3.  $^1\text{H}$  NMR (500 MHz,  $\text{CDCl}_3$ ):  $\delta$  8.66 (d,  $J = 4.2$  Hz, 1H), 8.56 (s, 1H), 7.80 (t,  $J = 7.6$  Hz, 1H), 7.61 (d,  $J = 7.8$  Hz, 1H), 7.40 – 7.33 (m, 1H), 6.87 (s, 1H), 6.75 (s, 2H), 6.63 (s, 1H), 2.20 (s, 6H), 1.34 (s, 9H);  $^{13}\text{C}$  NMR (125 MHz,  $\text{CDCl}_3$ ):  $\delta$  168.1, 150.7, 149.8, 149.2, 148.8, 141.2, 137.9, 136.5, 134.6, 129.1, 127.6, 126.5, 124.1, 121.1, 93.0, 33.0, 30.4, 21.2; HRMS (ESI)  $m/z$  calcd. For  $\text{C}_{23}\text{H}_{25}\text{N}_4$   $[\text{M}+\text{H}]^+$  357.2074, found 357.2086.

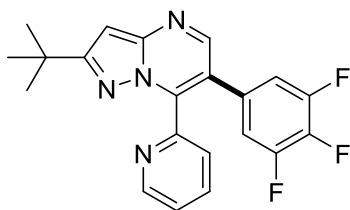

**2-(*tert*-Butyl)-7-(pyridin-2-yl)-6-(3,4,5-trifluorophenyl)pyrazolo[1,5-a]pyrimidine (4an):** The title compound was obtained as a pale yellow solid in 37% yield according to the GP3.  $^1\text{H}$  NMR (500 MHz,  $\text{CDCl}_3$ ):  $\delta$  8.65 (d,  $J$  = 4.4 Hz, 1H), 8.48 (s, 1H), 7.91 (dt,  $J$  = 7.7, 3.9 Hz, 1H), 7.81 (d,  $J$  = 7.8 Hz, 1H), 7.44 (dd,  $J$  = 6.8, 4.9 Hz, 1H), 6.80 (dd,  $J$  = 8.1, 6.5 Hz, 2H), 6.68 (s, 1H), 1.34 (s, 9H);  $^{13}\text{C}$  NMR (125 MHz,  $\text{CDCl}_3$ ):  $\delta$  169.0, 150.0 (dd,  $J$  = 13.7, 4.0 Hz), 149.5, 149.4, 149.1, 148.5, 148.0 (dd,  $J$  = 6.1, 3.8 Hz), 141.5, 136.9, 126.7, 124.9, 118.3, 114.2 (dd,  $J$  = 16.7, 5.2 Hz), 99.7, 93.8, 33.1, 30.3; HRMS (ESI)  $m/z$  calcd. For  $\text{C}_{21}\text{H}_{18}\text{F}_3\text{N}_4$   $[\text{M}+\text{H}]^+$  383.1478, found 383.1488.

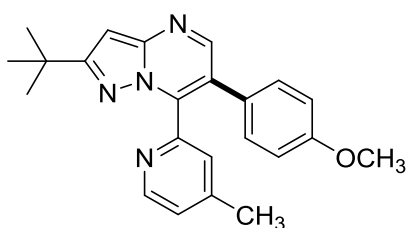

**2-(*tert*-Butyl)-6-(4-methoxyphenyl)-7-(4-methylpyridin-2-yl)pyrazolo[1,5-a]pyrimidine (4ba):** The title compound was obtained as a pale yellow solid in 32% yield according to the GP3.  $^1\text{H}$  NMR (500 MHz,  $\text{CDCl}_3$ ):  $\delta$  8.53 (s, 1H), 8.10 (d,  $J$  = 6.9 Hz, 1H), 7.42 (s, 1H), 7.19 (d,  $J$  = 4.1 Hz, 1H), 7.10 (d,  $J$  = 8.7 Hz, 2H), 6.80 (d,  $J$  = 8.7 Hz, 2H), 6.62 (s, 1H), 3.78 (s, 3H), 2.39 (s, 3H), 1.34 (s, 9H);  $^{13}\text{C}$  NMR (125 MHz,  $\text{CDCl}_3$ ):  $\delta$  167.9, 165.1, 158.9, 150.8, 148.8, 131.0, 129.8, 129.3, 127.3, 125.2, 113.9, 113.1, 93.0, 55.2, 32.9, 30.4, 21.3; HRMS (ESI)  $m/z$  calcd. For  $\text{C}_{23}\text{H}_{25}\text{N}_4\text{O}$   $[\text{M}+\text{H}]^+$  373.2023, found 373.2041.

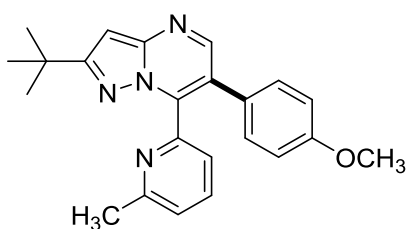

**2-(*tert*-Butyl)-6-(4-methoxyphenyl)-7-(6-methylpyridin-2-yl)pyrazolo[1,5-a]pyrimidine (4ca):** The title compound was obtained as a pale yellow solid in 41% yield according to the GP3.  $^1\text{H}$  NMR (500 MHz,  $\text{CDCl}_3$ ):  $\delta$  8.52 (s, 1H), 7.61 (t,  $J$  = 7.7 Hz, 1H), 7.29 (d,  $J$  = 7.7 Hz, 1H), 7.17 (d,  $J$  = 7.8 Hz, 1H), 7.14 – 7.06 (m, 2H), 6.79 (t,  $J$  = 5.8 Hz, 2H), 6.60 (s, 1H), 3.77 (s, 3H), 2.52 (s, 3H), 1.33 (s, 9H);  $^{13}\text{C}$  NMR (125 MHz,  $\text{CDCl}_3$ ):  $\delta$  167.9, 158.9, 158.4, 150.7, 149.4, 149.0, 141.6, 136.5, 131.0, 127.4, 123.6, 123.2, 120.5, 113.8, 92.9, 55.2, 32.9, 30.4, 24.4; HRMS (ESI)  $m/z$  calcd. For  $\text{C}_{23}\text{H}_{25}\text{N}_4\text{O}$   $[\text{M}+\text{H}]^+$  373.2023, found 373.2014.



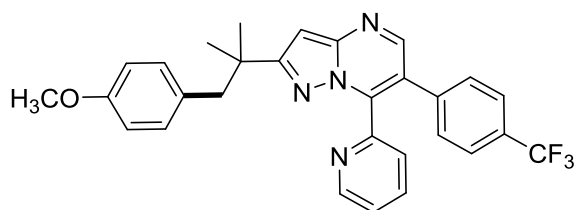

**2-(1-(4-Methoxyphenyl)-2-methylpropan-2-yl)-7-(pyridin-2-yl)-6-(4-(trifluoromethyl)phenyl)**

**pyrazolo[1,5-a]pyrimidine (5):** The title compound was obtained as a pale yellow solid in 42% yield from **4af** according to the GP2.  $^1\text{H}$  NMR (500 MHz,  $\text{CDCl}_3$ ):  $\delta$  8.62 (d,  $J$  = 4.9 Hz, 1H), 8.55 (s, 1H), 7.88 (t,  $J$  = 7.7 Hz, 1H), 7.74 (d,  $J$  = 7.8 Hz, 1H), 7.54 (d,  $J$  = 8.2 Hz, 2H), 7.45 – 7.40 (m, 1H), 7.31 (d,  $J$  = 8.2 Hz, 2H), 6.86 (d,  $J$  = 8.6 Hz, 2H), 6.76 – 6.68 (m, 2H), 6.59 (s, 1H), 3.76 (s, 3H), 2.90 (s, 2H), 1.31 (s, 6H);  $^{13}\text{C}$  NMR (125 MHz,  $\text{CDCl}_3$ ):  $\delta$  167.4, 157.9, 149.9, 148.89, 148.87, 138.7, 137.2, 131.4, 130.8, 130.2, 129.7 (q,  $J$  = 32.7 Hz), 126.98, 126.97, 125.4 (q,  $J$  = 3.6 Hz), 124.89, 124.88, 123.9 (q,  $J$  = 273.7 Hz), 119.9, 113.0, 94.8, 55.2, 48.2, 37.4, 27.6; HRMS (ESI)  $m/z$  calcd. For  $\text{C}_{29}\text{H}_{26}\text{F}_3\text{N}_4\text{O}$   $[\text{M}+\text{H}]^+$  503.2053, found 503.2066.

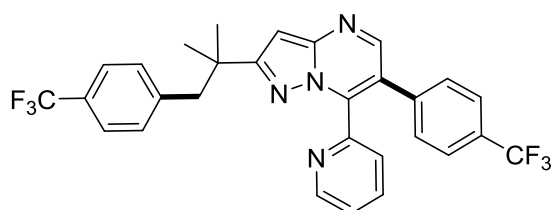

**2-(2-Methyl-1-(4-(trifluoromethyl)phenyl)propan-2-yl)-7-(pyridin-2-yl)-6-(4-(trifluoromethyl)phenyl)**

**pyrazolo[1,5-a]pyrimidine (6):** The title compound was obtained as a pale yellow solid in 26% yield from **3af** according to the GP3. This compound could also be prepared directly from **1a** by reaction at 120 °C for 36h and then at 140 °C for 48h with the yield of 23% according to the GP2 and GP3.  $^1\text{H}$  NMR (500 MHz,  $\text{CDCl}_3$ ):  $\delta$  8.61 (d,  $J$  = 4.5 Hz, 1H), 8.57 (s, 1H), 7.86 – 7.78 (m, 1H), 7.61 (d,  $J$  = 7.8 Hz, 1H), 7.53 (d,  $J$  = 8.1 Hz, 2H), 7.43 – 7.36 (m, 3H), 7.30 (d,  $J$  = 8.1 Hz, 2H), 7.02 (d,  $J$  = 8.0 Hz, 2H), 6.60 (s, 1H), 3.02 (s, 2H), 1.35 (s, 6H);  $^{13}\text{C}$  NMR (125 MHz,  $\text{CDCl}_3$ ):  $\delta$  166.3, 150.3, 149.6, 149.1, 149.0, 142.9, 141.8, 138.7, 136.5, 130.8, 130.1, 129.6 (q,  $J$  = 32.8 Hz), 128.2 (q,  $J$  = 31.5 Hz), 126.5, 125.4 (q,  $J$  = 3.6 Hz), 124.6, 124.4 (q,  $J$  = 272.1 Hz), 124.38 (q,  $J$  = 3.8 Hz), 123.9 (q,  $J$  = 273.4 Hz), 119.9, 94.6, 48.8, 37.3, 27.9; HRMS (ESI)  $m/z$  calcd. For  $\text{C}_{29}\text{H}_{23}\text{F}_6\text{N}_4$   $[\text{M}+\text{H}]^+$  541.1821, found 541.1838.

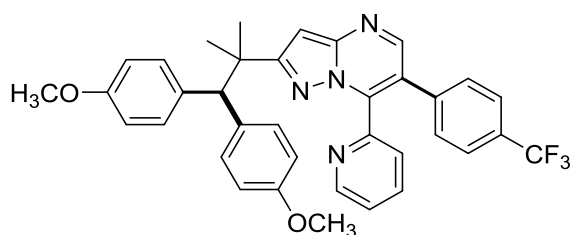

**2-(1,1-bis(4-Methoxyphenyl)-2-methylpropan-2-yl)-7-(pyridin-2-yl)-6-(4-(trifluoromethyl)phenyl)**

**pyrazolo[1,5-a]pyrimidine (7):** The title compound was obtained as a pale yellow solid from **8** in 31%

yield according to the GP2.  $^1\text{H}$  NMR (500 MHz,  $\text{CDCl}_3$ ):  $\delta$  8.59 – 8.55 (m, 1H), 8.53 (s, 1H), 7.83 (td,  $J$  = 7.8, 1.7 Hz, 1H), 7.60 (d,  $J$  = 7.9 Hz, 1H), 7.53 (d,  $J$  = 8.2 Hz, 2H), 7.44 – 7.37 (m, 1H), 7.30 (d,  $J$  = 8.0 Hz, 3H), 7.14 – 7.08 (m, 4H), 6.74 – 6.68 (m, 4H), 6.47 (s, 1H), 4.25 (s, 1H), 3.74 (s, 6H), 1.42 (s, 6H);  $^{13}\text{C}$  NMR (125 MHz,  $\text{CDCl}_3$ ):  $\delta$  166.3, 157.7, 150.0, 148.9, 148.5, 141.0, 138.7, 136.87, 136.88, 134.9, 131.0, 130.2, 129.5 (q,  $J$  = 32.2 Hz), 127.0, 125.4 (q,  $J$  = 3.8 Hz), 124.8, 124.4 (q,  $J$  = 272.1 Hz), 119.7, 113.0, 96.0, 61.1, 55.1, 40.5, 28.0; HRMS (ESI)  $m/z$  calcd. For  $\text{C}_{36}\text{H}_{32}\text{F}_3\text{N}_4\text{O}_2$   $[\text{M}+\text{H}]^+$  609.2472, found 609.2483.

## 6. Mechanistic Studies

### 6.1 Model Substrate for Function Confirmation of the Pyridine Nitrogen

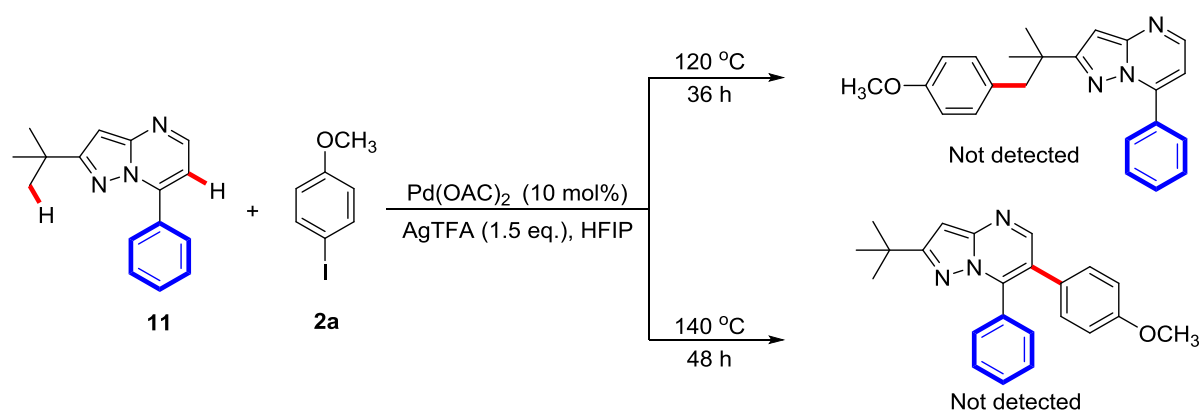

Figure S2 | Model substrate for function confirmation of the pyridine nitrogen

### 6.2 H/D exchange reaction

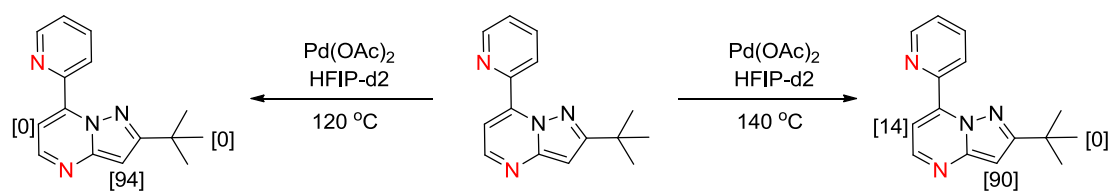

Figure S3 | H/D exchange reaction

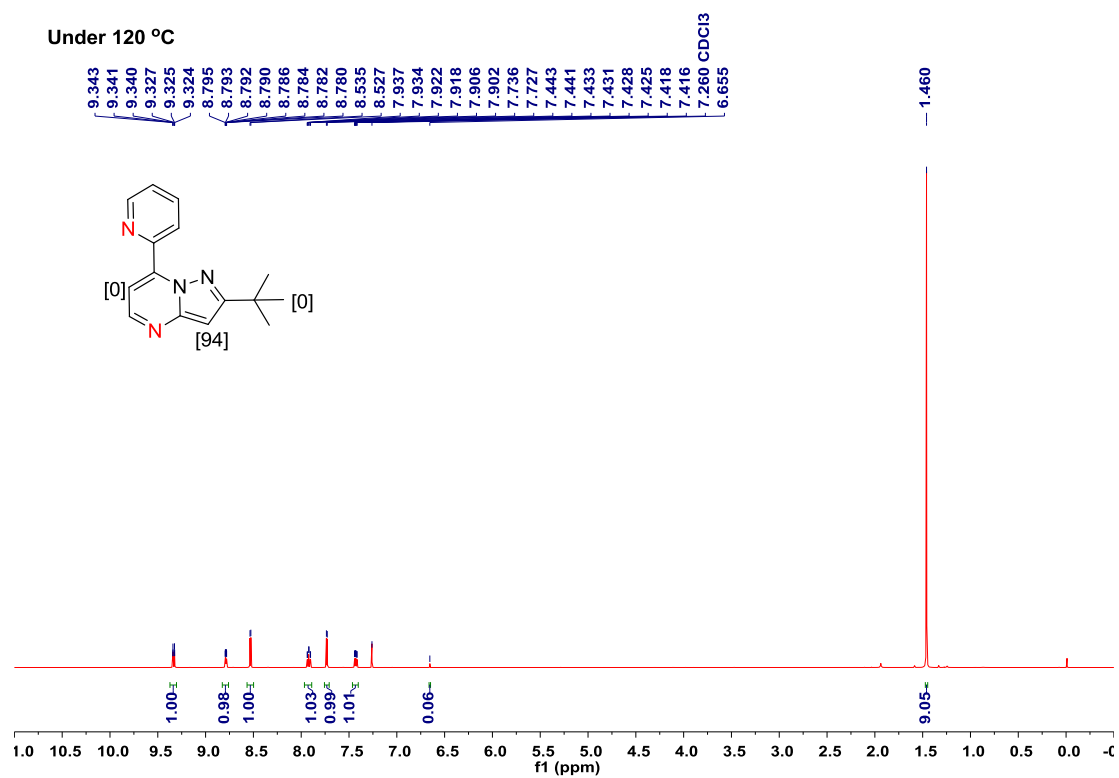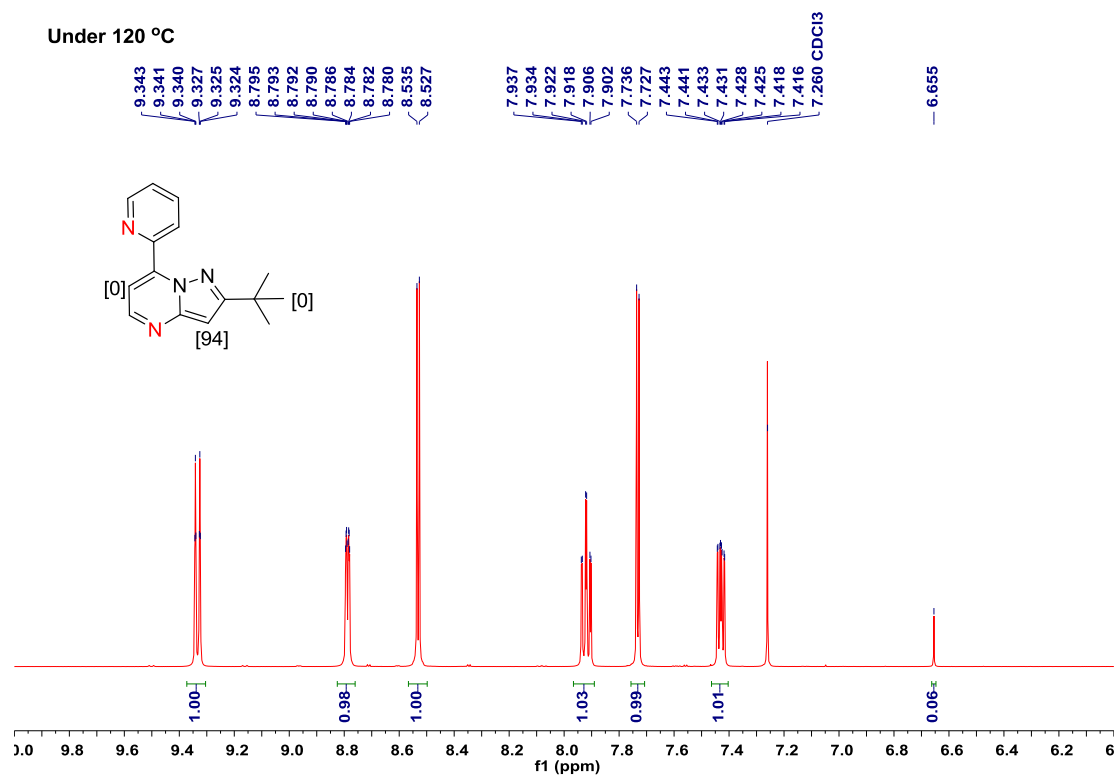

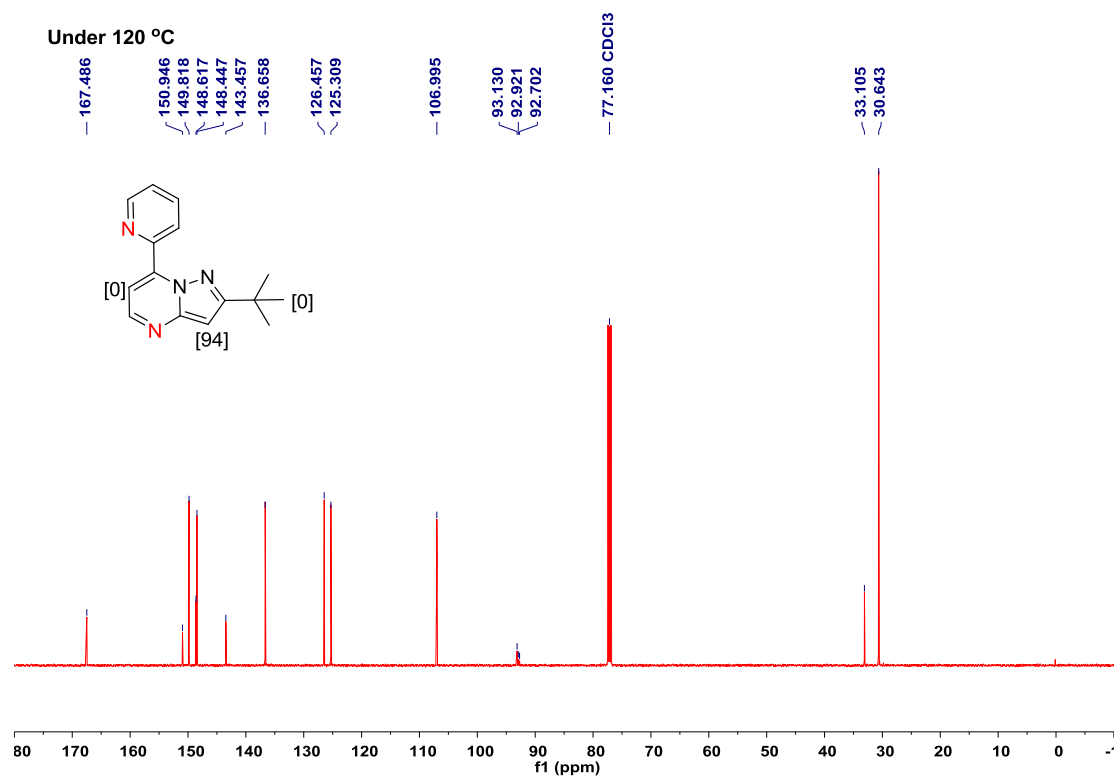

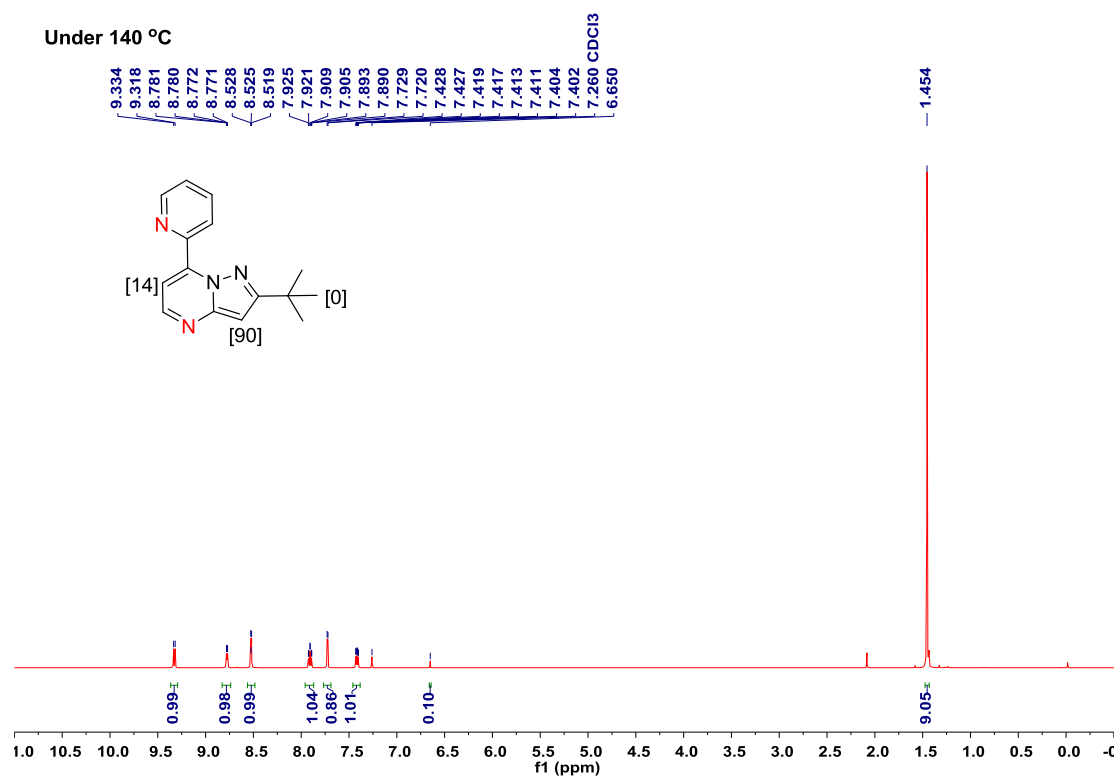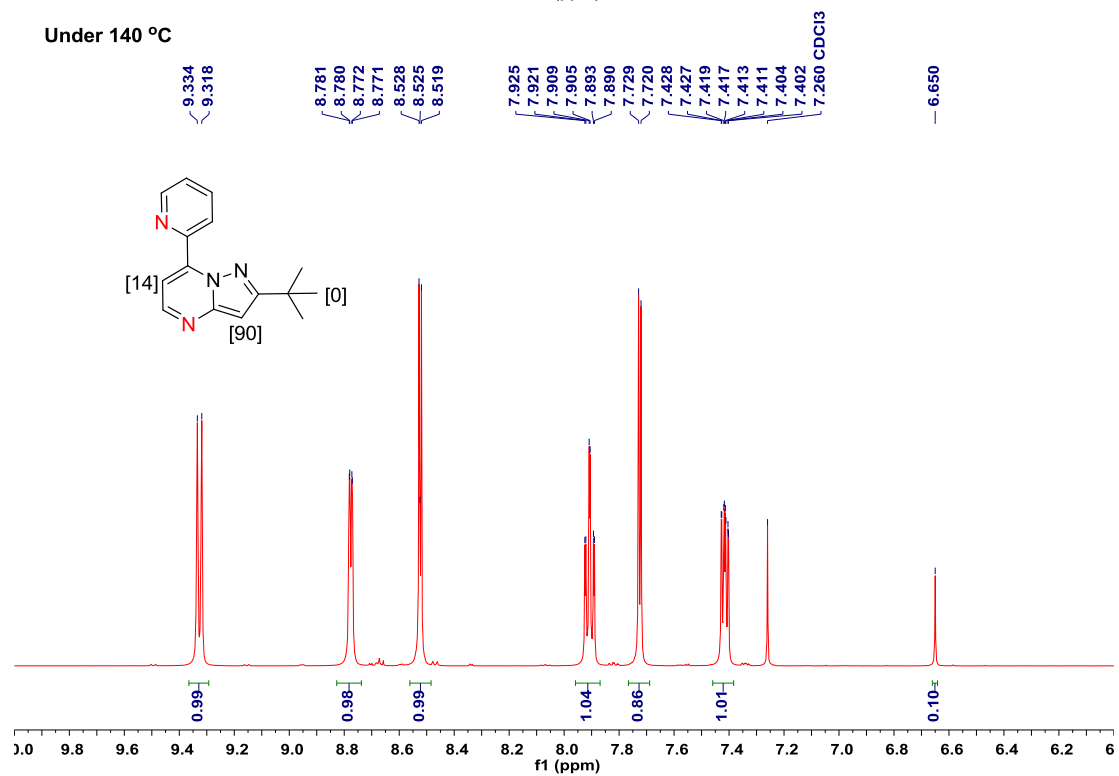

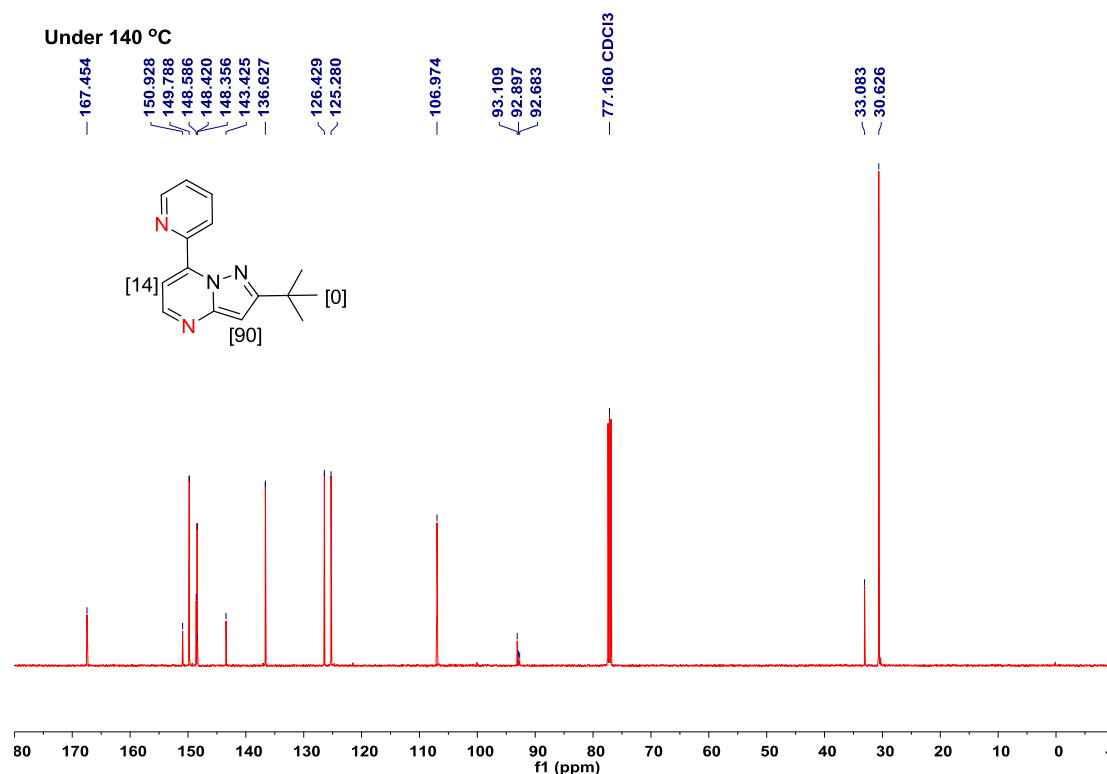

### 6.3 Preparation of the [6, 5]-Fused Palladacycle Intermediate for the C(sp<sup>3</sup>)-H Arylation

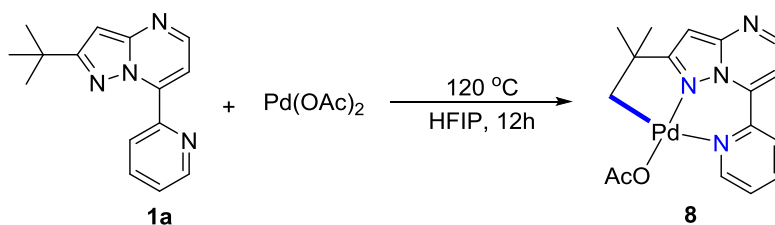

A 25 mL sealed tube was charged with 7-pyridyl-pyrazolo[1, 5-a]pyrimidine **1a** (302 mg, 1.2 mmol), Pd(OAc)<sub>2</sub> (224 mg, 1 mmol) and HFIP (10 mL). The mixture was then stirred at 120 °C for 12 hours. After cooling to ambient temperature, the reaction mixture was evaporated to remove the solvent. The solid obtained was washed with ether to remove excess **1a**. Analytically pure **8** (212 mg, 51% yield) was obtained by recrystallization using chloroform and ethyl acetate. The nice crystal of **8** was also subjected to the X-ray Analysis.

<sup>1</sup>H NMR (500 MHz, CDCl<sub>3</sub>): δ 8.69 (dd, *J* = 5.2, 1.5 Hz, 1H), 8.62 (d, *J* = 4.8 Hz, 1H), 8.51 (d, *J* = 8.3 Hz, 1H), 8.31 (d, *J* = 4.8 Hz, 1H), 7.86 (td, *J* = 8.1, 1.8 Hz, 1H), 7.35 (ddd, *J* = 7.4, 5.3, 0.9 Hz, 1H), 6.50 (s, 1H), 2.56 (s, 2H), 2.17 (s, 3H), 1.46 (d, *J* = 6.0 Hz, 6H); <sup>13</sup>C NMR (125 MHz, CDCl<sub>3</sub>): δ 178.1, 175.2, 151.0, 149.7, 149.3, 144.5, 139.1, 138.1, 126.4, 126.0, 109.9, 93.8, 42.2, 33.3, 29.6, 24.1.

#### 6.4 Preparation of the 16-Membered tetramer Intermediate for the C(sp<sup>2</sup>)-H Arylation

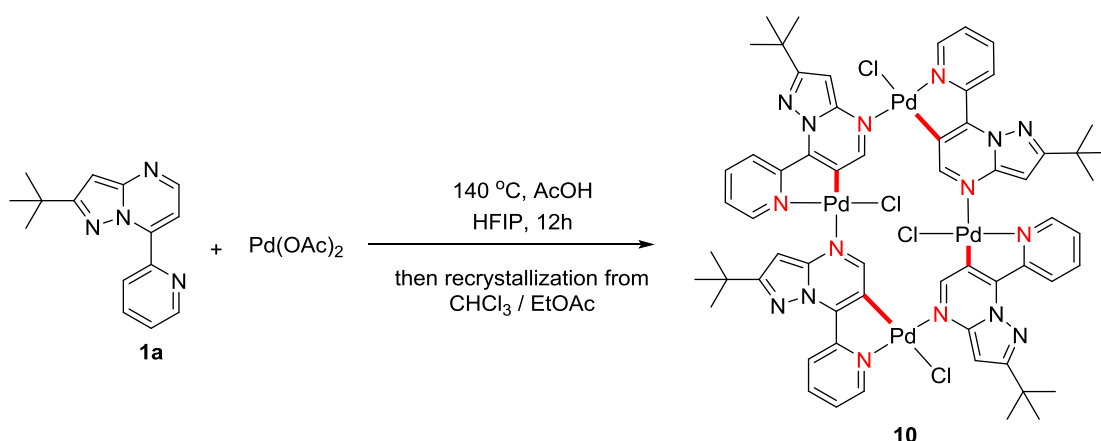

A 25 mL sealed tube was charged with 7-pyridyl-pyrazolo[1, 5-a]pyrimidine **1a** (504 mg, 2 mmol),  $\text{Pd}(\text{OAc})_2$  (224 mg, 1 mmol),  $\text{AcOH}$  (2 mL) and  $\text{HFIP}$  (10 mL). The mixture was then stirred at  $140\text{ }^\circ\text{C}$  for 12 hours. After cooling to ambient temperature, the reaction mixture was evaporated to remove the solvent. The solid obtained was washed with ether to remove excess **1a**. Analytically pure **10** (138 mg, 35% yield) was obtained by recrystallization using chloroform and ethyl acetate.<sup>3</sup> The nice crystal of **10** was also subjected to the X-ray Analysis.

$^1\text{H}$  NMR (500 MHz,  $\text{CDCl}_3$ ):  $\delta$  9.70 (dd,  $J = 8.1, 0.9$  Hz, 1H), 9.59 (dd,  $J = 5.6, 1.1$  Hz, 1H), 8.11 (td,  $J = 7.9, 1.7$  Hz, 1H), 7.52 (s, 1H), 7.47 – 7.39 (m, 1H), 7.14 (s, 1H), 1.37 (s, 9H);  $^{13}\text{C}$  NMR (125 MHz,  $\text{CDCl}_3$ ):  $\delta$  166.8, 156.3, 152.0, 151.0, 146.8, 146.5, 139.2, 127.8, 125.4, 124.8, 95.2, 32.2, 29.4.

#### 6.5 Preparation of the Shared Intermediate for the C(sp<sup>2</sup>)-H and C(sp<sup>3</sup>)-H Arylation

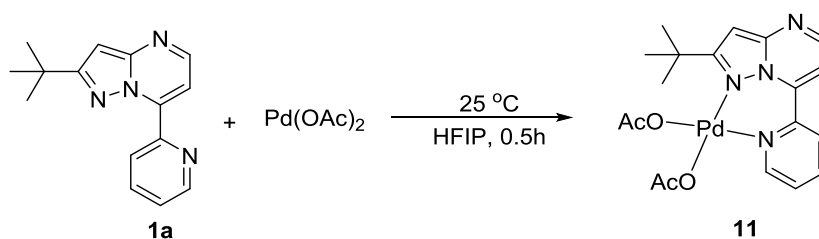

A 25 mL sealed tube was charged with 7-pyridyl-pyrazolo[1, 5-a]pyrimidine **1a** (302 mg, 1.2 mmol),  $\text{Pd}(\text{OAc})_2$  (224 mg, 1 mmol) and  $\text{HFIP}$  (10 mL). The mixture was then stirred at  $25\text{ }^\circ\text{C}$  for 0.5 hour. Upon completion, the reaction mixture was evaporated under  $25\text{ }^\circ\text{C}$  to remove the solvent. The solid obtained was washed with ether to remove excess **1a**. Analytically pure **11** (253 mg, 53% yield) was obtained by recrystallization using chloroform and ethyl acetate.

$^1\text{H}$  NMR (500 MHz,  $\text{CDCl}_3$ ):  $\delta$  8.92 (dd,  $J = 7.2, 0.5$  Hz, 1H), 8.80 (d,  $J = 7.3$  Hz, 1H), 8.64 (d,  $J = 7.9$  Hz, 1H), 8.15 (dd,  $J = 5.6, 1.2$  Hz, 1H), 7.57 (td,  $J = 7.9, 1.4$  Hz, 1H), 7.26 – 7.21 (m, 1H), 7.07 (s, 1H), 2.22 (s, 3H), 2.20 (s, 3H), 1.41 (s, 9H);  $^{13}\text{C}$  NMR (125 MHz,  $\text{CDCl}_3$ ):  $\delta$  178.8, 178.4, 171.4, 154.7, 153.9, 149.9, 146.3, 139.5, 139.4, 126.7, 125.8, 104.7, 94.7, 33.3, 30.2, 23.3, 23.2.



## 6.6 Transformation of the Shared Intermediate **13** to **10** for the C(sp<sup>3</sup>)-H Arylation

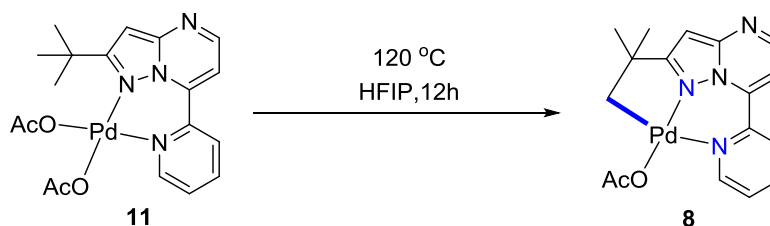

A 10 mL sealed tube was charged with **11** (48 mg, 0.1 mmol) and HFIP (2 mL). The mixture was then stirred at 120 °C for 12 hours. After cooling to ambient temperature, the reaction mixture was evaporated to remove the solvent. The solid obtained was washed with ether. Analytically pure **8** (37 mg, 89% yield) was obtained by recrystallization using chloroform and ethyl acetate.

## 6.7 Transformation of the Shared Intermediate **11** to **10** for the C(sp<sup>2</sup>)-H Arylation

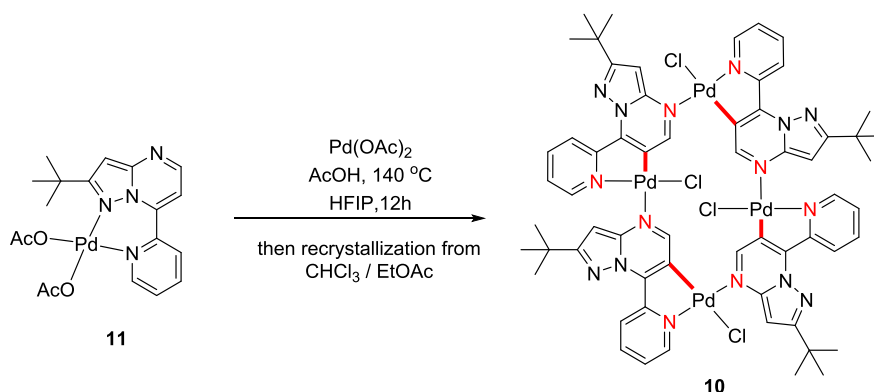

A 10 mL sealed tube was charged with **13** (48mg, 0.1 mmol), Pd(OAc)<sub>2</sub> (2mg, 0.01 mmol), AcOH (0.4 mL) and HFIP (2 mL). The mixture was then stirred at 140 °C for 12 hours. After cooling to ambient temperature, the reaction mixture was evaporated to remove the solvent. The solid obtained was washed with ether. Analytically pure **12** (23 mg, 59% yield) was obtained by recrystallization using chloroform and ethyl acetate.

## 6.8 Conversion of the C(sp<sup>3</sup>)-H Arylation Intermediate **8** to the C(sp<sup>2</sup>)-H Activation Intermediate **10**

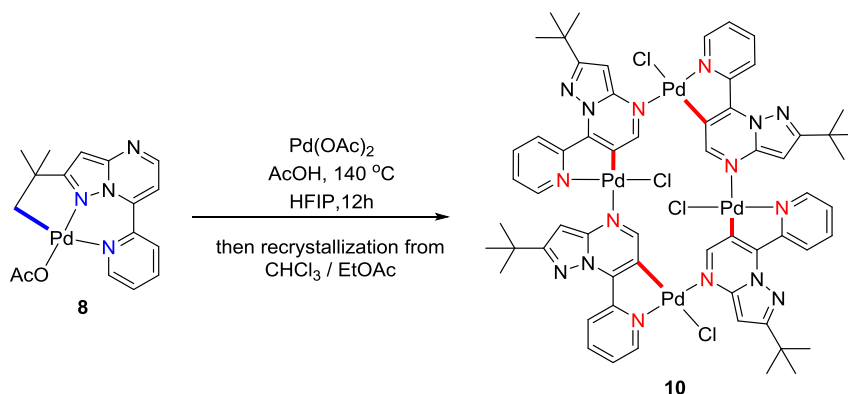

A 10 mL sealed tube was charged with **8** (42 mg, 0.1 mmol), Pd(OAc)<sub>2</sub> (2 mg, 0.01 mmol), AcOH (0.4 mL) and HFIP (2 mL). The mixture was then stirred at 140 °C for 12 hours. After cooling to ambient temperature, the reaction mixture was evaporated to remove the solvent. The solid obtained was washed with ether. Analytically pure **10** (25 mg, 64% yield) was obtained by recrystallization using chloroform and ethyl acetate.

#### 6.9 General procedure for schemes 5b to 5e

A 10 mL sealed tube was charged with metal complex (**8** or **10** or **11**) (0.1 mmol), **2a** (0.1 mmol), AgTFA (0.15 mmol) and HFIP (2 mL). The mixture was then stirred at 120 °C for C(sp<sup>3</sup>)-H arylation, 36 h and at 140 °C for C(sp<sup>2</sup>)-H arylation, 48 h. Upon completion, the reaction mixture was cooled to room temperature and diluted with DCM. Then the reaction mixture was filtered through a pad of celite, which was further washed with DCM. The solvent was removed under vacuum directly and the obtained crude product was purified by silica gel column chromatography to afford the desired products **3aa** or **4aa**.

## 7. X-ray Crystallographic Data

### 7.1 Crystal Structure of 3ac

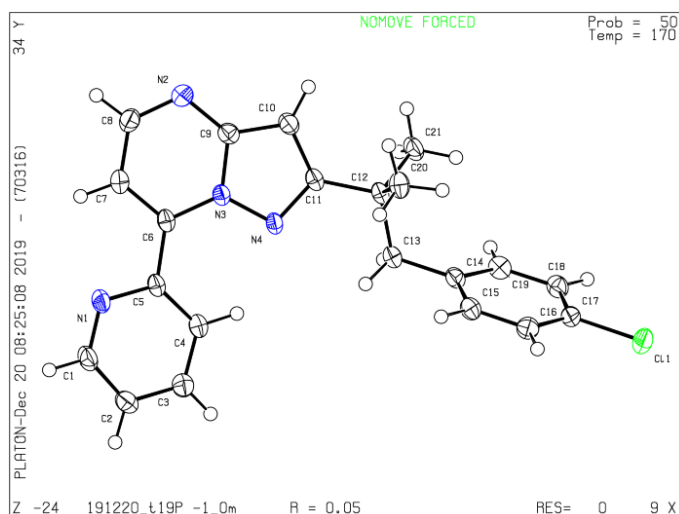

|                                                               |                |                |                    |
|---------------------------------------------------------------|----------------|----------------|--------------------|
| CCDC                                                          | 1987484        |                |                    |
| Bond precision:                                               | C-C = 0.0025 Å |                | Wavelength=0.71073 |
| Cell:                                                         | a=8.907(6)     | a=8.907(6)     | a=8.907(6)         |
|                                                               | alpha=68.74(4) | alpha=68.74(4) | alpha=68.74(4)     |
| Temperature:                                                  | 170 K          |                |                    |
|                                                               | Calculated     |                | Reported           |
| Volume                                                        | 864.0(13)      |                | 864.0(13)          |
| Space group                                                   | P -1           |                | P -1               |
| Hall group                                                    | -P 1           |                | -P 1               |
| Moiety formula                                                | C21 H19 Cl N4  |                | C21 H19 Cl N4      |
| Sum formula                                                   | C21 H19 Cl N4  |                | C21 H19 Cl N4      |
| Mr                                                            | 362.85         |                | 362.85             |
| Dx, g cm <sup>-3</sup>                                        | 1.395          |                | 1.395              |
| Z                                                             | 2              |                | 2                  |
| Mu (mm <sup>-1</sup> )                                        | 0.234          |                | 0.234              |
| F000                                                          | 380.0          |                | 380.0              |
| F000'                                                         | 380.41         |                |                    |
| h, k, lmax                                                    | 11, 13, 14     |                | 11, 13, 14         |
| Nref                                                          | 3815           |                | 3792               |
| Tmin, Tmax                                                    | 0.937, 0.954   |                | 0.562, 0.746       |
| Tmin'                                                         | 0.915          |                |                    |
| Correction method= # Reported T Limits: Tmin=0.562 Tmax=0.746 |                |                |                    |
| AbsCorr = MULTI-SCAN                                          |                |                |                    |

|                               |                                 |
|-------------------------------|---------------------------------|
| Data completeness= 0.994      | Theta(max)= 27.060              |
| R(reflections)= 0.0450( 3432) | wR2(reflections)= 0.1185( 3792) |
| S = 1.070                     | Npar= 237                       |

## 7.2 Crystal Structure of 4ca

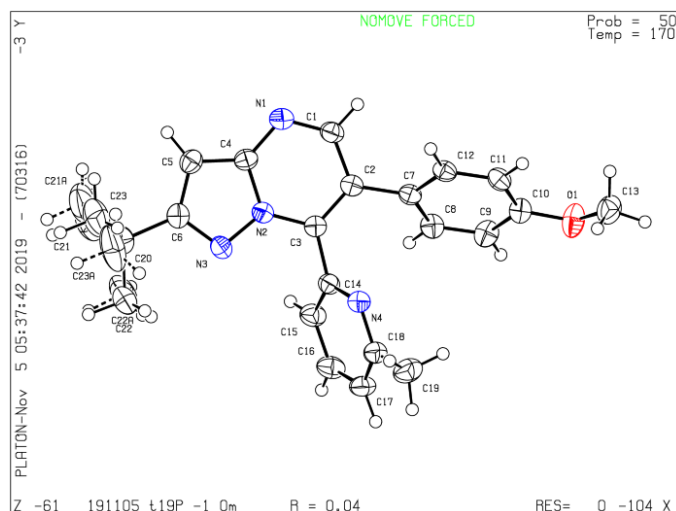

|                        |                                                |                                      |
|------------------------|------------------------------------------------|--------------------------------------|
| CCDC                   | 1987483                                        |                                      |
| Bond precision:        | C-C = 0.0016 Å                                 | Wavelength=0.71073                   |
| Cell:                  | a=9.4235(3)      b=9.4517(3)      c=11.8728(4) | gamma=79.093(1)                      |
| Temperature:           | 170 K                                          |                                      |
|                        | Calculated                                     | Reported                             |
| Volume                 | 1020.62(6)                                     | 1020.62(6)                           |
| Space group            | P -1                                           | P -1                                 |
| Hall group             | -P 1                                           | -P 1                                 |
| Moiety formula         | C23 H24 N4 O                                   | C23 H24 N4 O                         |
| Sum formula            | C23 H24 N4 O                                   | C23 H24 N4 O                         |
| Mr                     | 372.46                                         | 372.46                               |
| Dx, g cm <sup>-3</sup> | 1.212                                          | 1.212                                |
| Z                      | 2                                              | 2                                    |
| Mu (mm <sup>-1</sup> ) | 0.076                                          | 0.076                                |
| F000                   | 396.0                                          | 396.0                                |
| F000'                  | 396.14                                         |                                      |
| h, k, lmax             | 12,12,15                                       | 12,12,15                             |
| Nref                   | 4509                                           | 4492                                 |
| Tmin, Tmax             | 0.986,0.992                                    | 0.688,0.746                          |
| Tmin'                  | 0.985                                          |                                      |
| Correction method=     | # Reported                                     | T Limits: Tmin=0.688      Tmax=0.746 |
| AbsCorr =              | MULTI-SCAN                                     |                                      |

|                               |                                 |
|-------------------------------|---------------------------------|
| Data completeness= 0.996      | Theta(max)= 27.117              |
| R(reflections)= 0.0407( 4042) | wR2(reflections)= 0.1103( 4492) |
| S = 1.029                     | Npar= 289                       |

### 7.3 Crystal Structure of 8

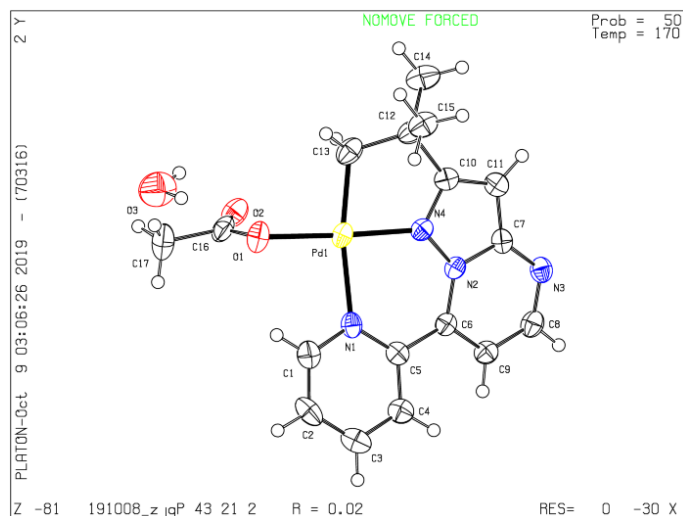

|                                 |                                    |                        |
|---------------------------------|------------------------------------|------------------------|
| CCDC                            | 1987481                            |                        |
| Bond precision:                 | C-C = 0.0056 Å                     | Wavelength=0.71073     |
| Cell:                           | a=15.890(8)      a=15.890(8)       | a=15.890(8)            |
|                                 | alpha=90      alpha=90             | alpha=90               |
| Temperature:                    | 170 K                              |                        |
|                                 | Calculated                         | Reported               |
| Volume                          | 3565(4)                            | 3565(4)                |
| Space group                     | P 43 21 2                          | P 43 21 2              |
| Hall group                      | P 4nw 2abw                         | P 4nw 2abw             |
| Moiety formula                  | C17 H18 N4 O2<br>Pd, H2 O          | C17 H18 N4 O2 Pd, H2 O |
| Sum formula                     | C17 H20 N4 O3<br>Pd                | C17 H20 N4 O3 Pd       |
| Mr                              | 434.77                             | 434.77                 |
| Dx, g cm <sup>-3</sup>          | 1.620                              | 1.620                  |
| Z                               | 8                                  | 8                      |
| Mu (mm <sup>-1</sup> )          | 1.065                              | 1.064                  |
| F000                            | 1760.0                             | 1760.0                 |
| F000'                           | 1752.63                            |                        |
| h, k, lmax                      | 20,20,18                           | 20,20,18               |
| Nref                            | 3901[ 2266]                        | 3866                   |
| Tmin, Tmax                      | 0.815, 0.880                       | 0.666, 0.746           |
| Tmin'                           | 0.727                              |                        |
| Correction method= # Reported T | Limits: Tmin=0.666      Tmax=0.746 |                        |
| AbsCorr = MULTI-SCAN            |                                    |                        |

Data completeness= 1.71/0.99  
R(reflections)= 0.0225( 3658)  
S = 1.083

Theta(max)= 27.007  
wR2(reflections)= 0.0510( 3866)  
Npar= 235

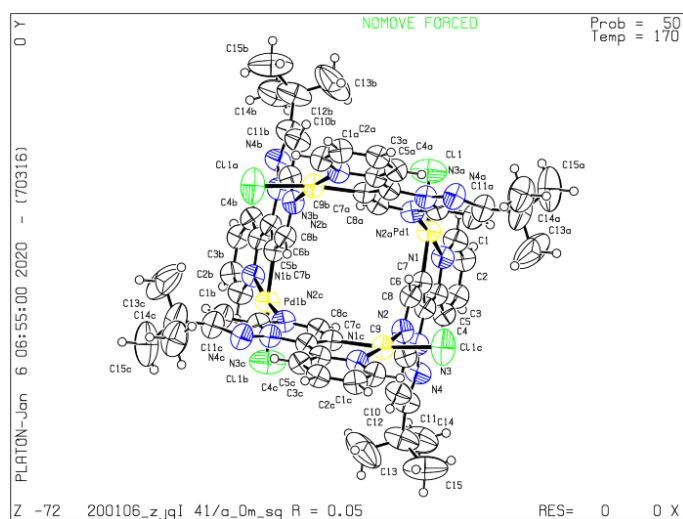

|                                 |                 |              |  |                     |
|---------------------------------|-----------------|--------------|--|---------------------|
| CCDC                            | 1987482         |              |  |                     |
| Bond precision:                 | C-C = 0.0073 Å  |              |  | Wavelength=0.71073  |
| Cell:                           | a=20.0376(7)    | a=20.0376(7) |  | a=20.0376(7)        |
|                                 | alpha=90        | alpha=90     |  | alpha=90            |
| Temperature:                    | 170 K           |              |  |                     |
|                                 | Calculated      |              |  | Reported            |
| Volume                          | 9582.6(7)       |              |  | 3565(4)             |
| Space group                     | I 41/a          |              |  | P 43 21 2           |
| Hall group                      | -I 4ad          |              |  | P 4nw 2abw          |
| Moiety formula                  | C60 H60 Cl4 N16 |              |  | C60 H60 Cl4 N16 Pd4 |
|                                 | Pd4 [+solvent]  |              |  |                     |
| Sum formula                     | C60 H60 Cl4 N16 |              |  | C60 H60 Cl4 N16 Pd4 |
|                                 | Pd4 [+solvent]  |              |  |                     |
| Mr                              | 1572.64         |              |  | 1572.64             |
| Dx, g cm <sup>-3</sup>          | 1.090           |              |  | 1.090               |
| Z                               | 4               |              |  | 4                   |
| Mu (mm <sup>-1</sup> )          | 0.885           |              |  | 0.885               |
| F000                            | 3136.0          |              |  | 3136.0              |
| F000'                           | 3123.11         |              |  |                     |
| h, k, lmax                      | 25,25,30        |              |  | 25,25,30            |
| Nref                            | 5296            |              |  | 5296                |
| Tmin, Tmax                      | 0.783,0.838     |              |  | 0.650,0.746         |
| Tmin'                           | 0.708           |              |  |                     |
| Correction method= # Reported T | Limits:         | Tmin=0.650   |  | Tmax=0.746          |
| AbsCorr = MULTI-SCAN            |                 |              |  |                     |

|                               |                                 |
|-------------------------------|---------------------------------|
| Data completeness= 1.000      | Theta(max)= 27.108              |
| R(reflections)= 0.0463( 3910) | wR2(reflections)= 0.1468( 5296) |
| S = 1.068                     | Npar= 193                       |

## 8. References

1. J. C. Castillo, H. A. Rosero, J. Portilla. *RSC Adv.* **2017**, 7, 28483.
2. T. Gogula, J. Q. Zhang, H. B. Zou, H. B. *Org. Lett.* **2019**, 21, 5933.
3. H. Park, P. Verma, K. Hong, J. Q. Yu, *Nat. Chem.* **2018**, 10, 755.

## 9. NMR spectra

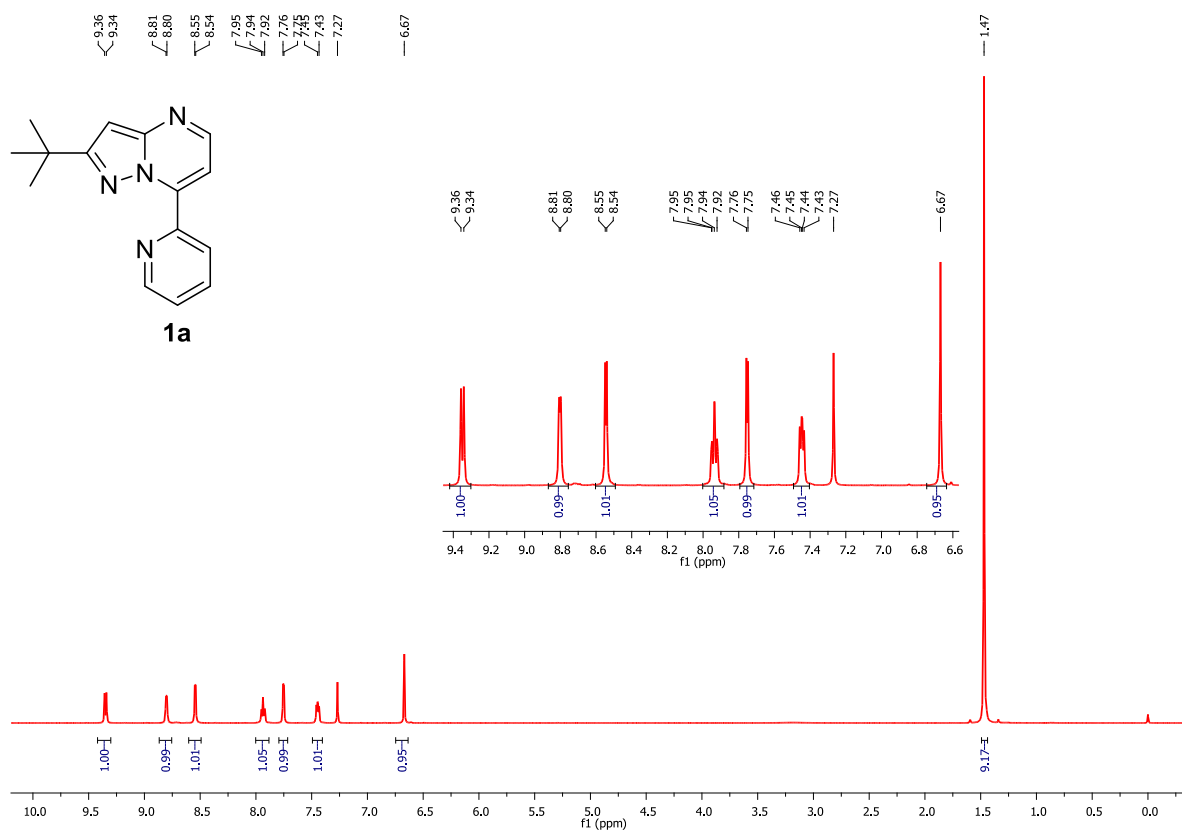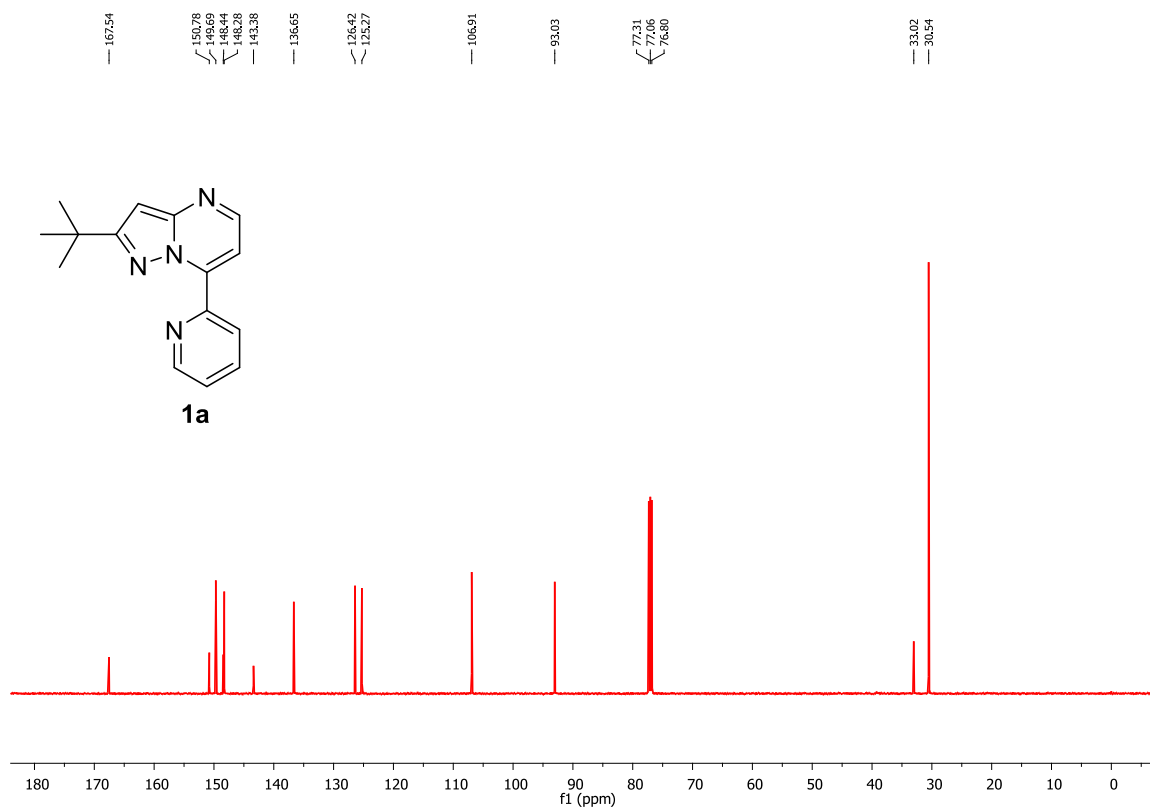



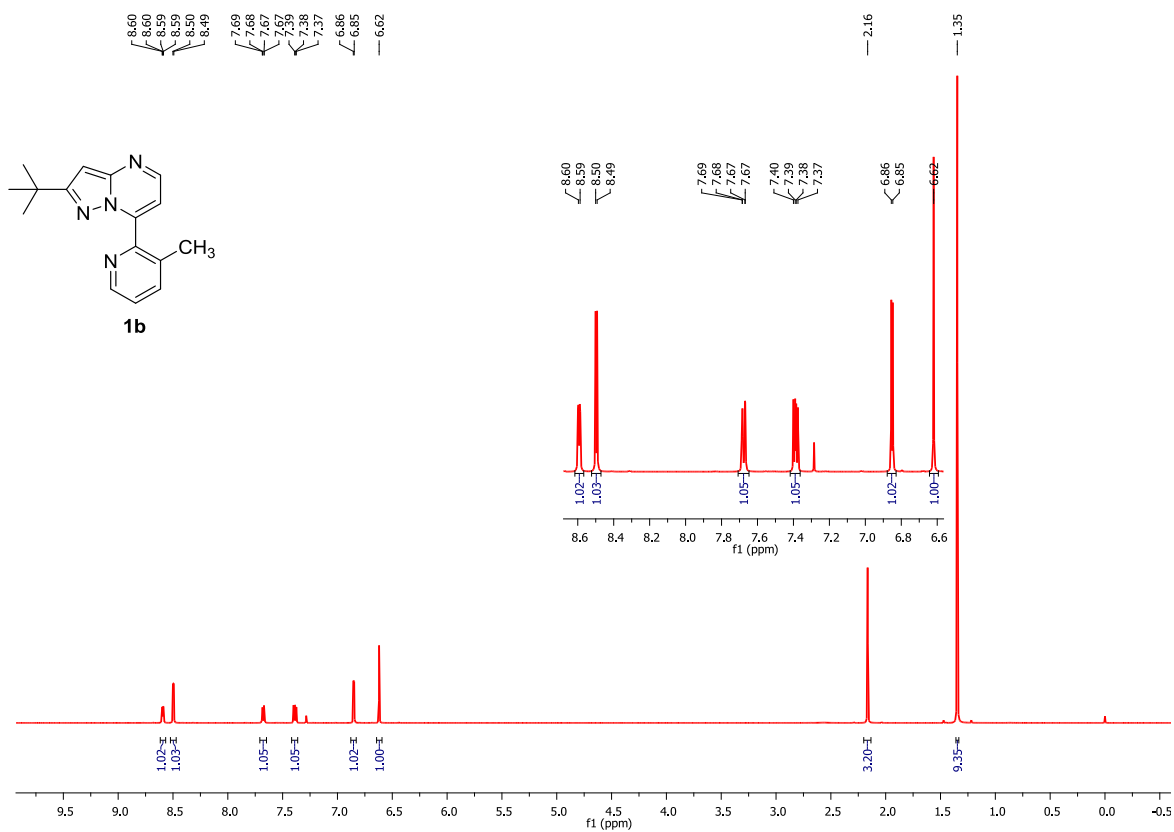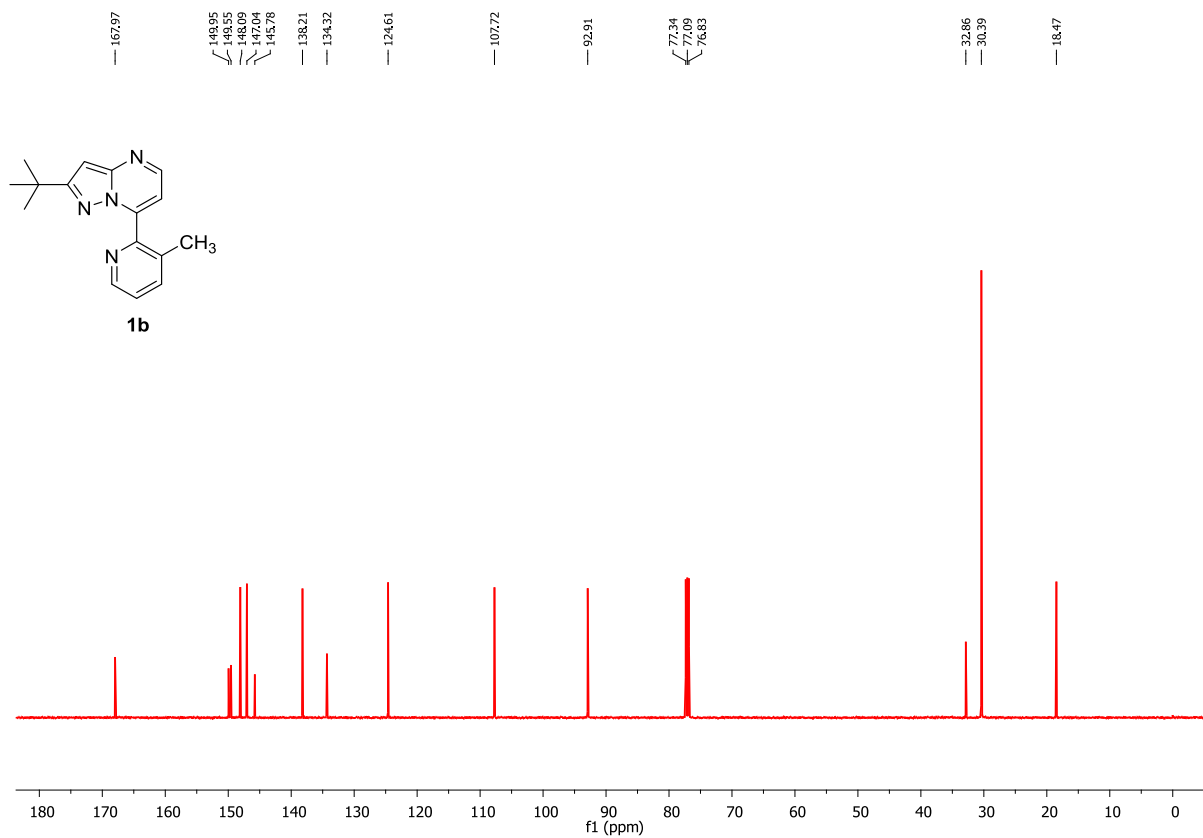

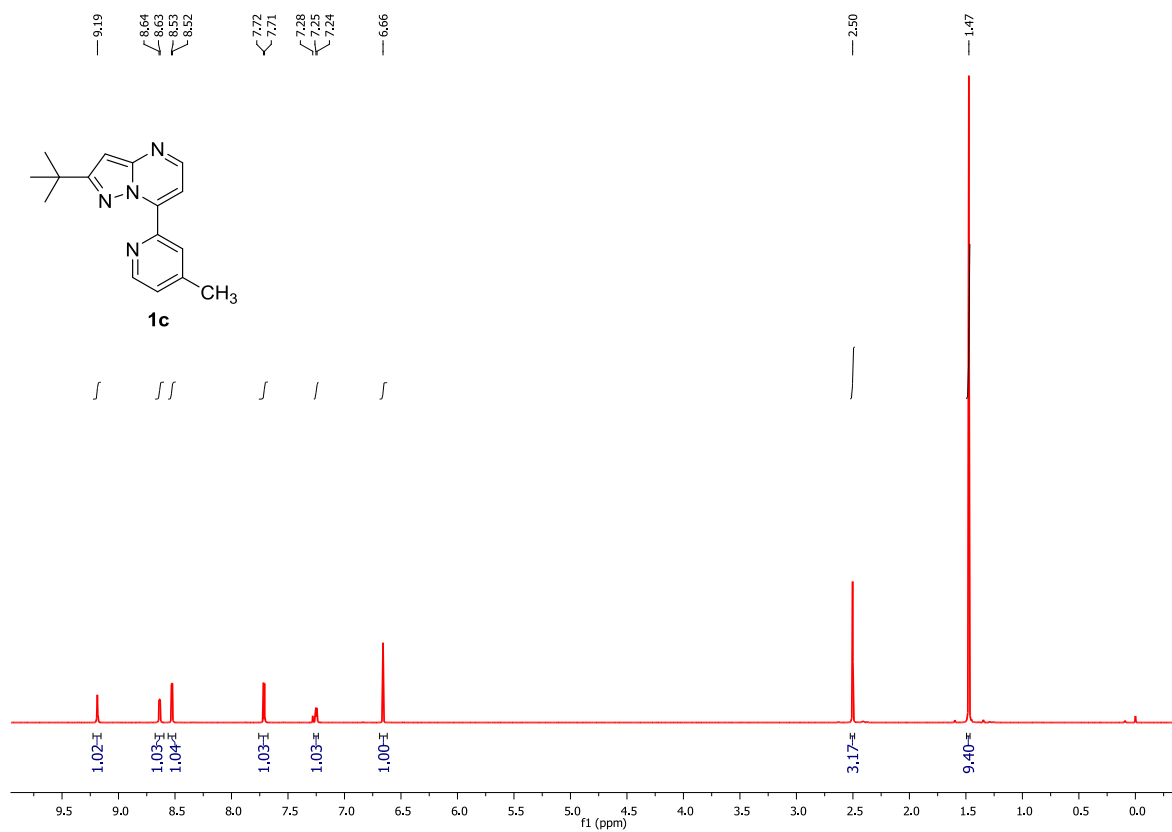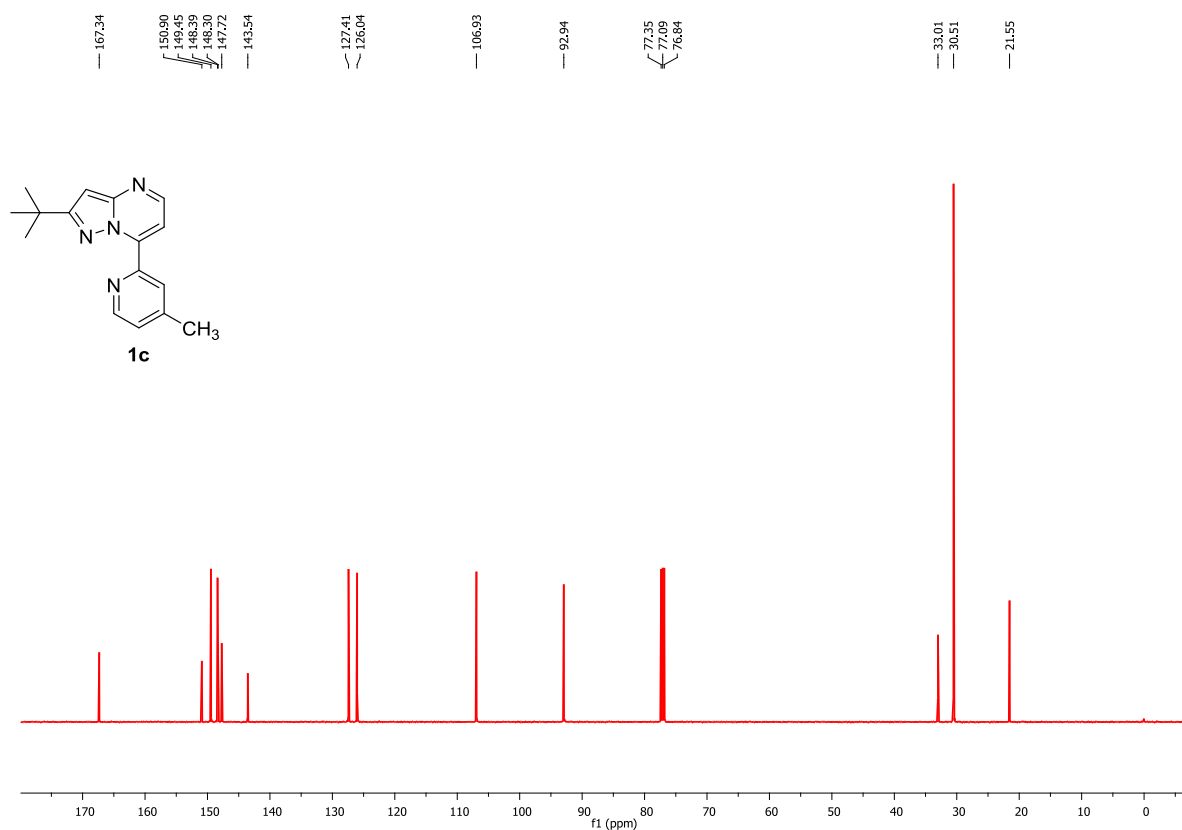

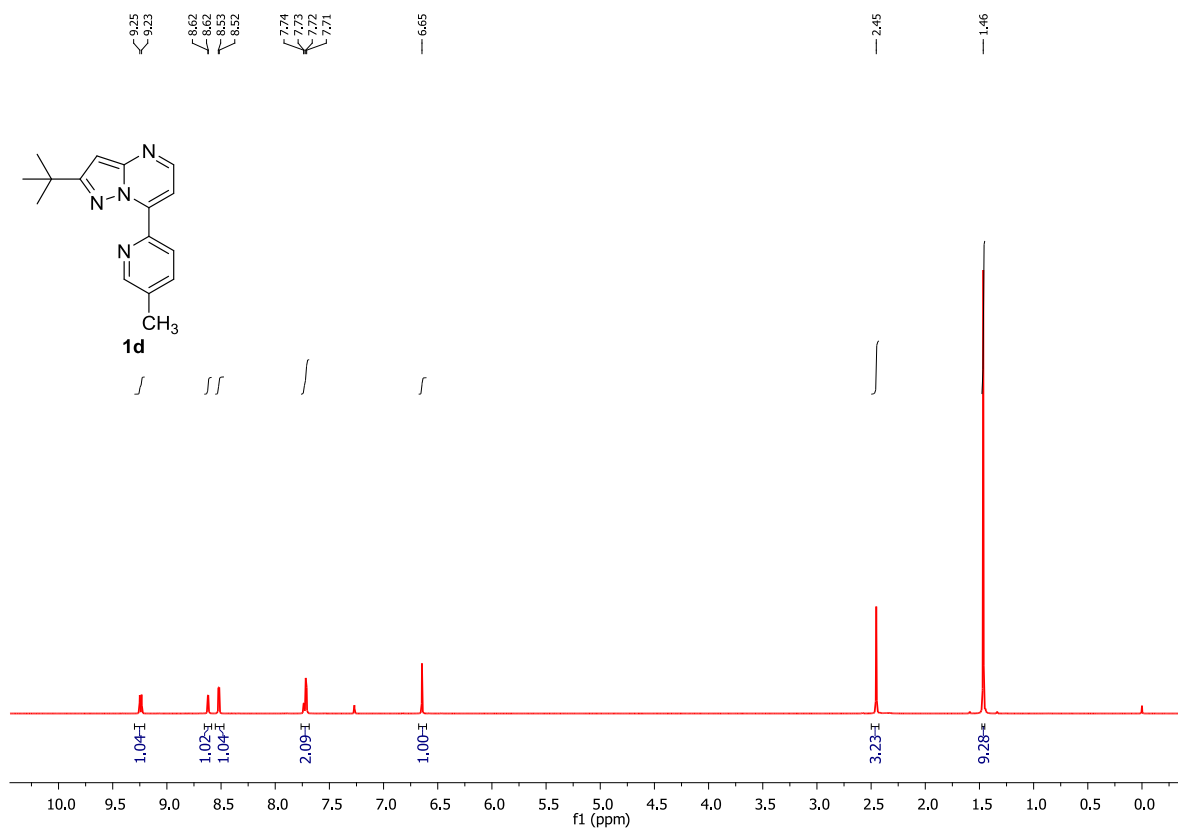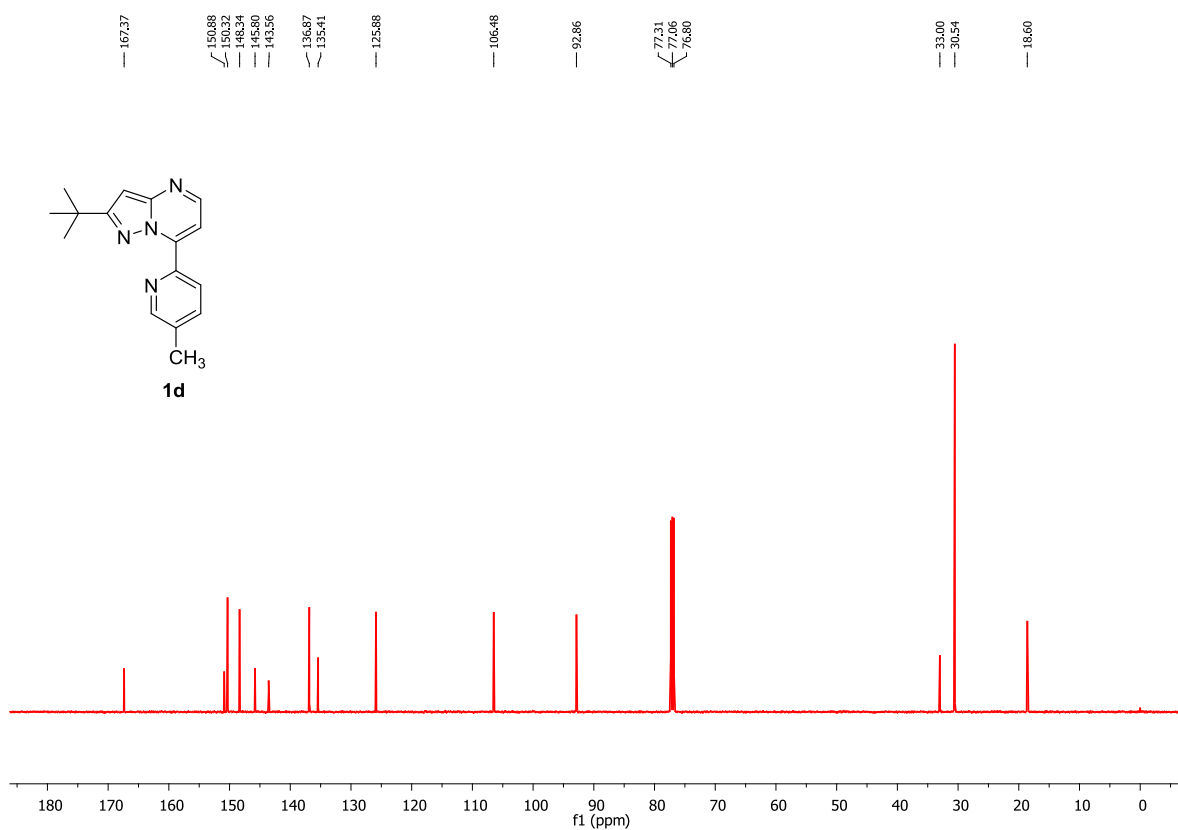

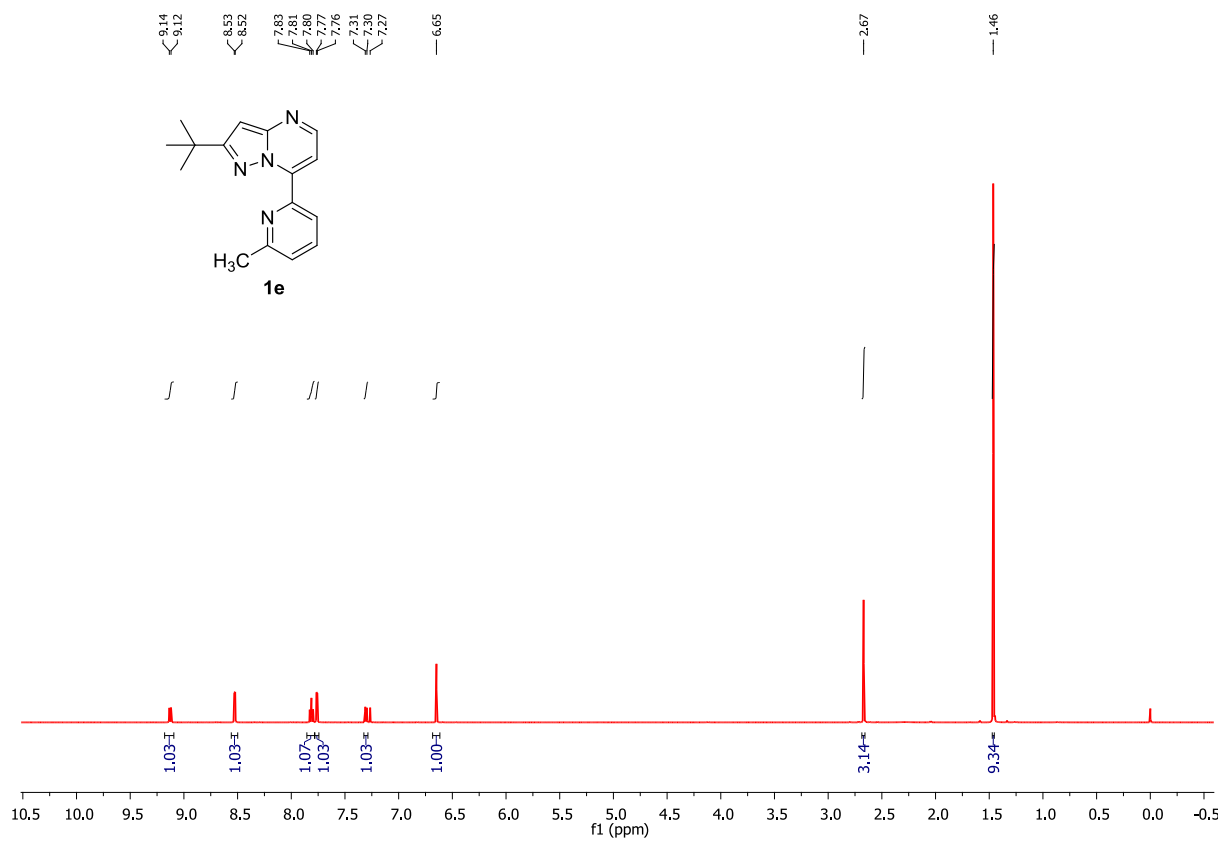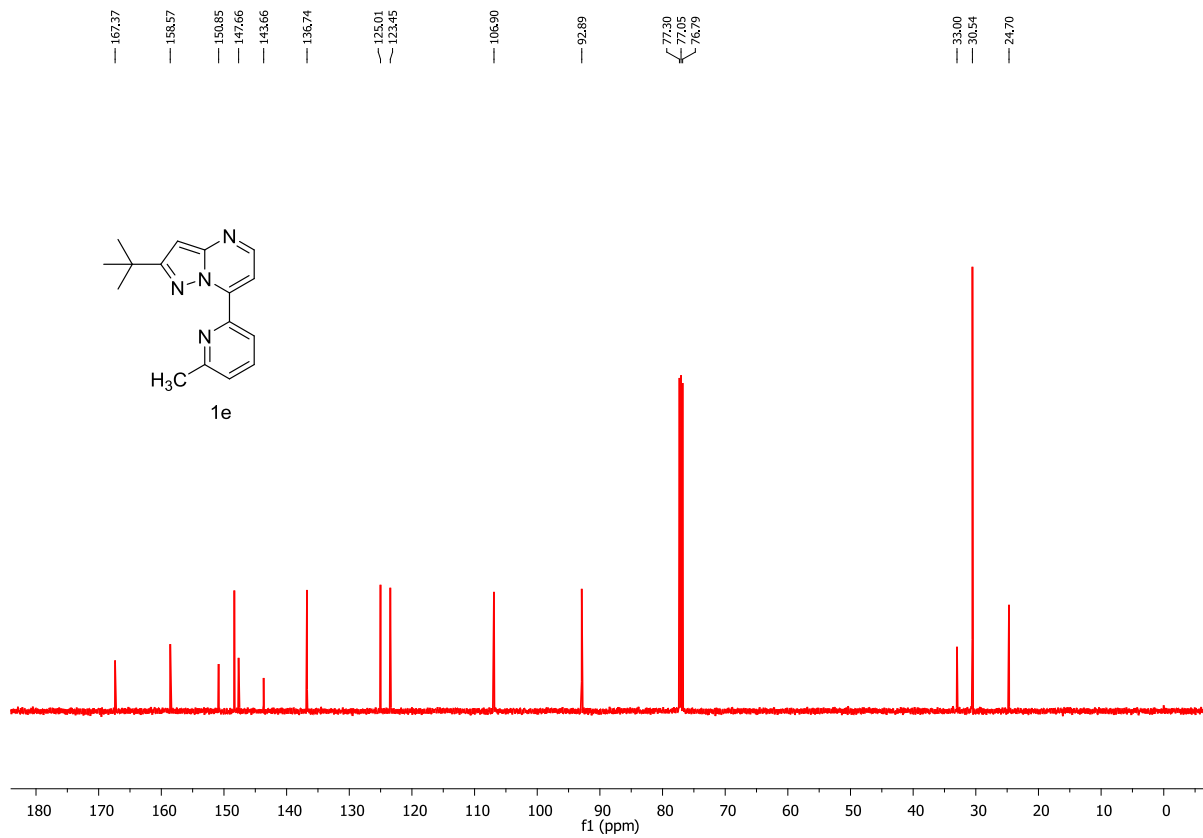

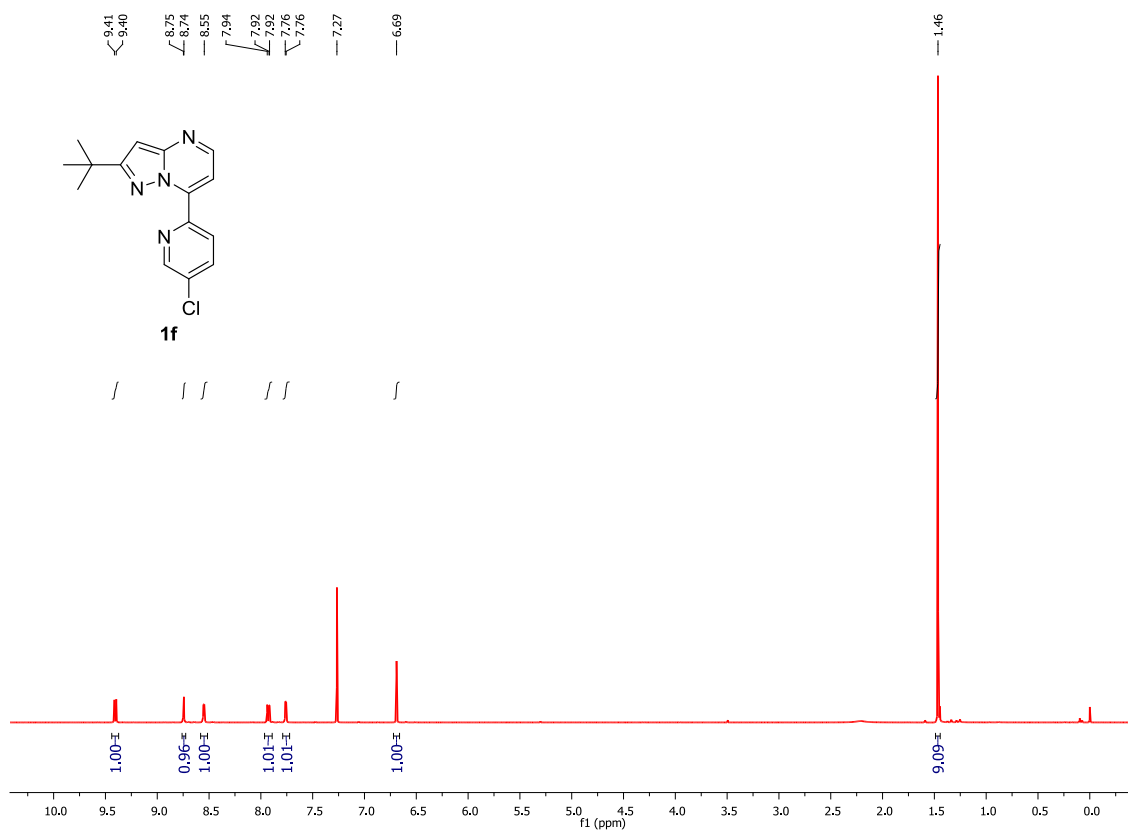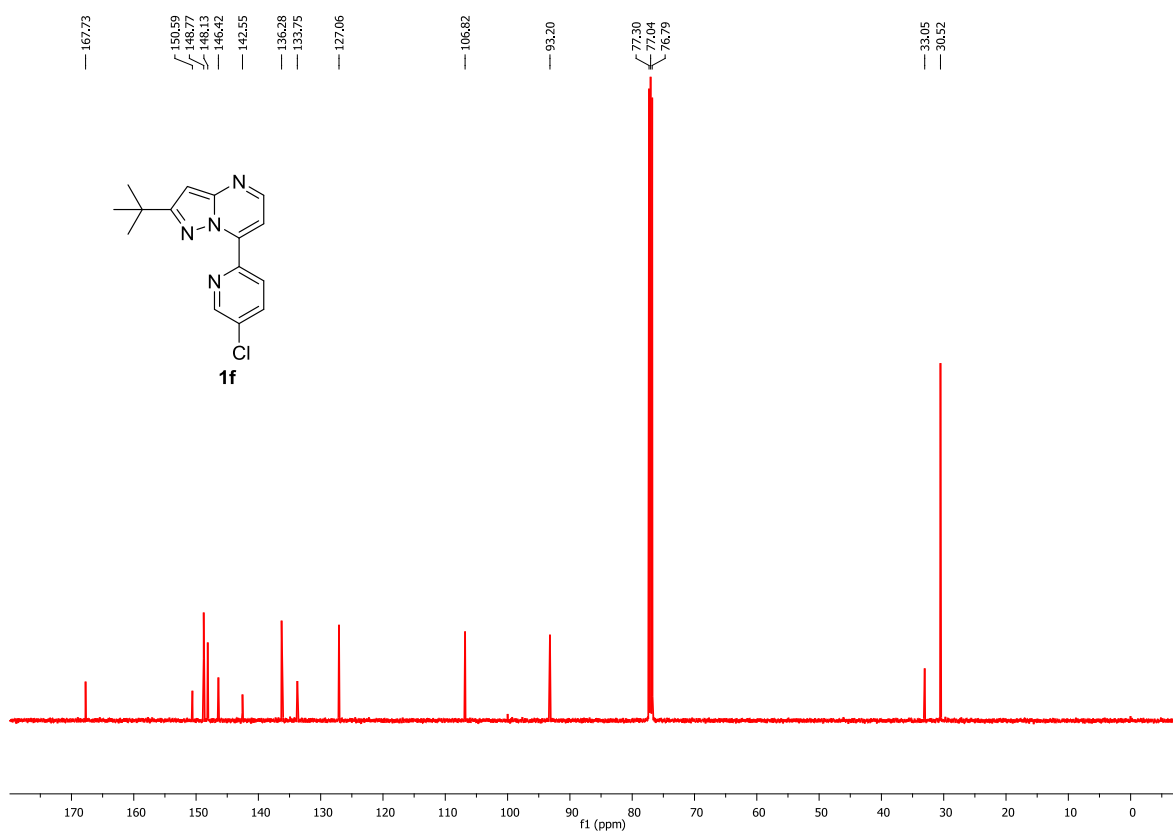

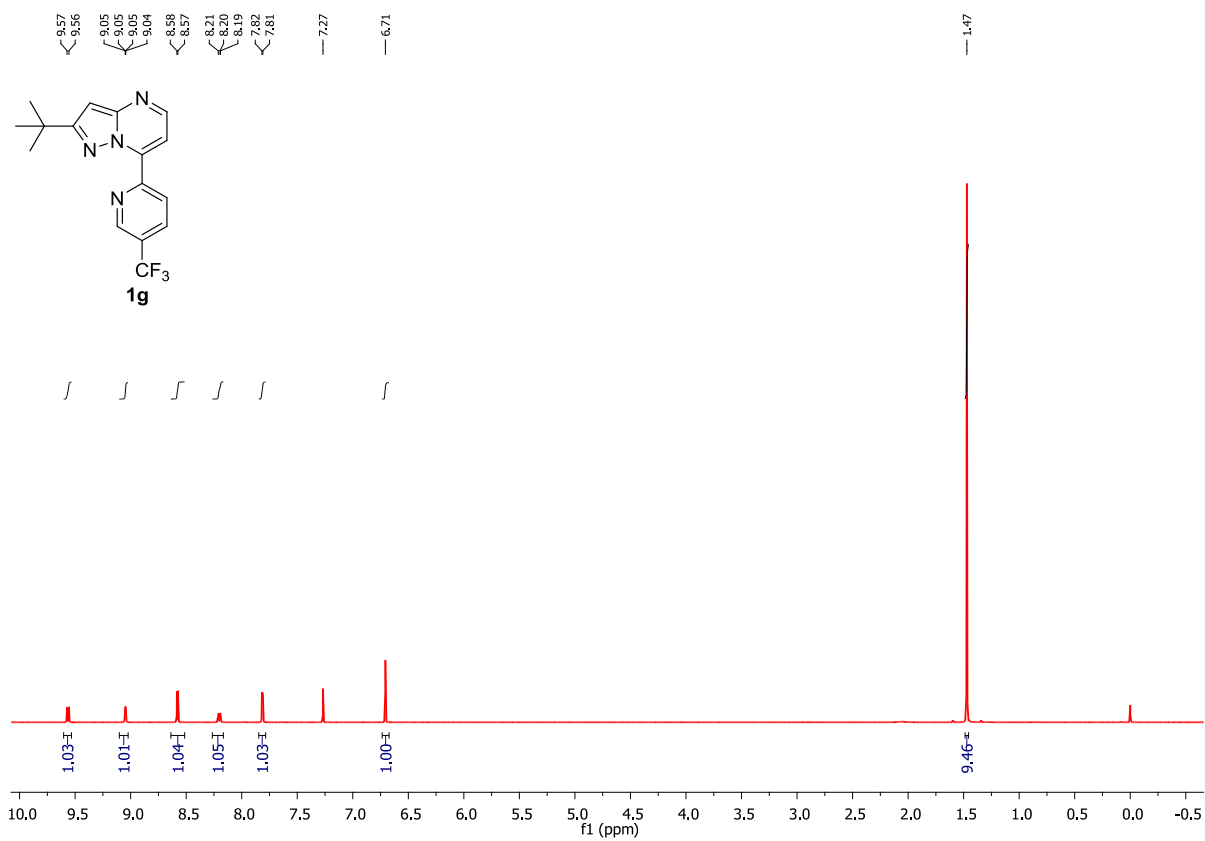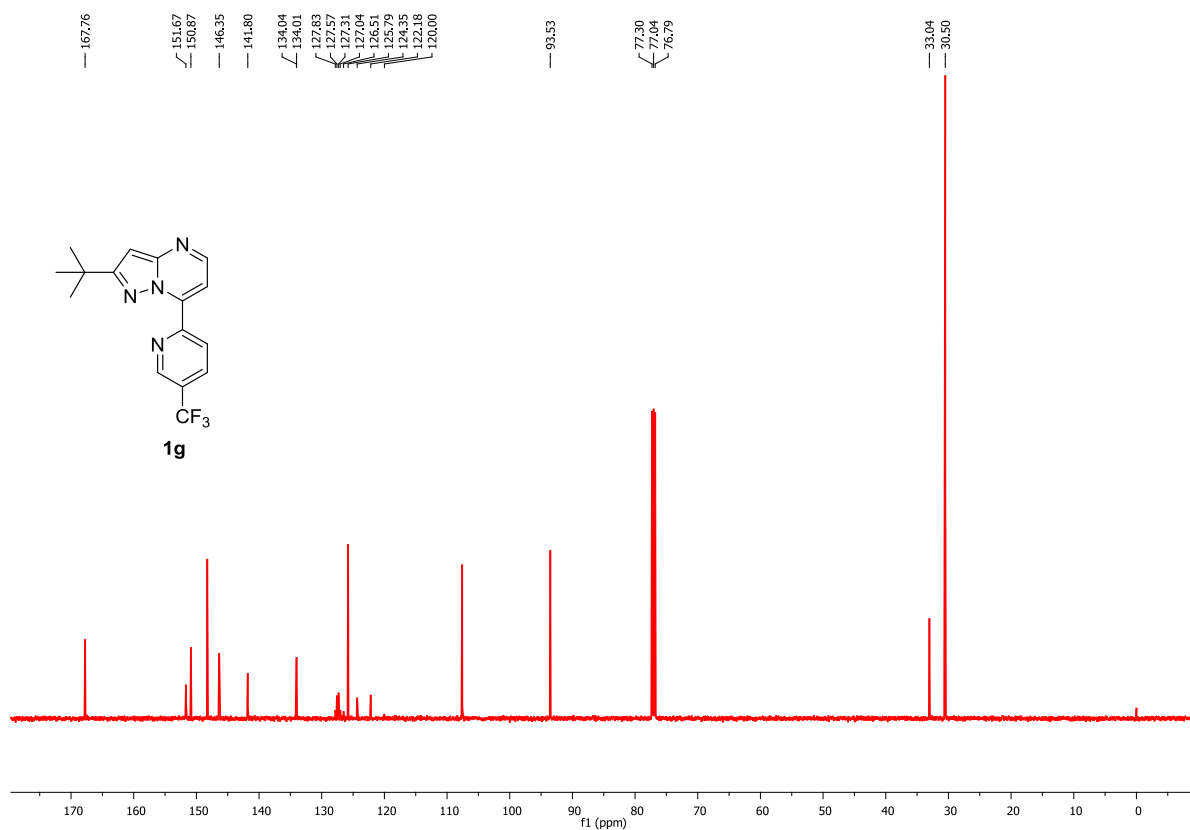

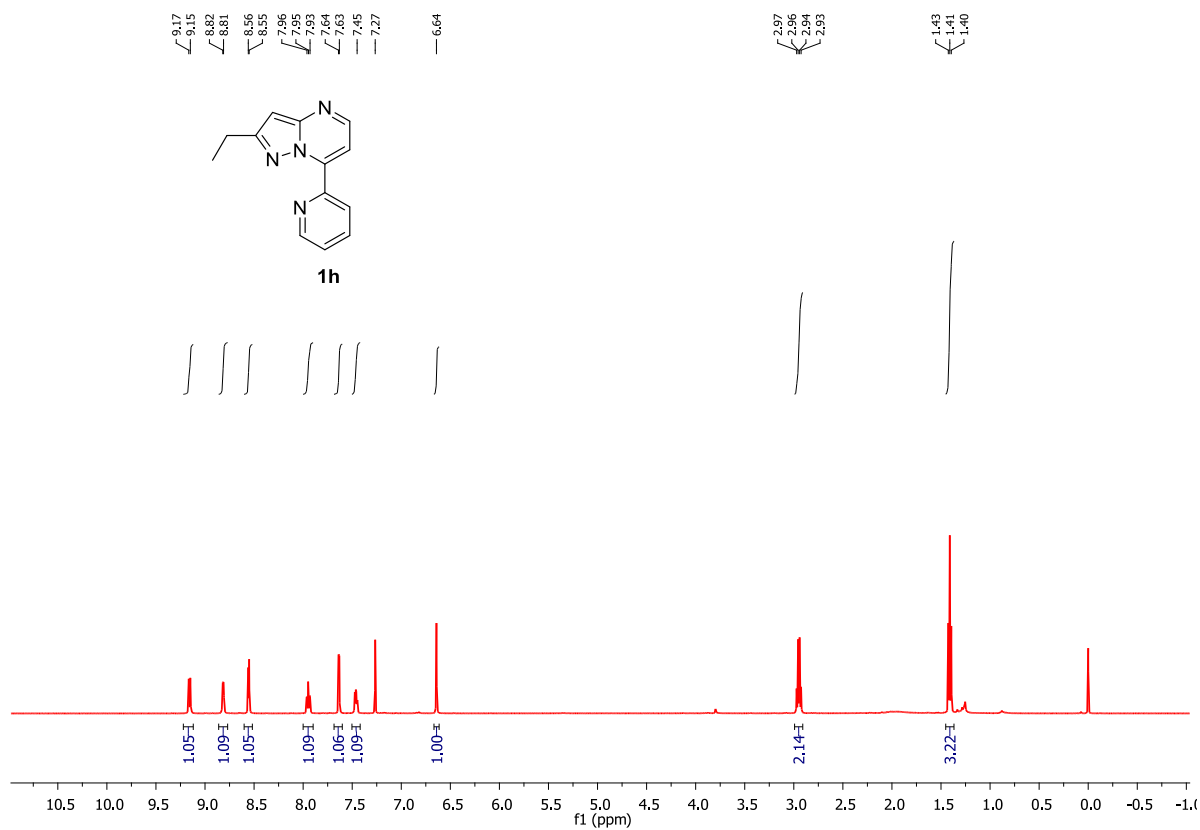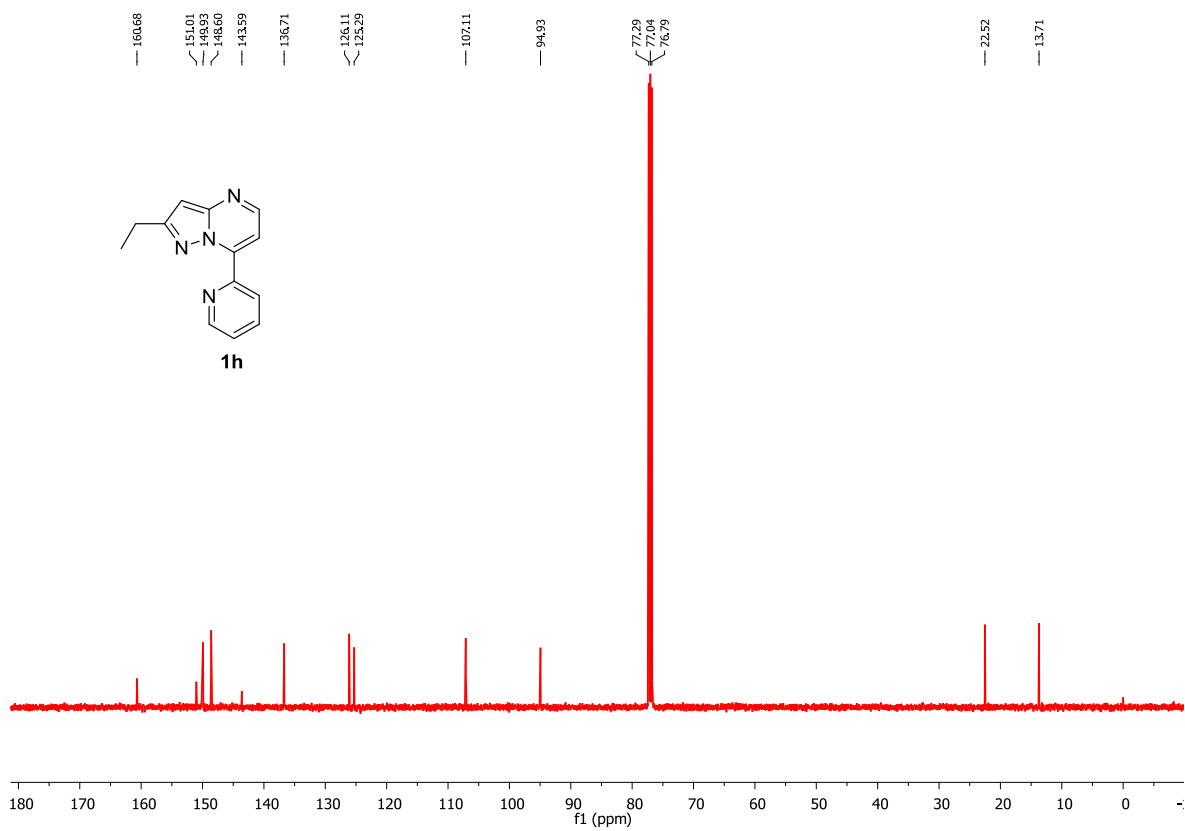

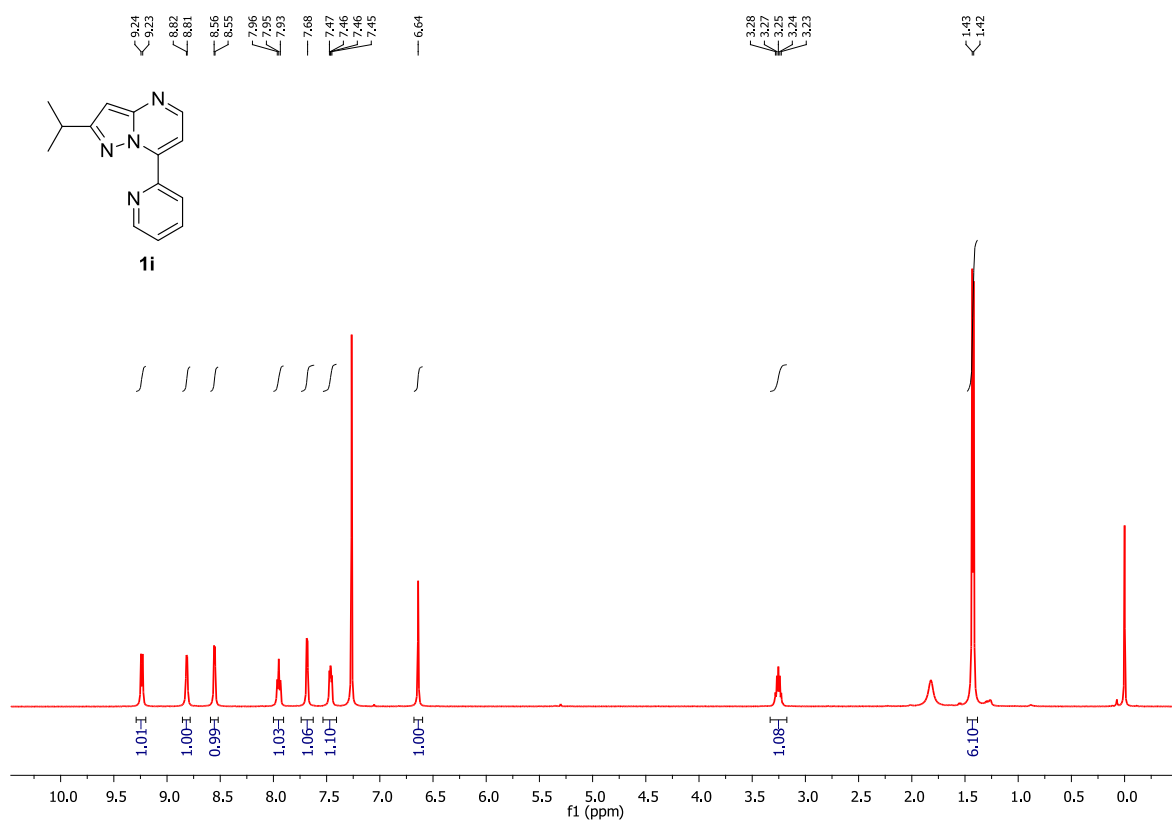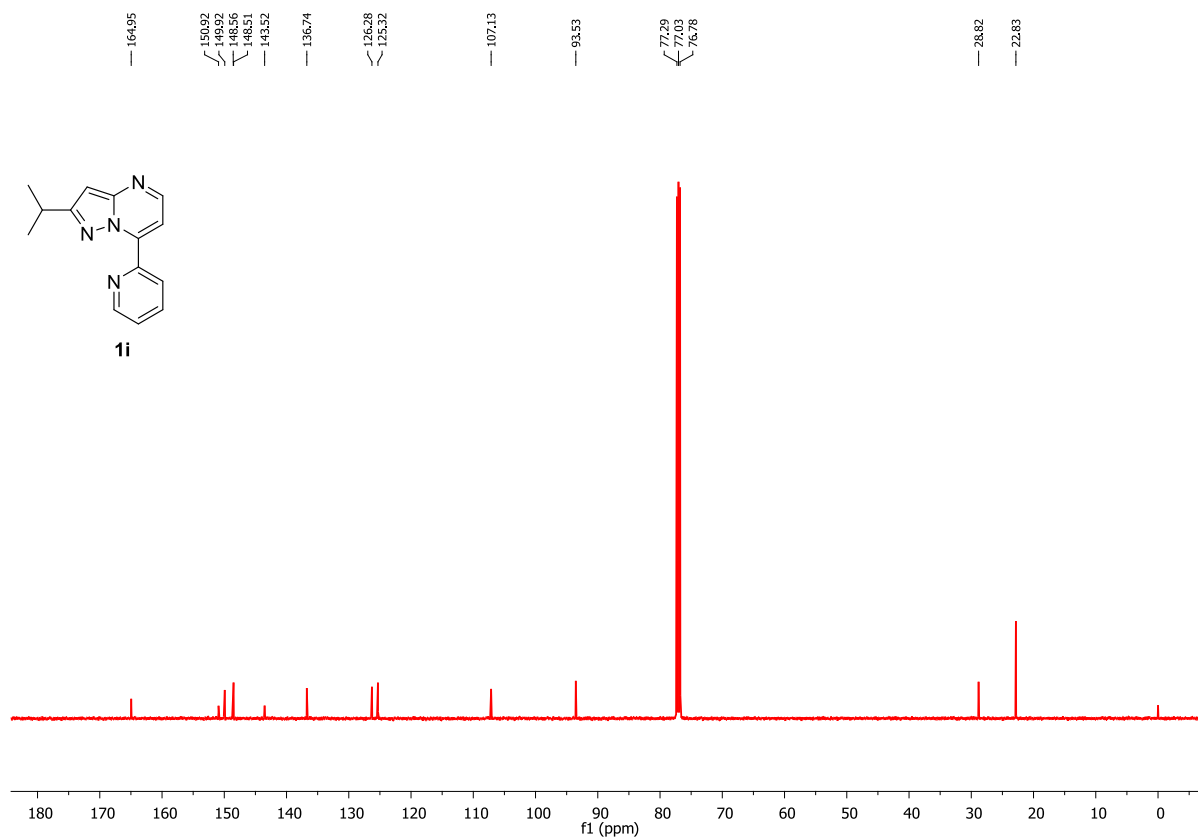



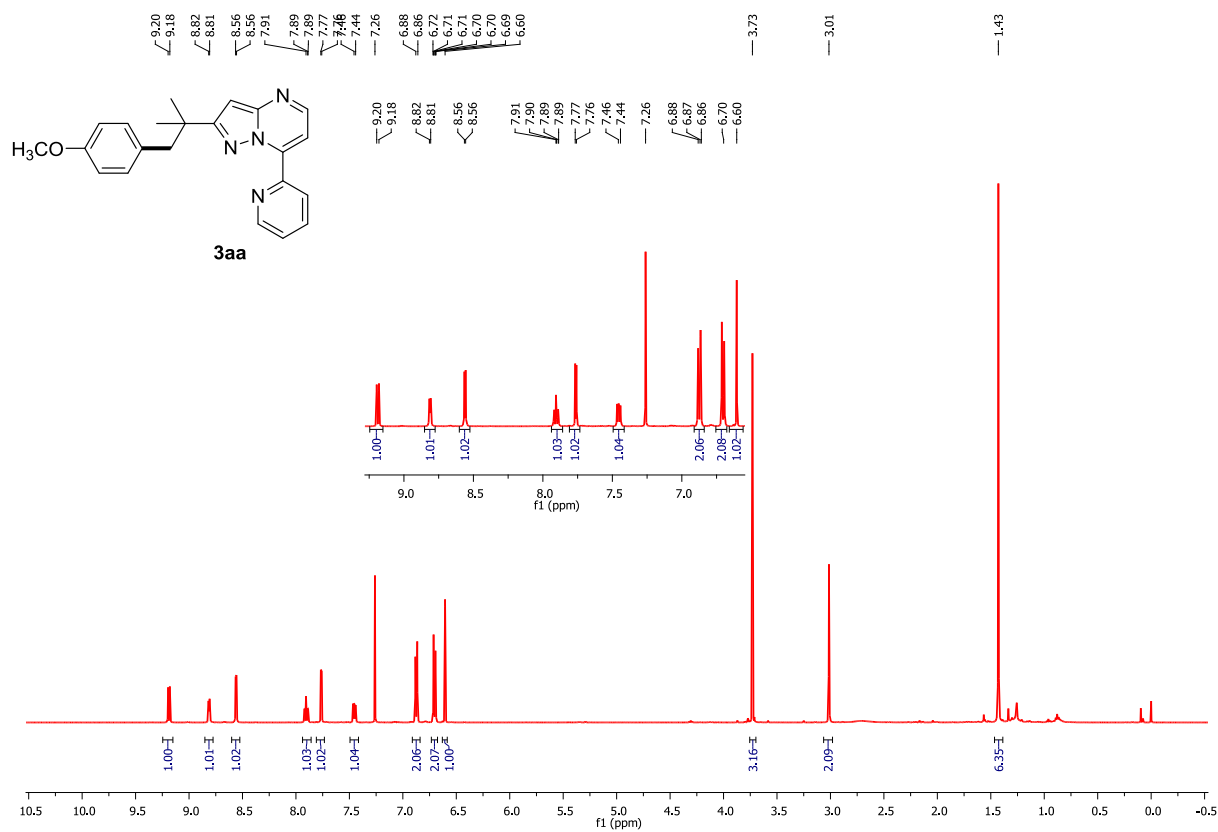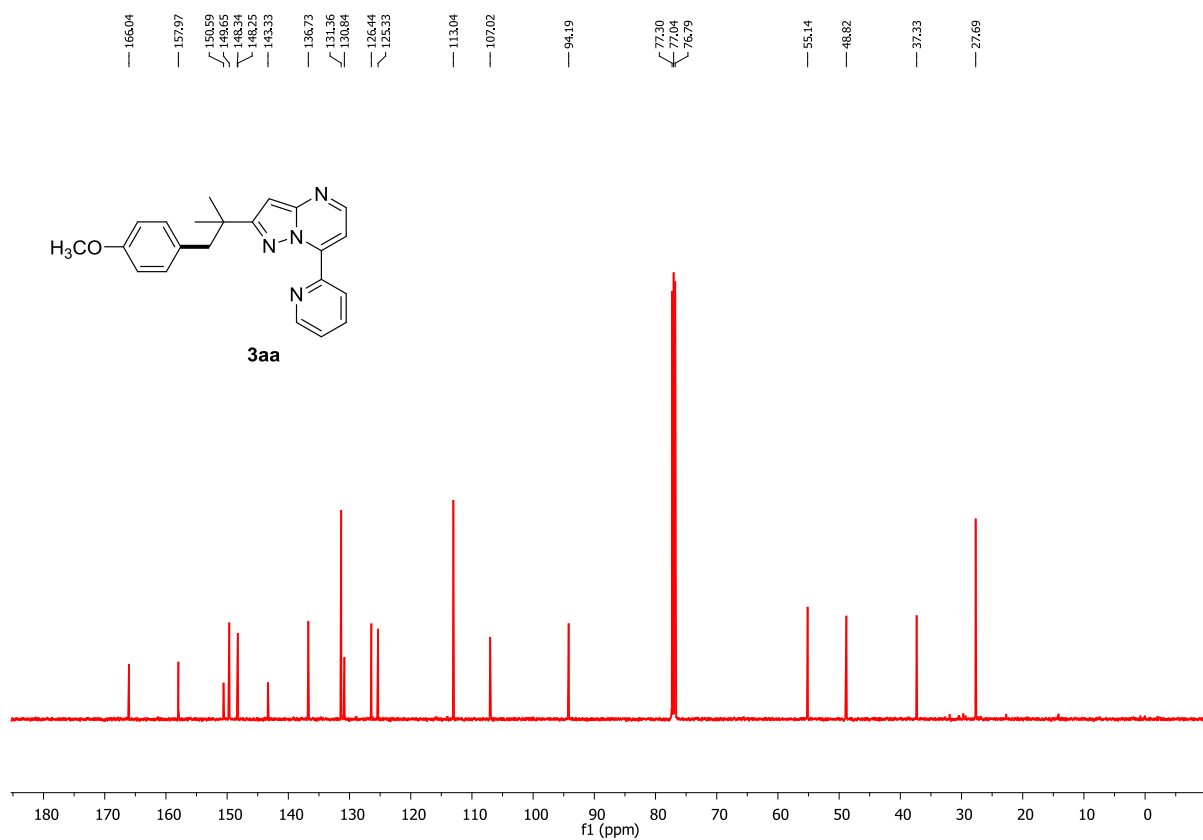

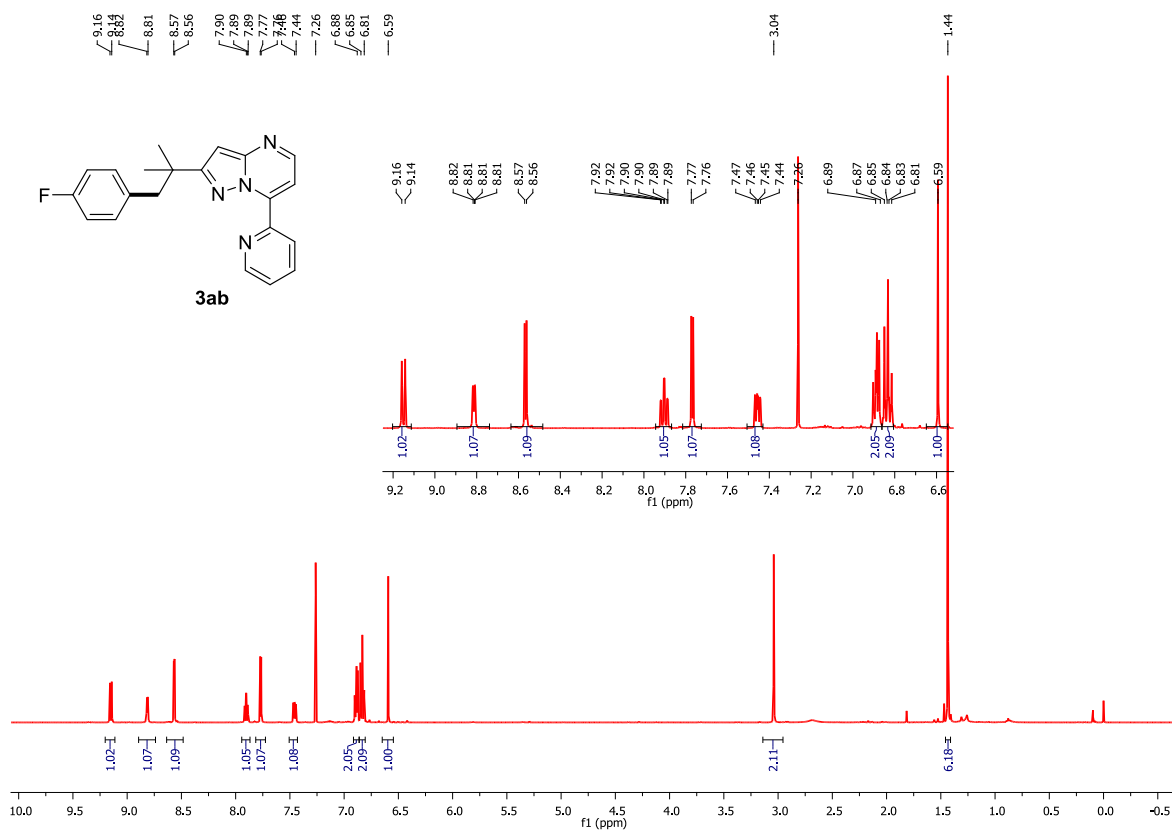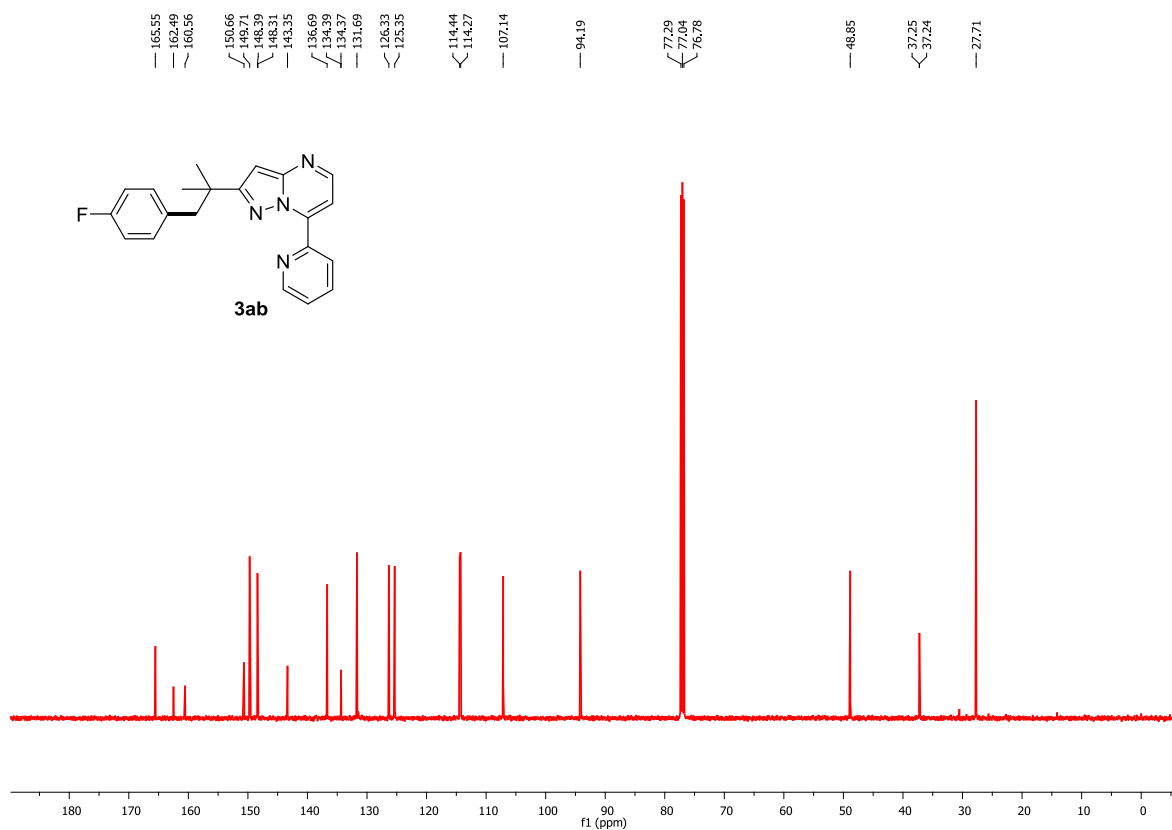

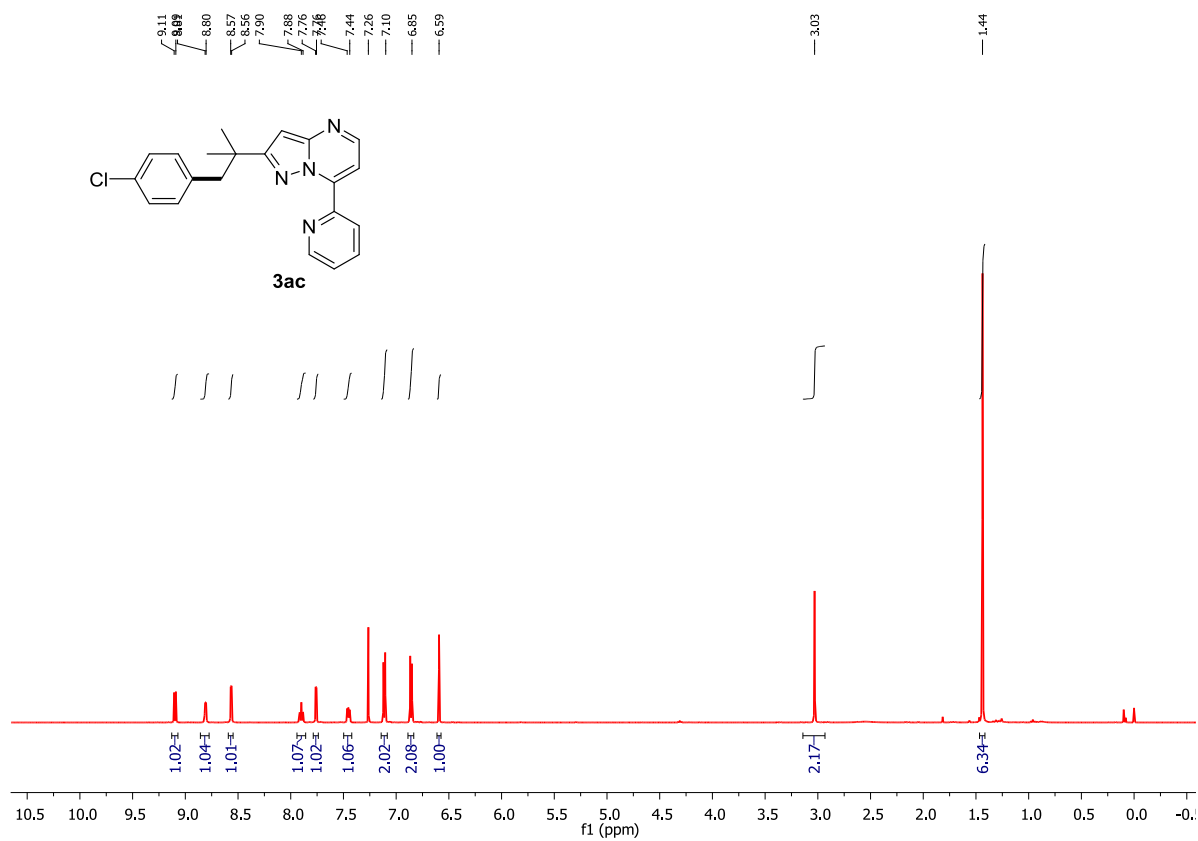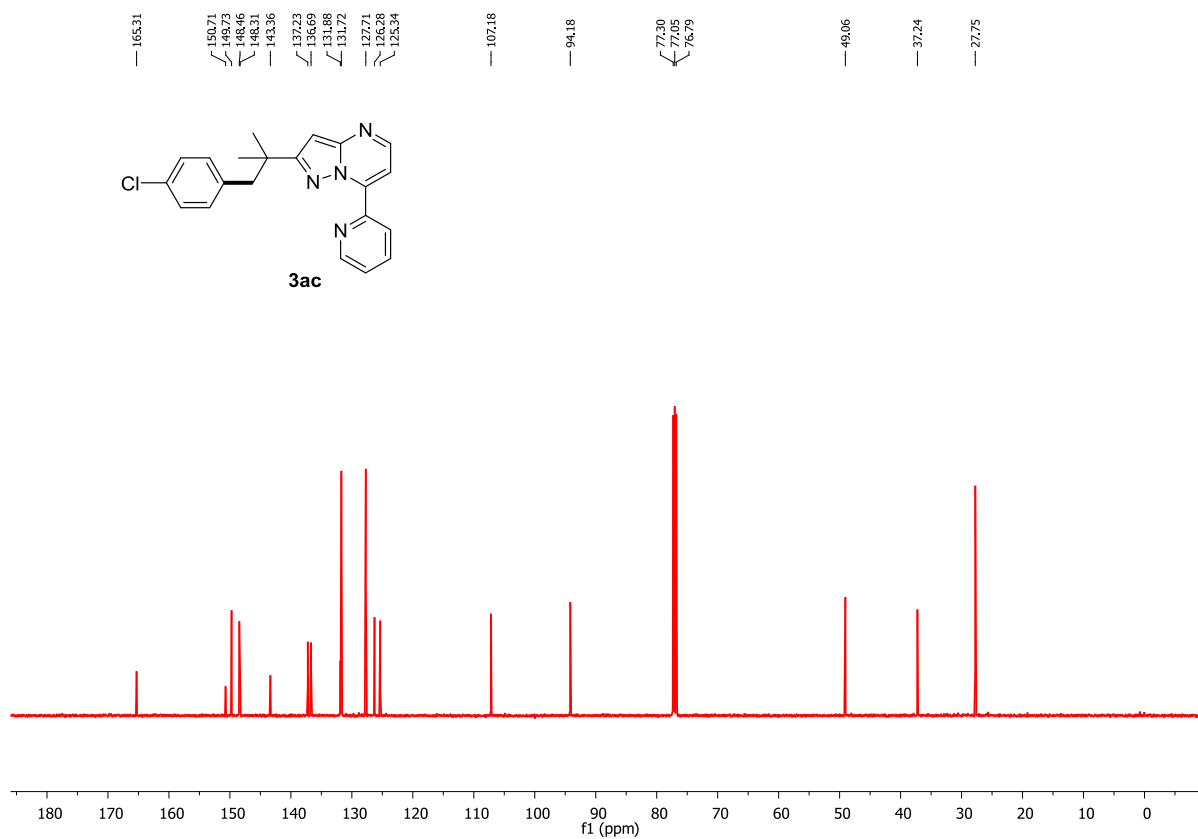

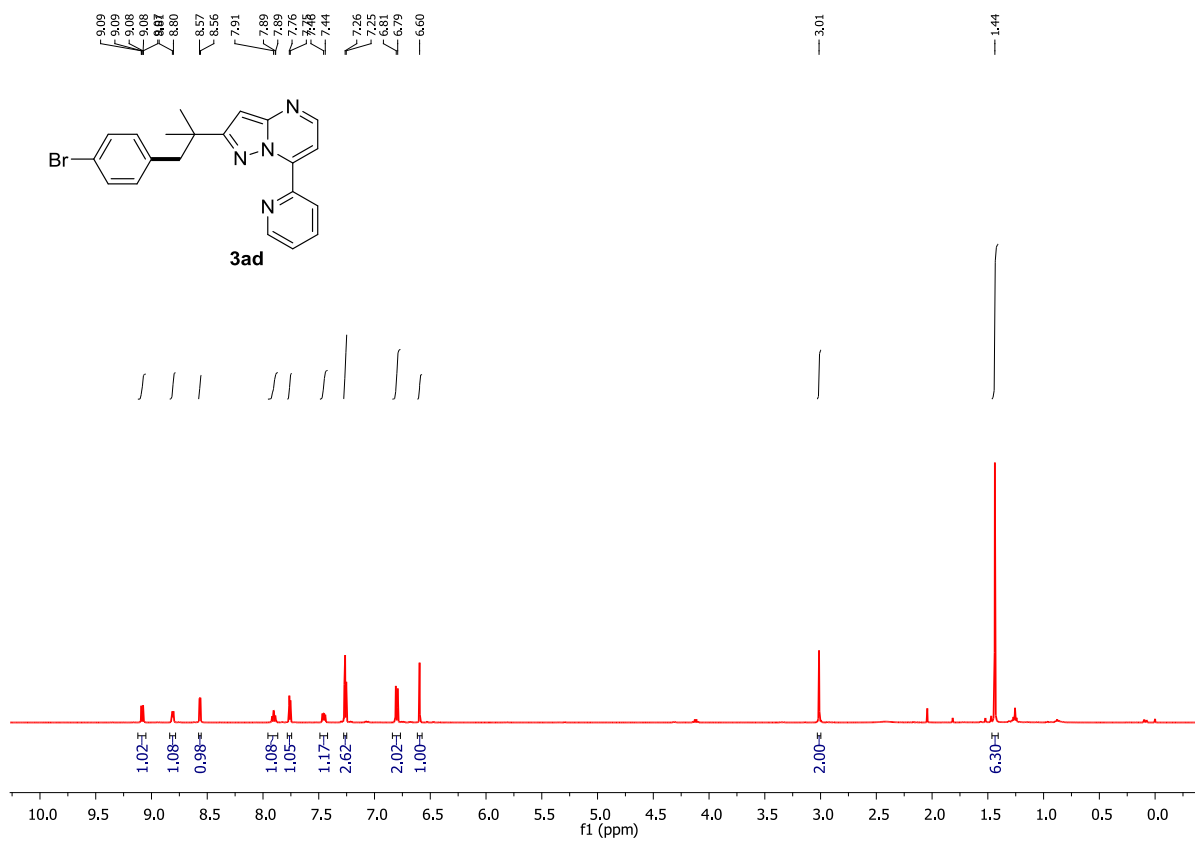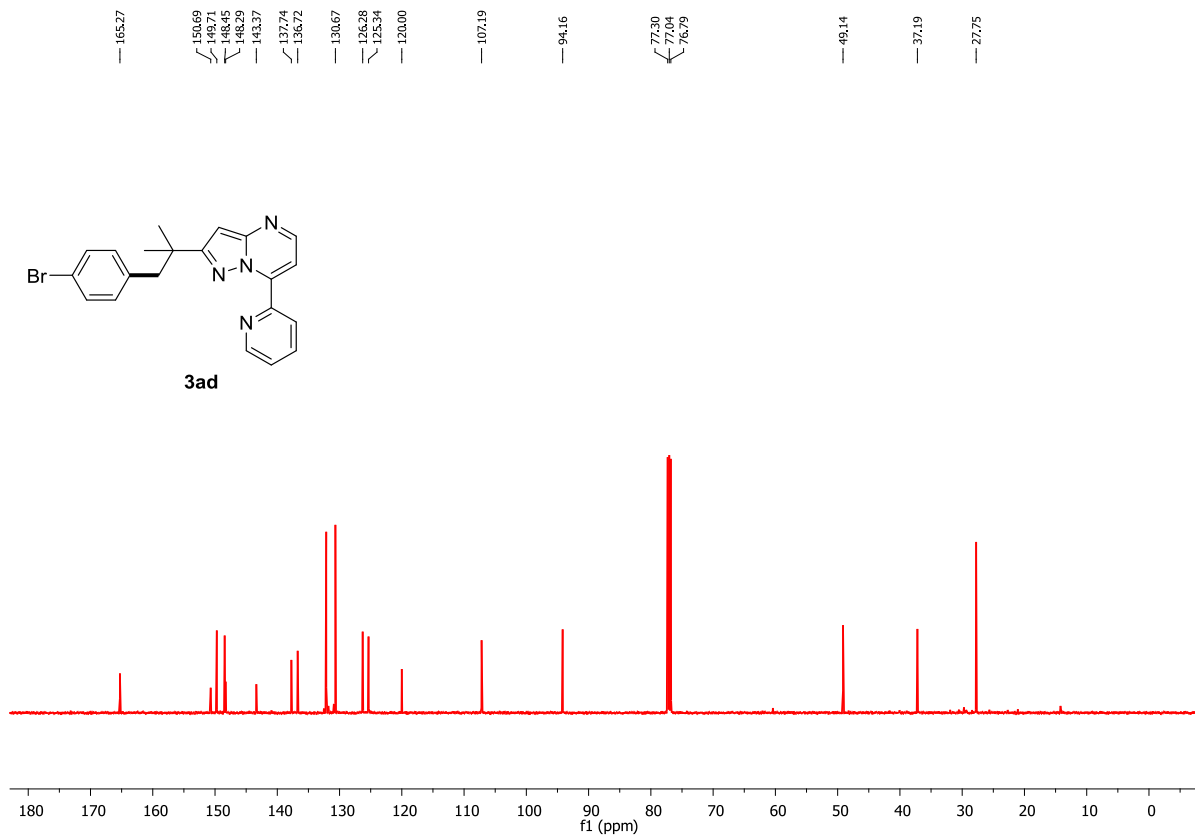

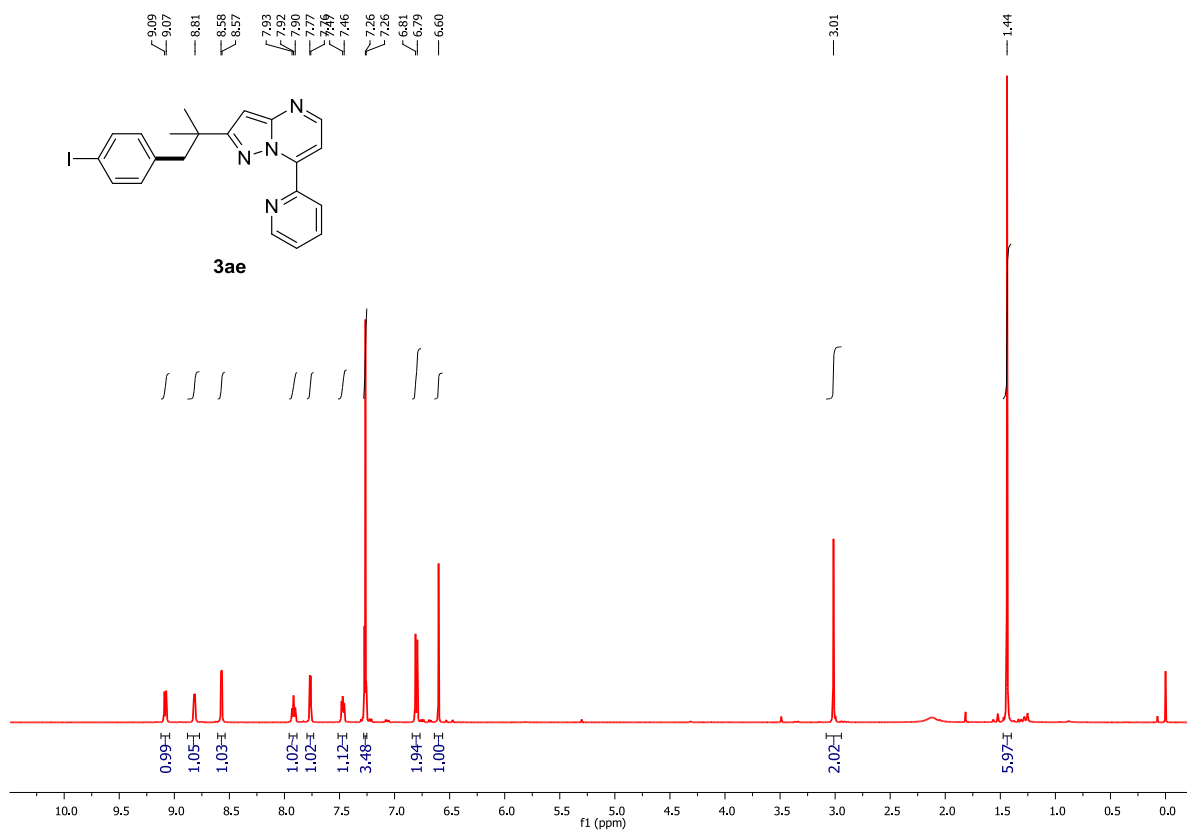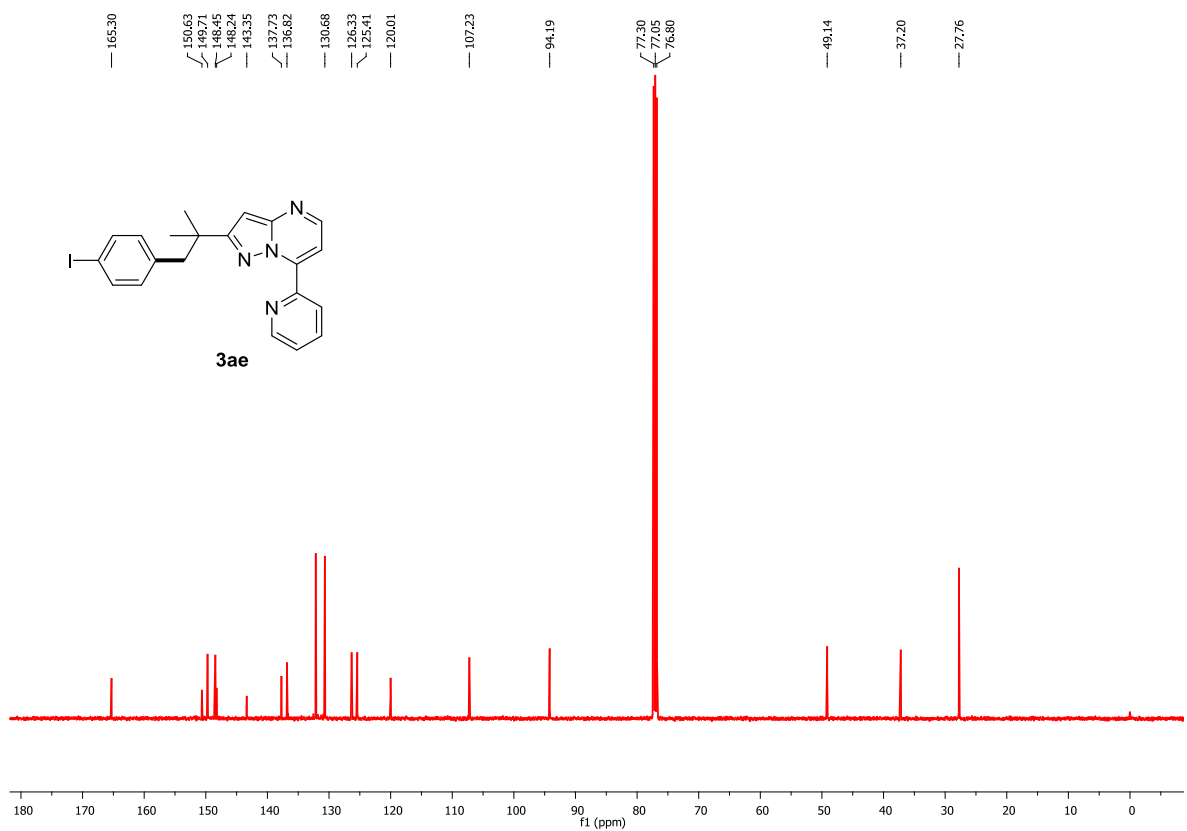

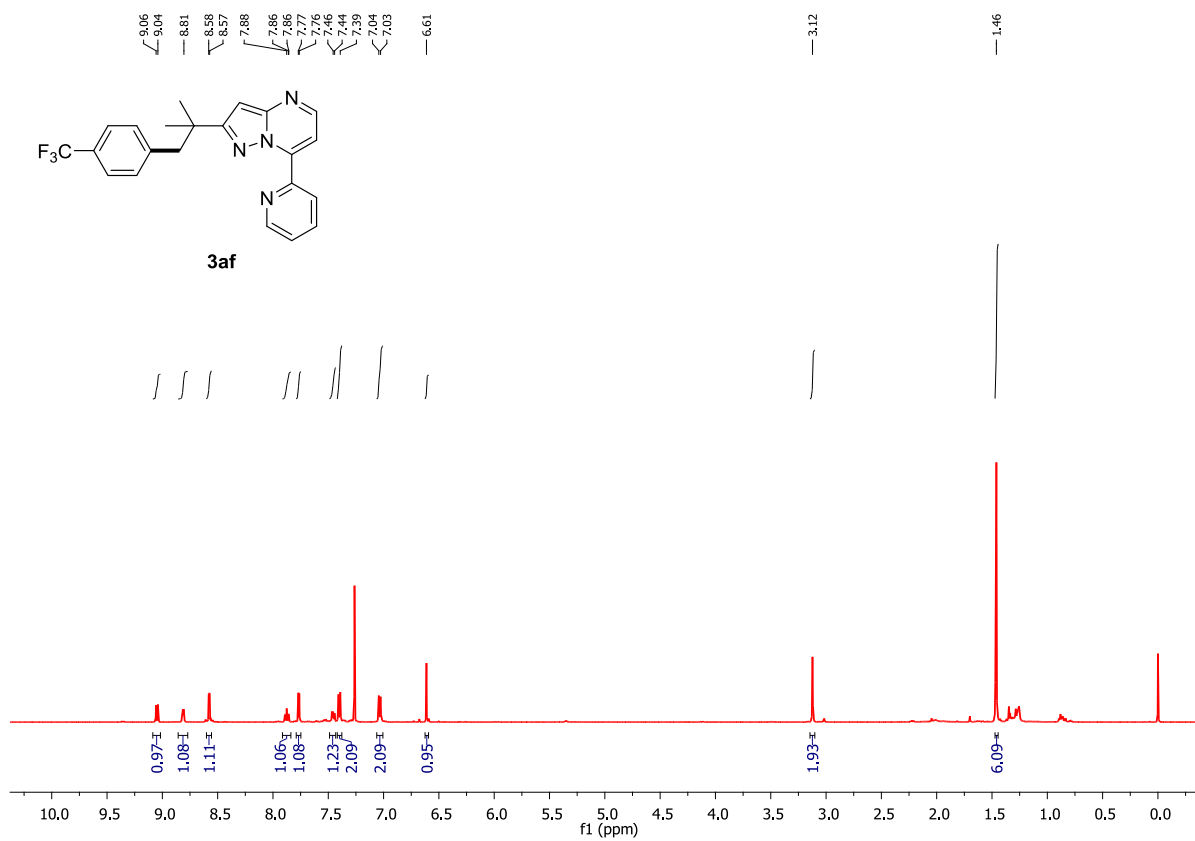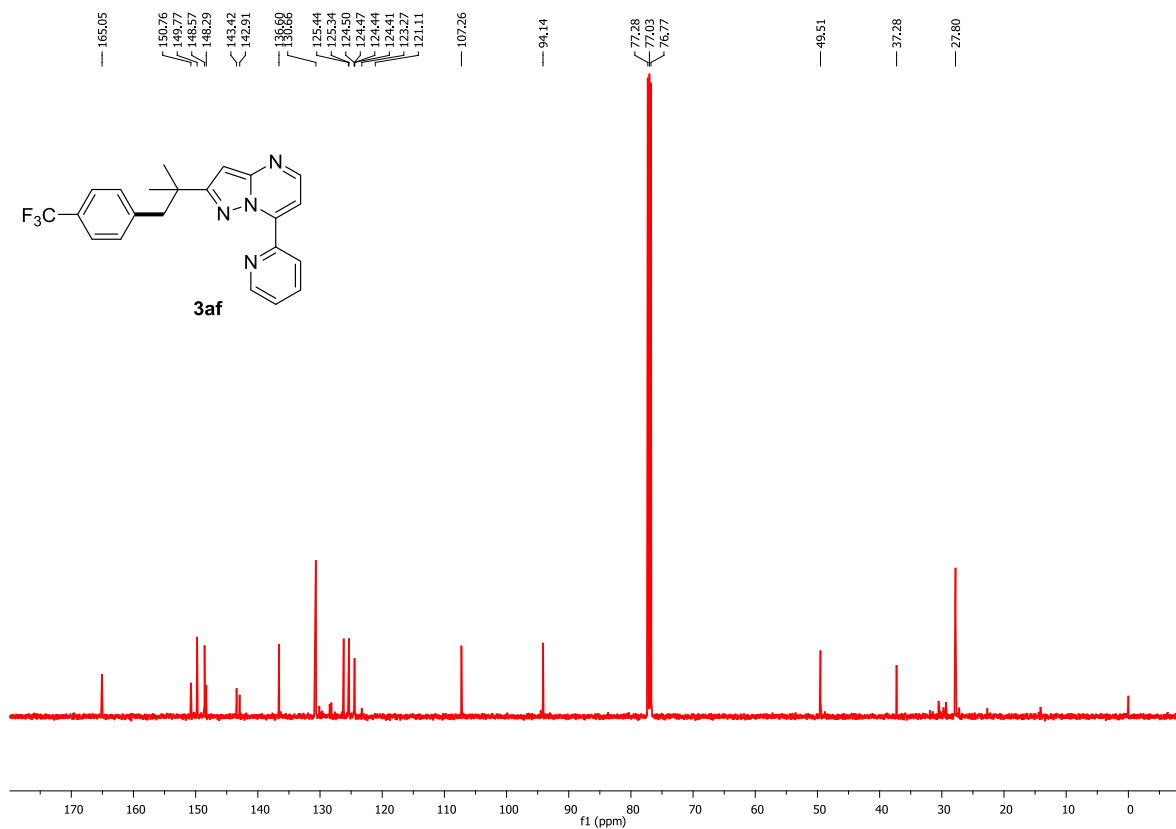

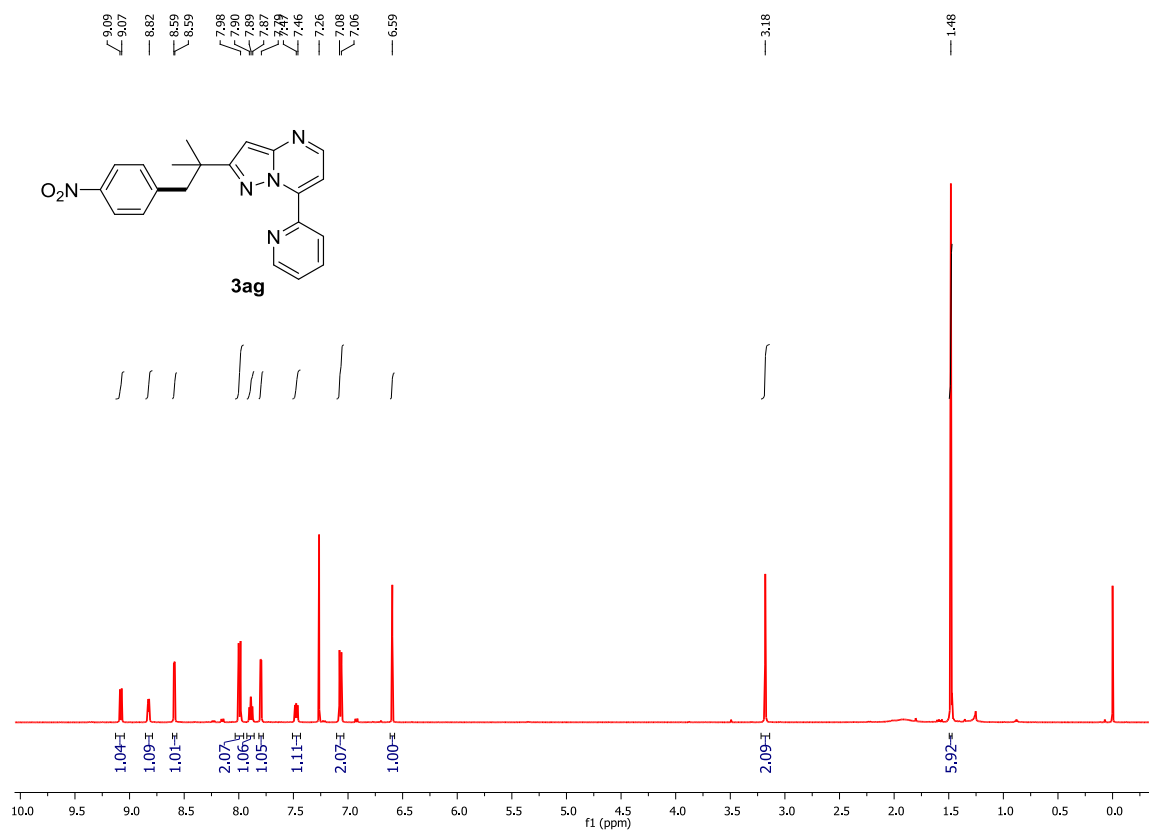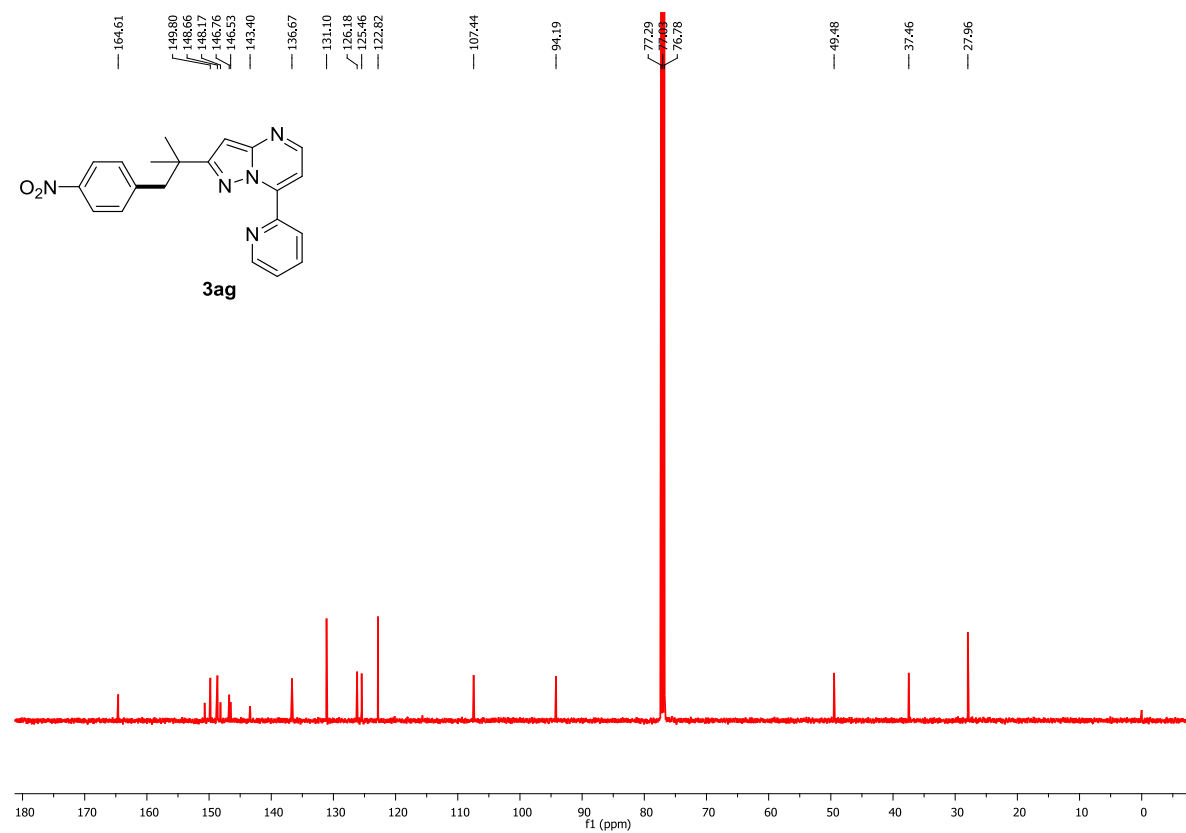

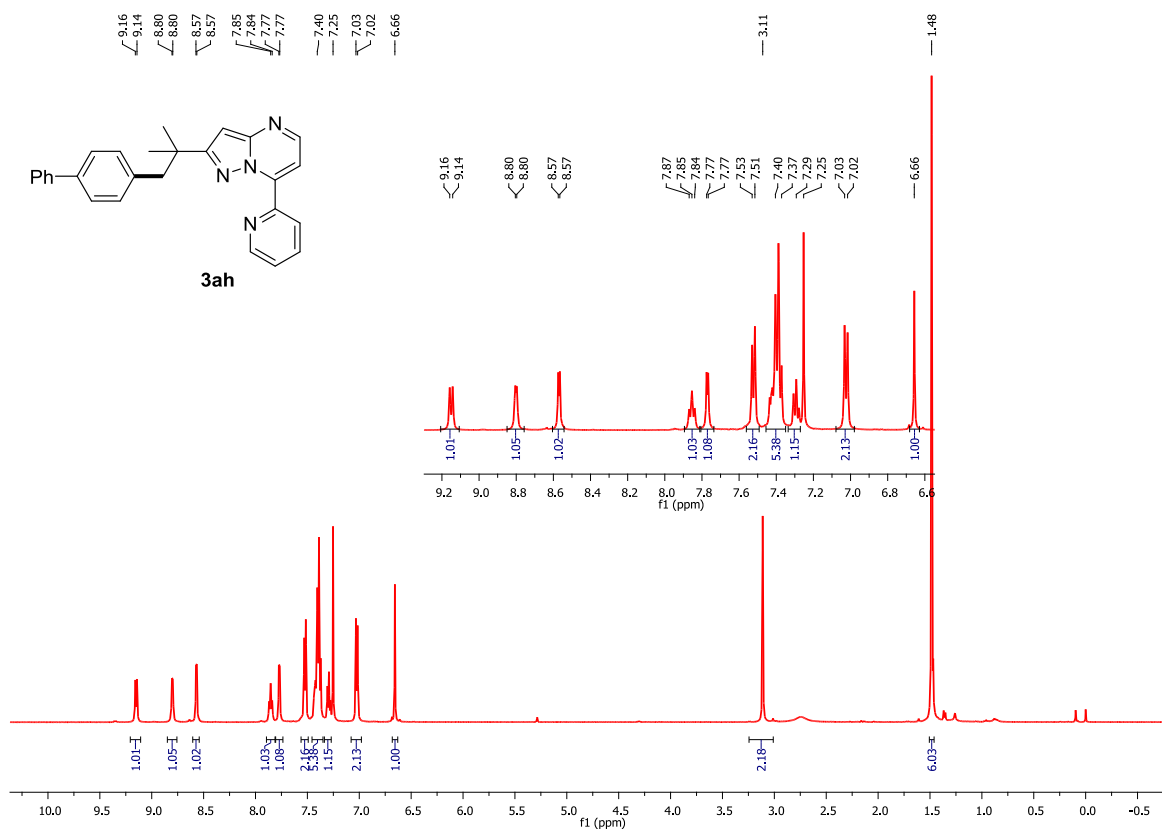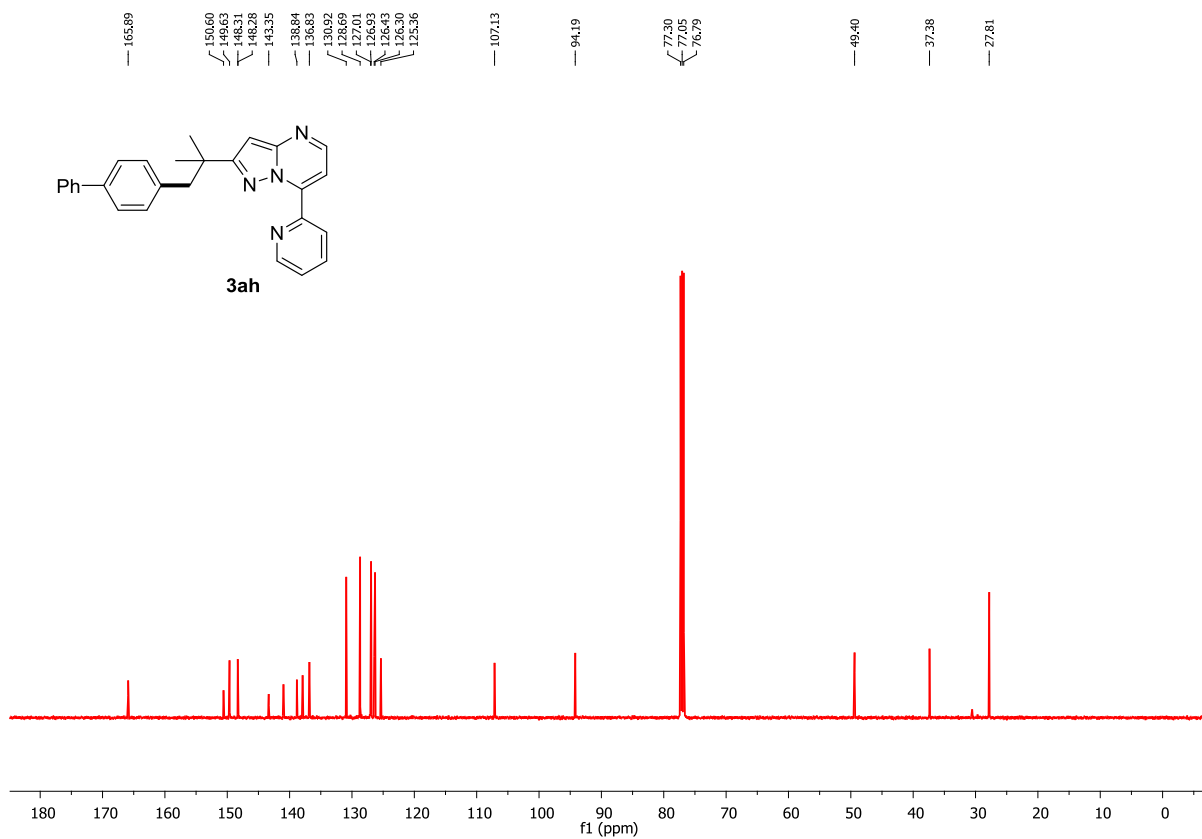



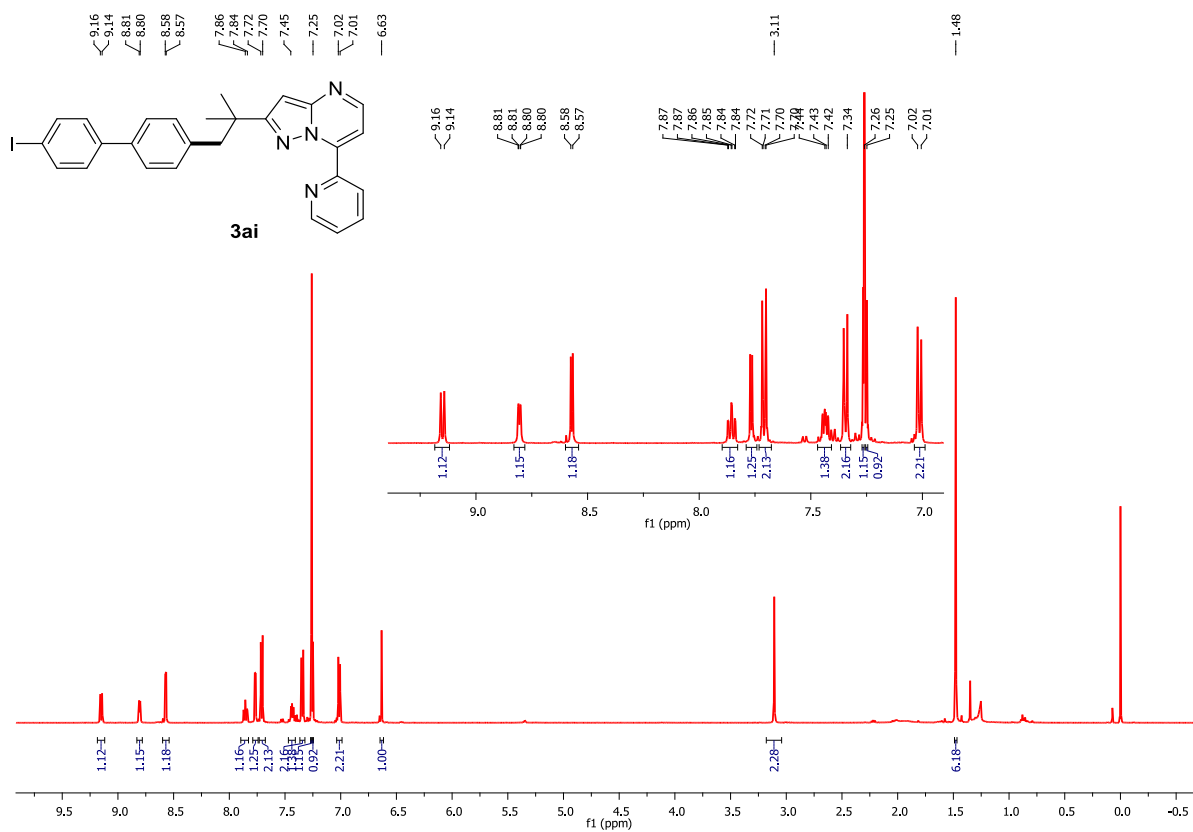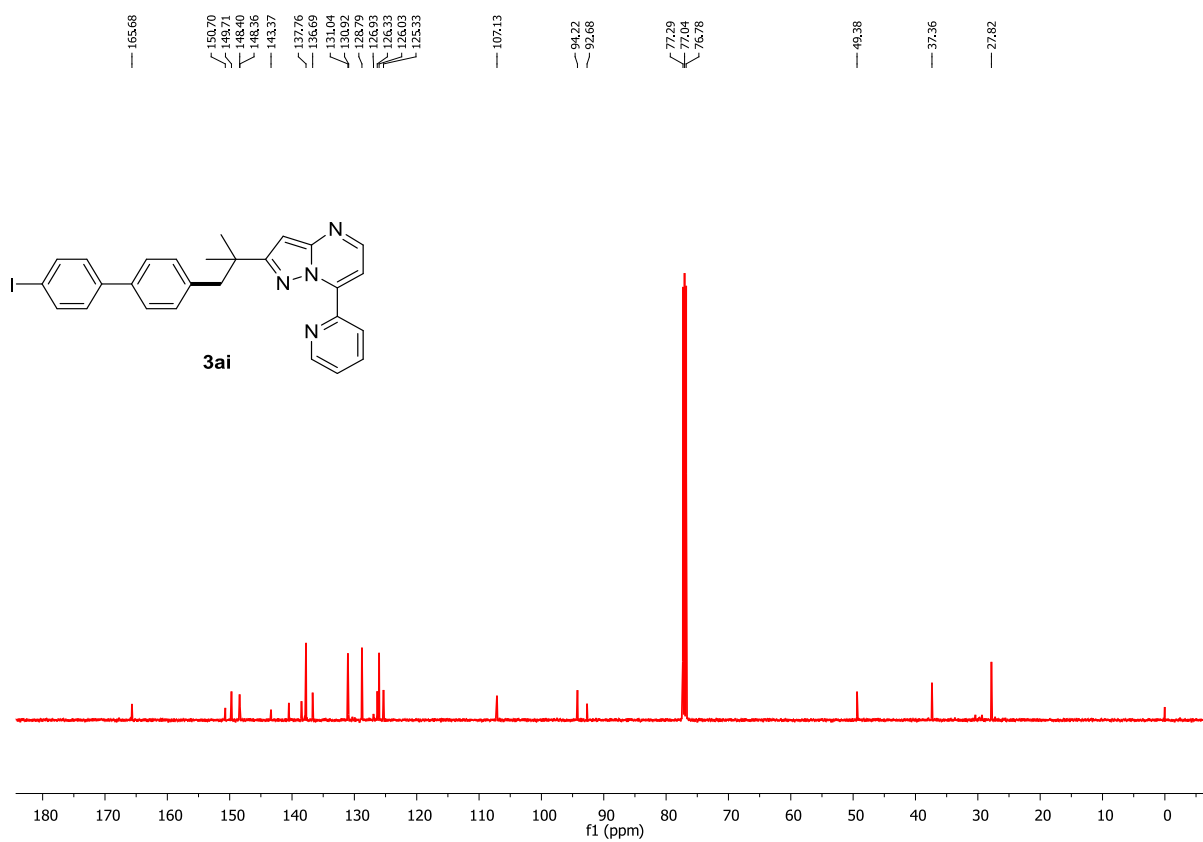

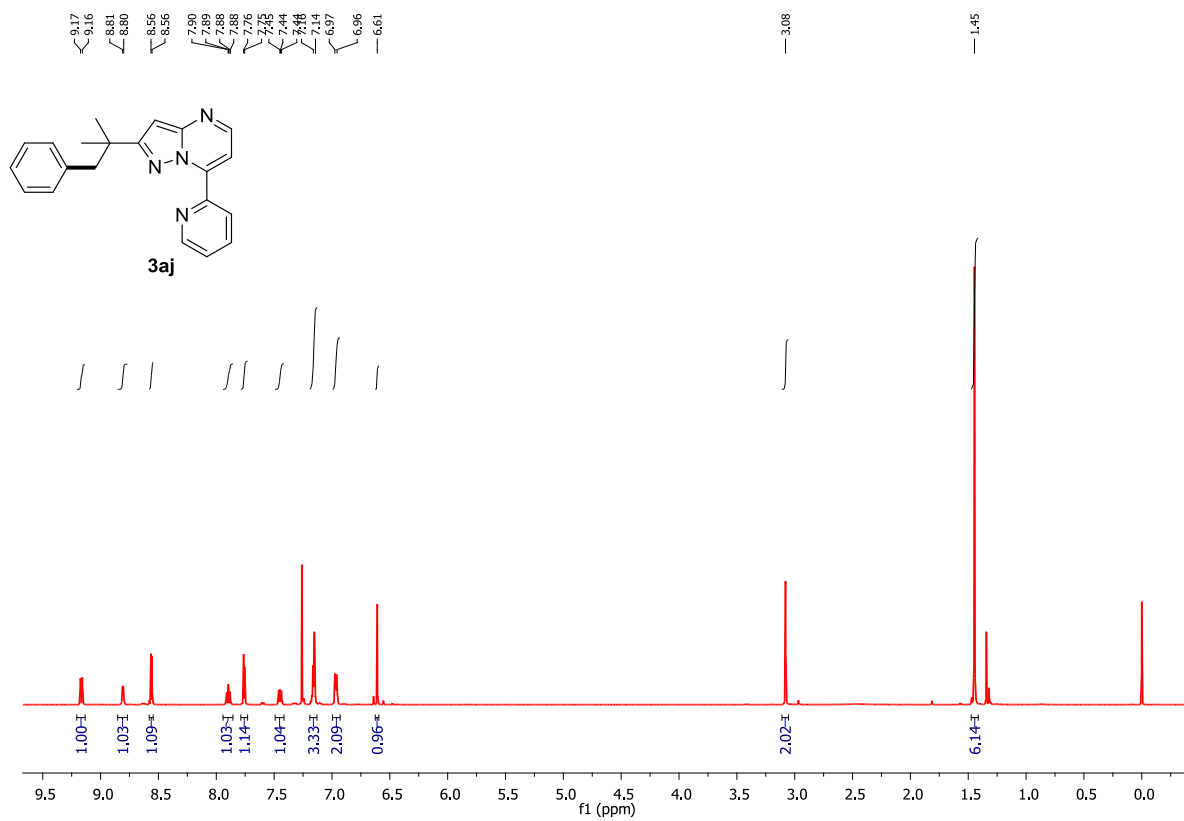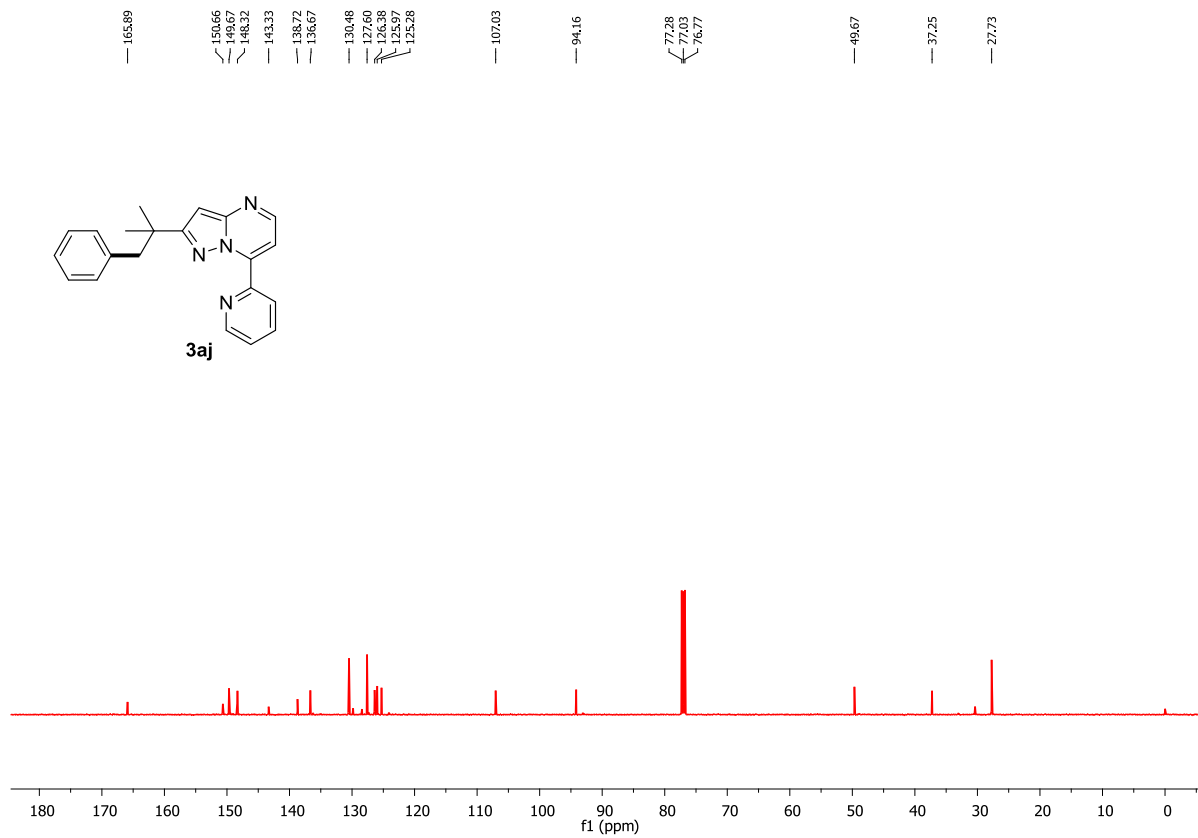

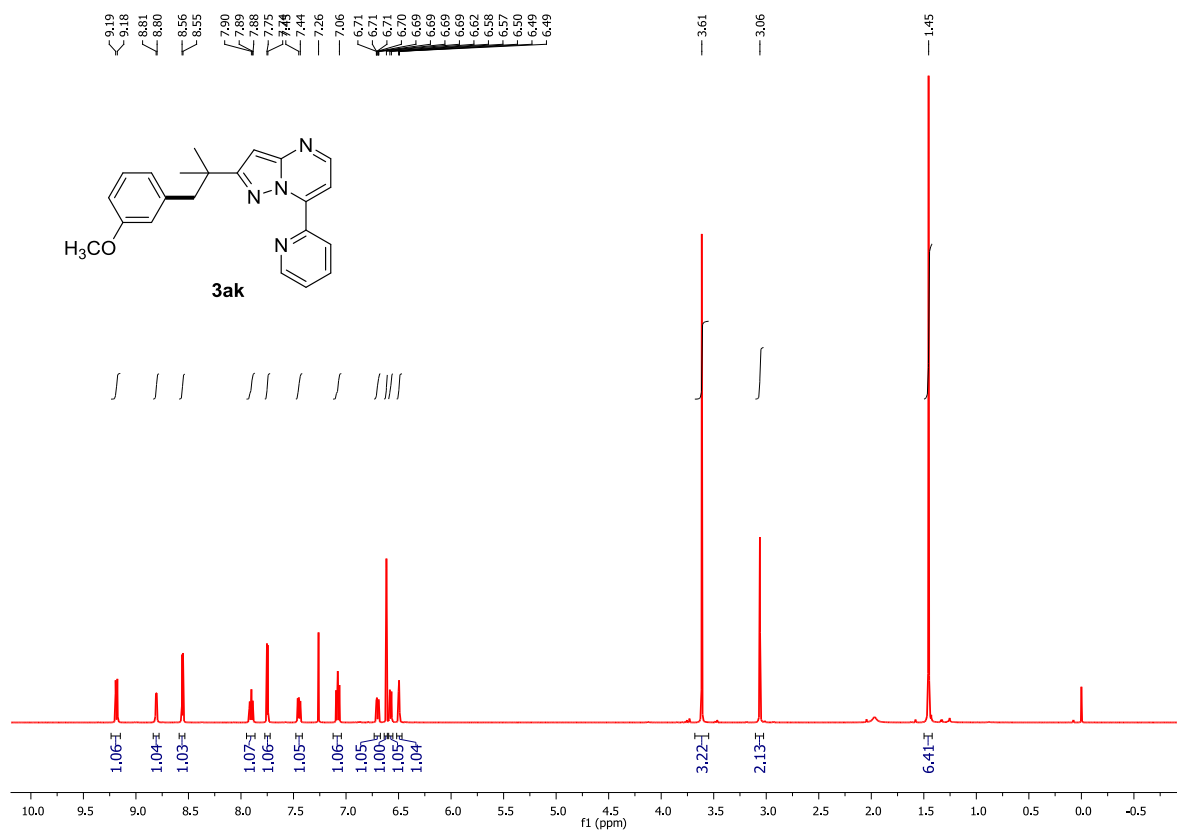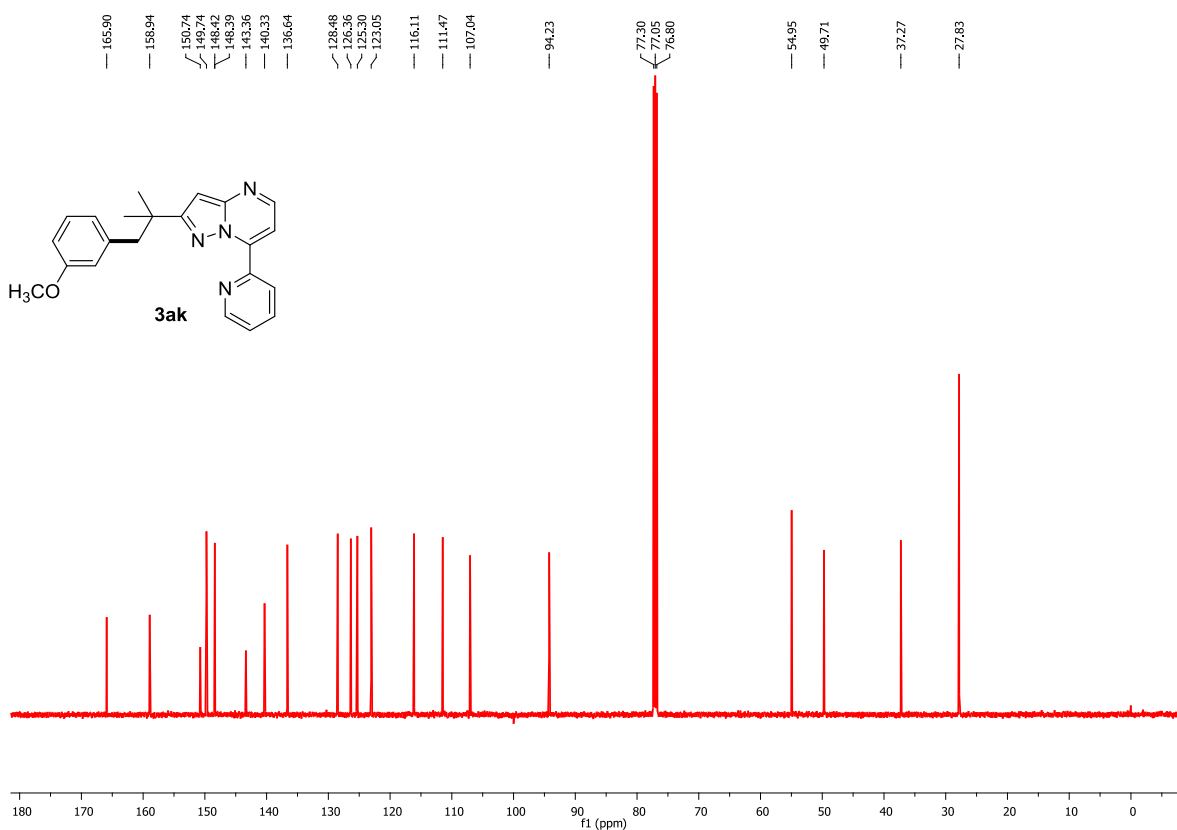

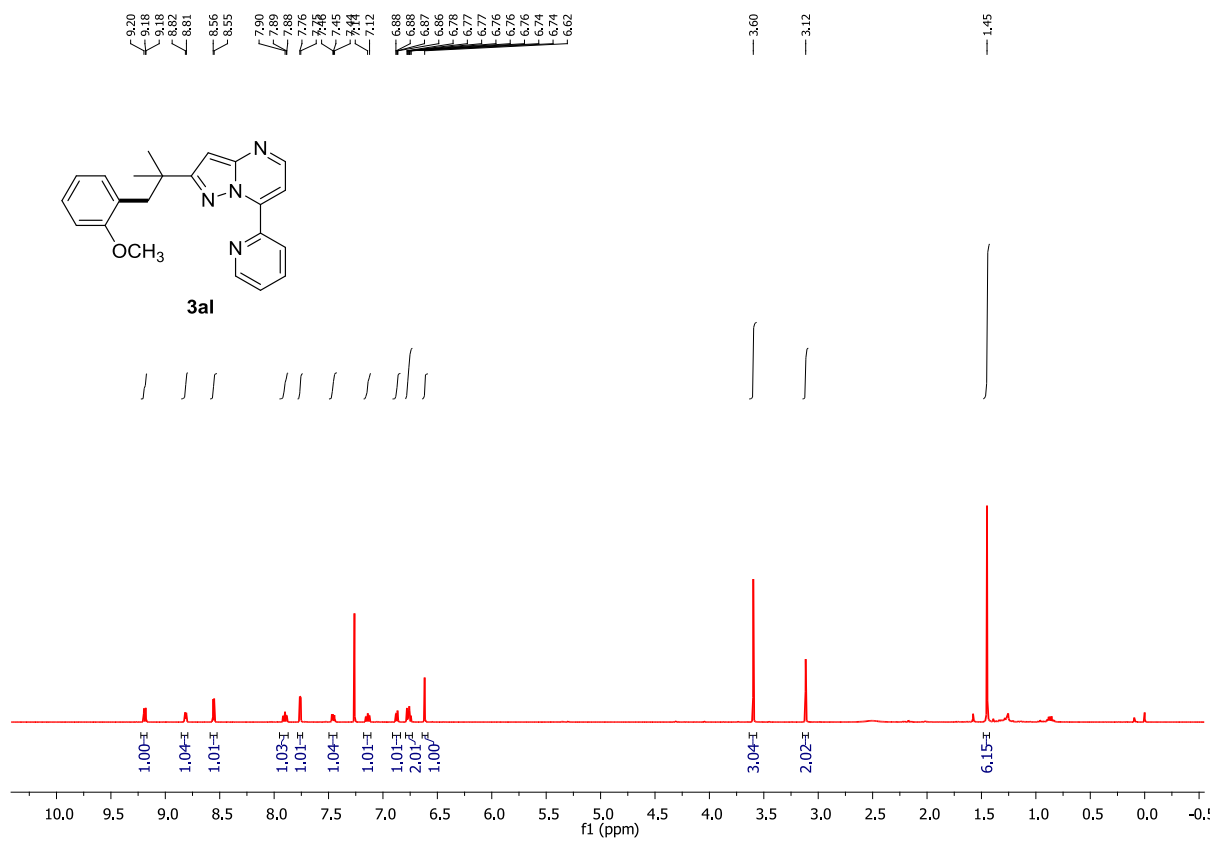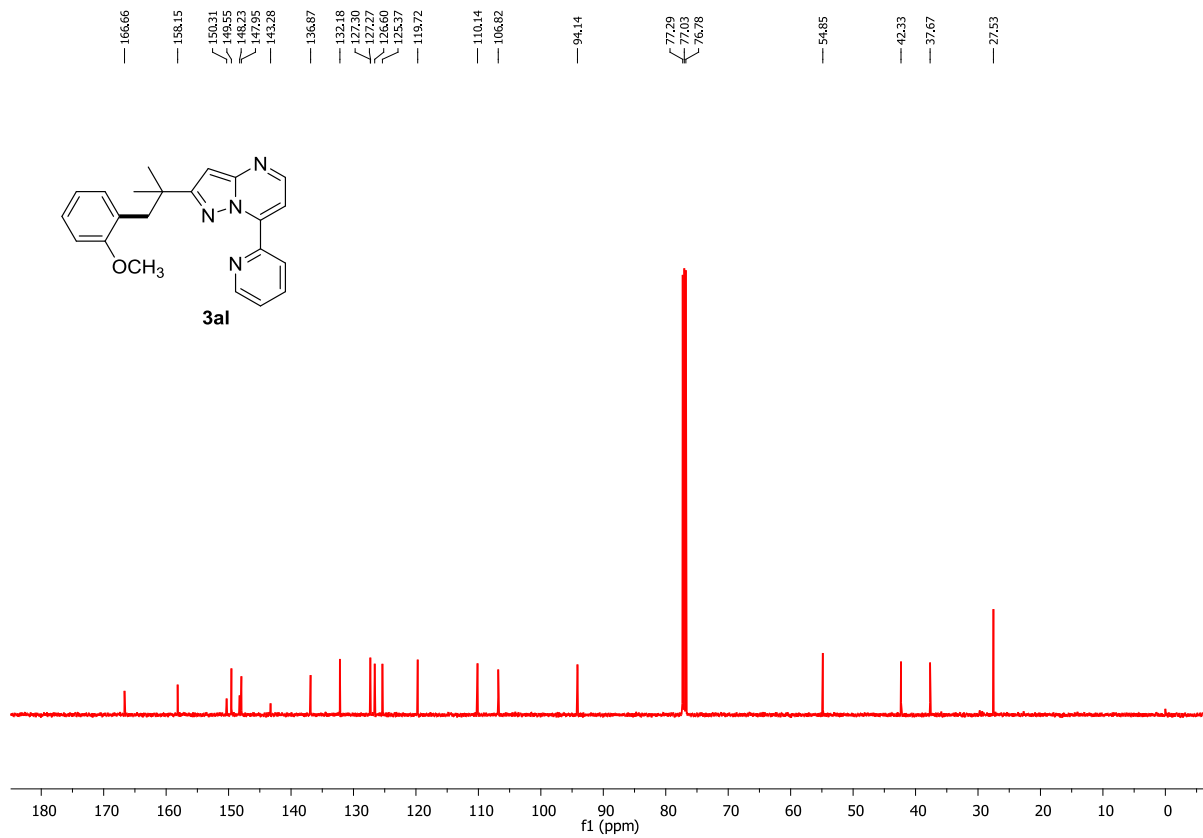

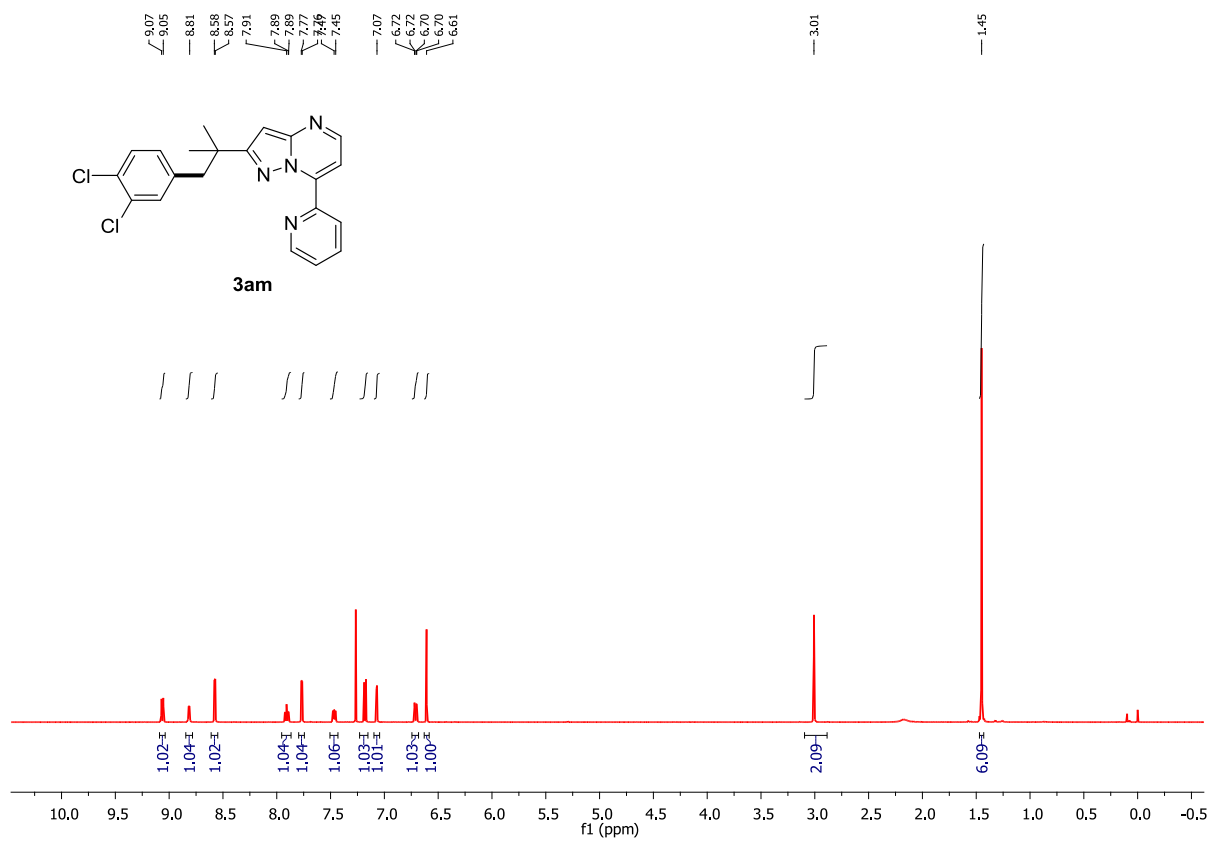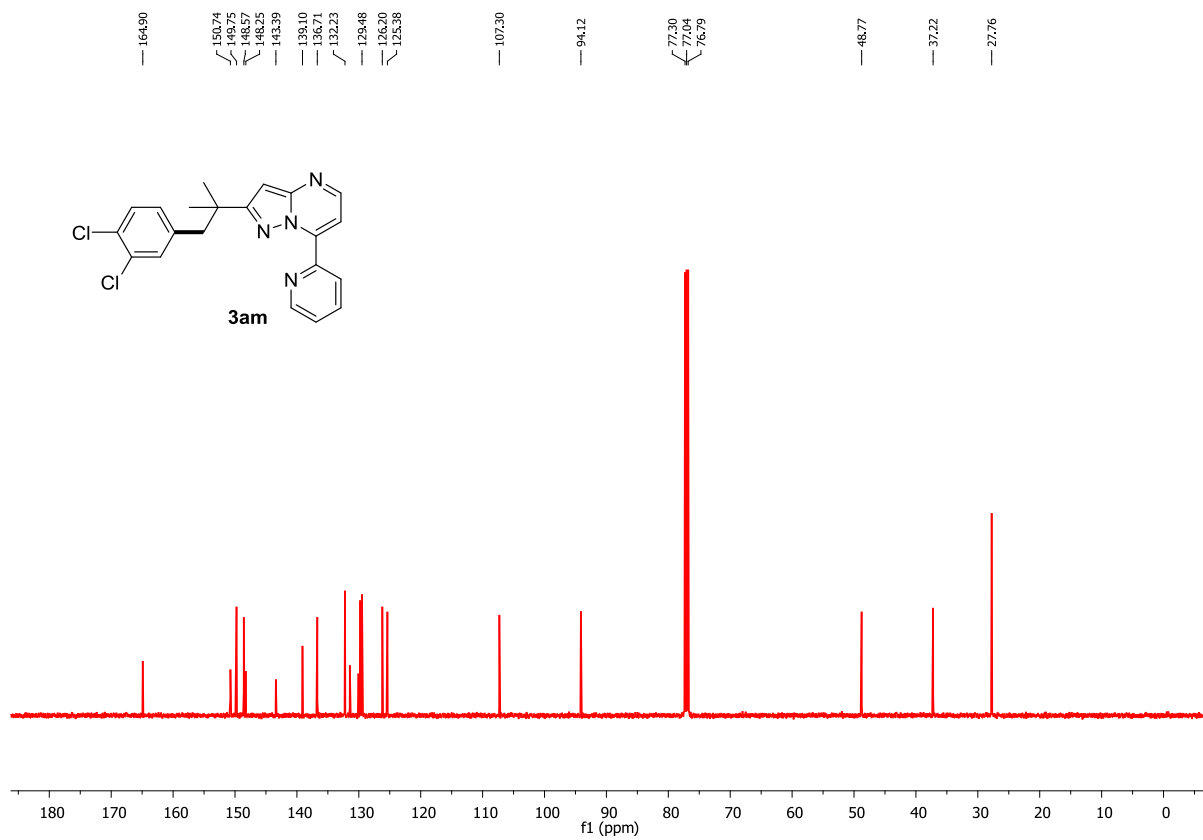

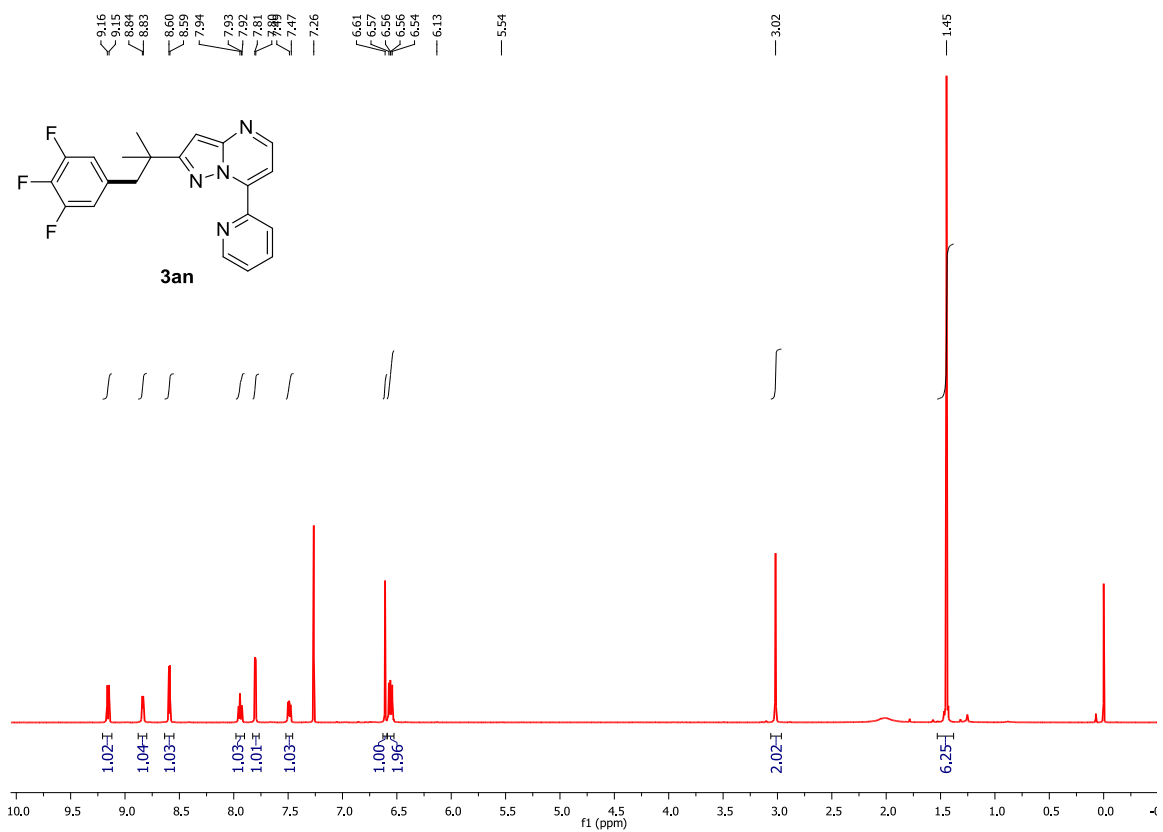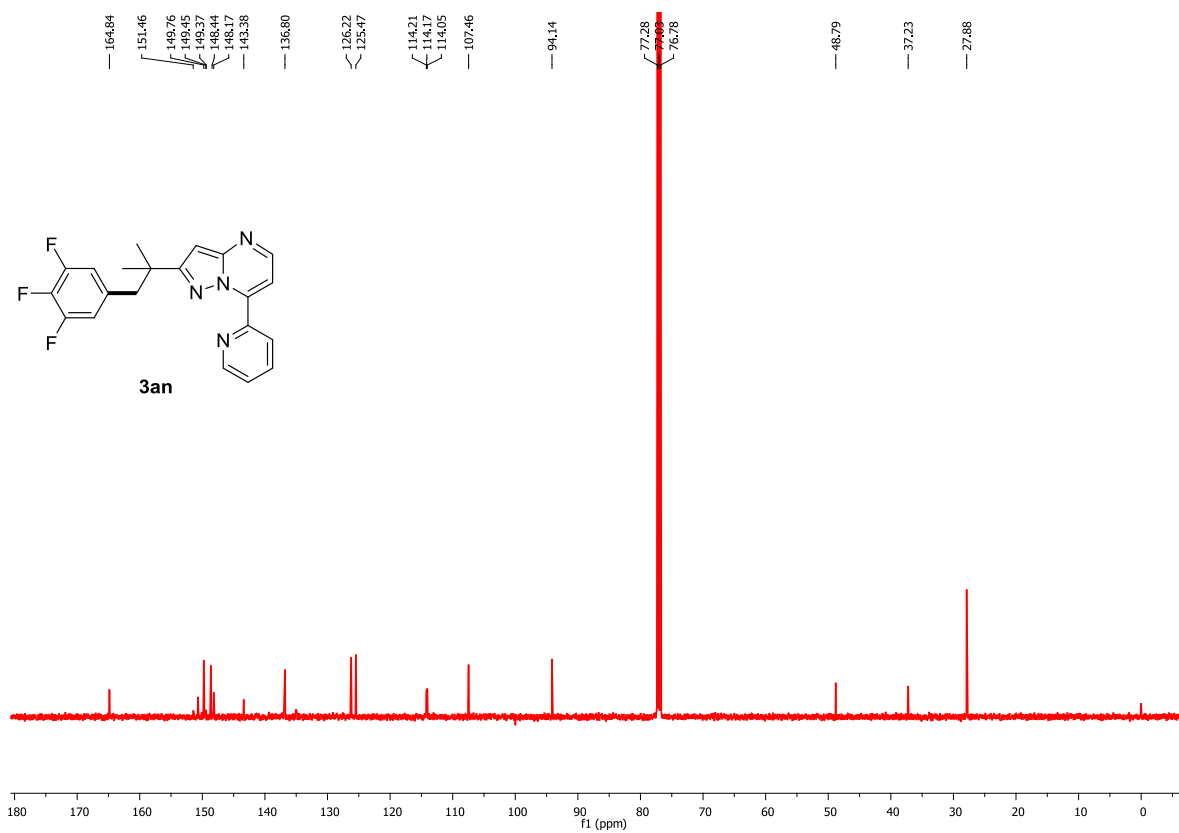

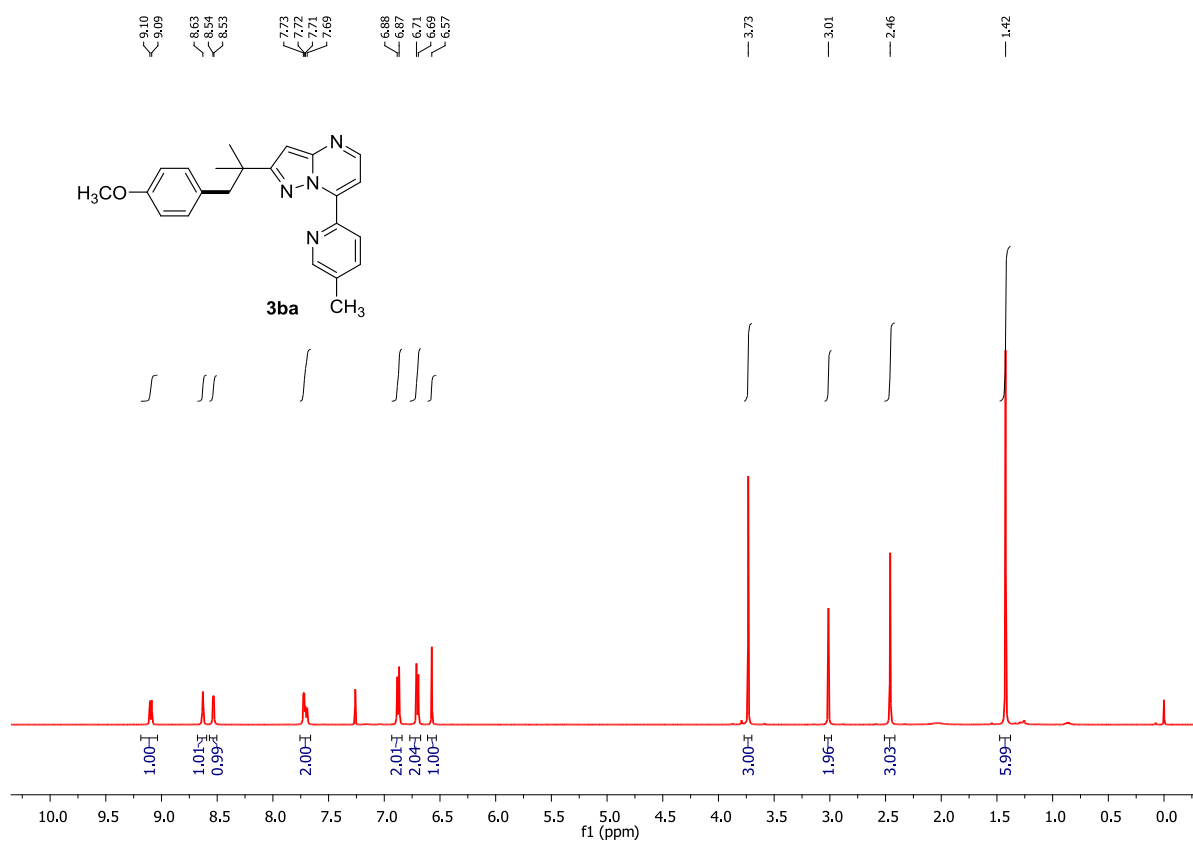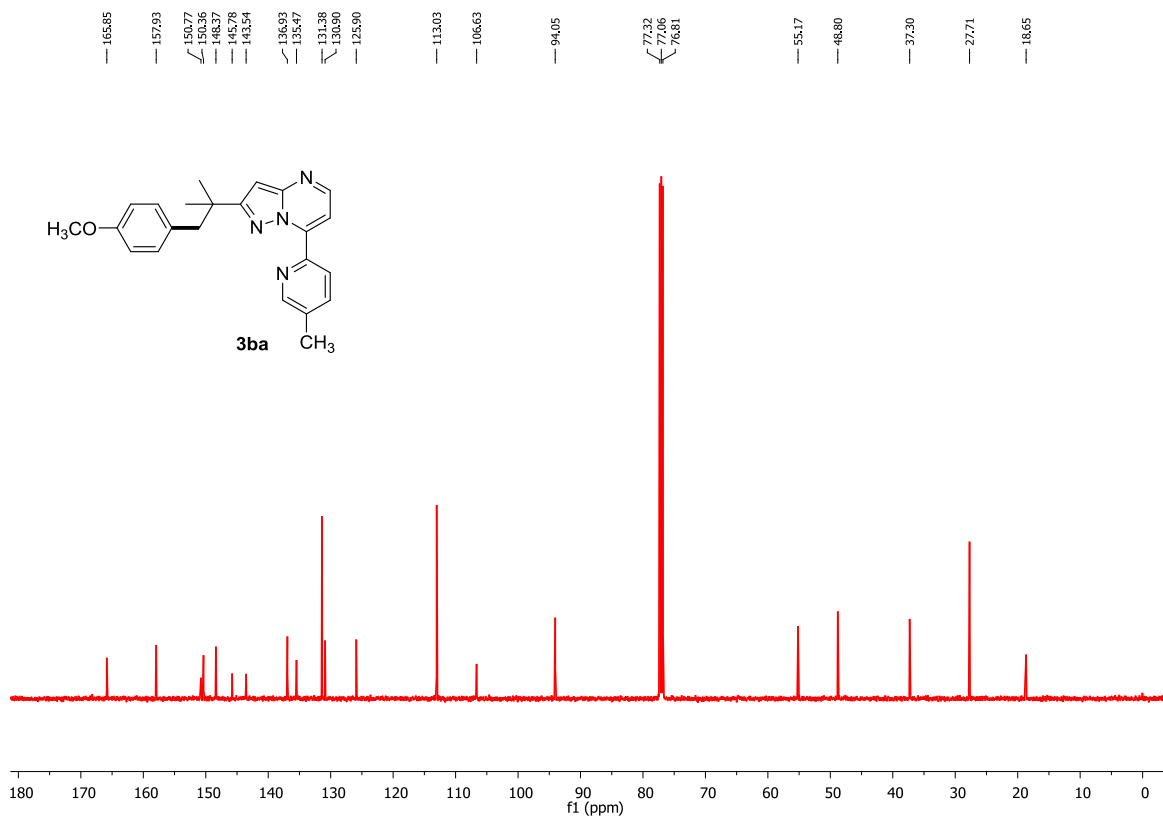

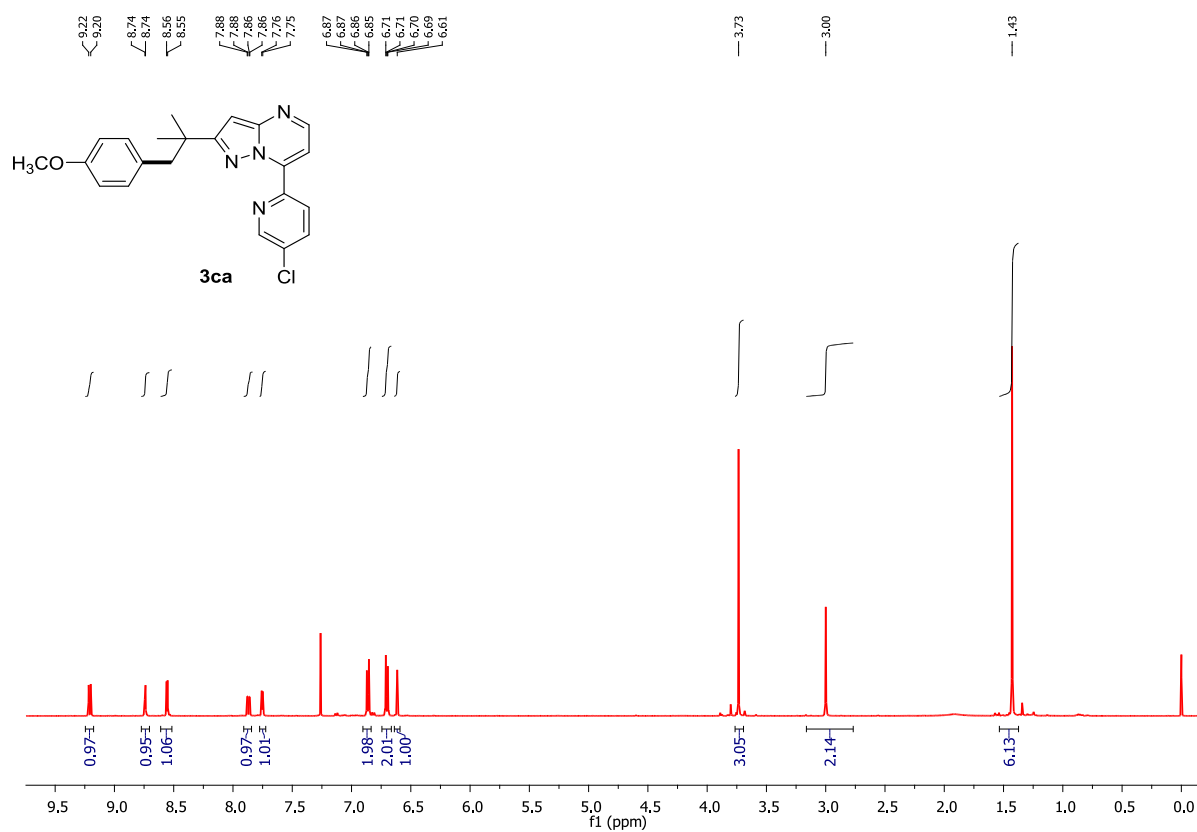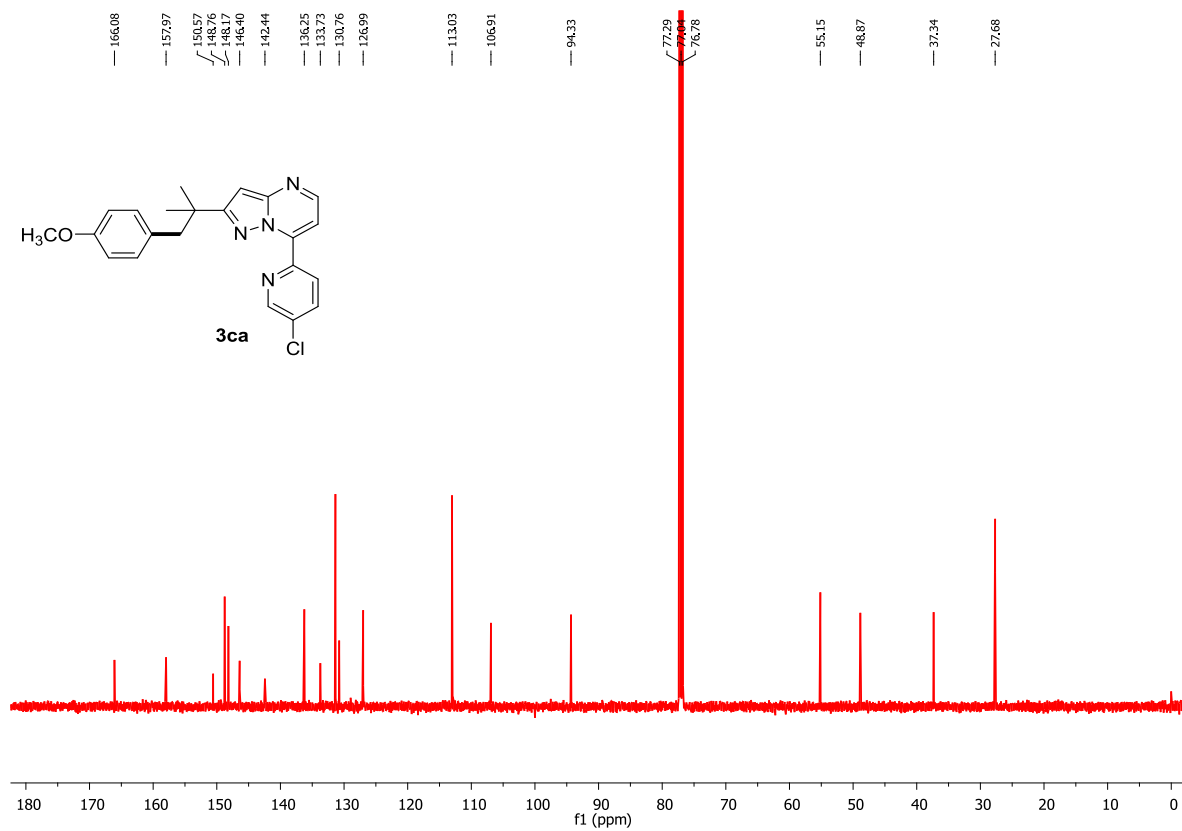



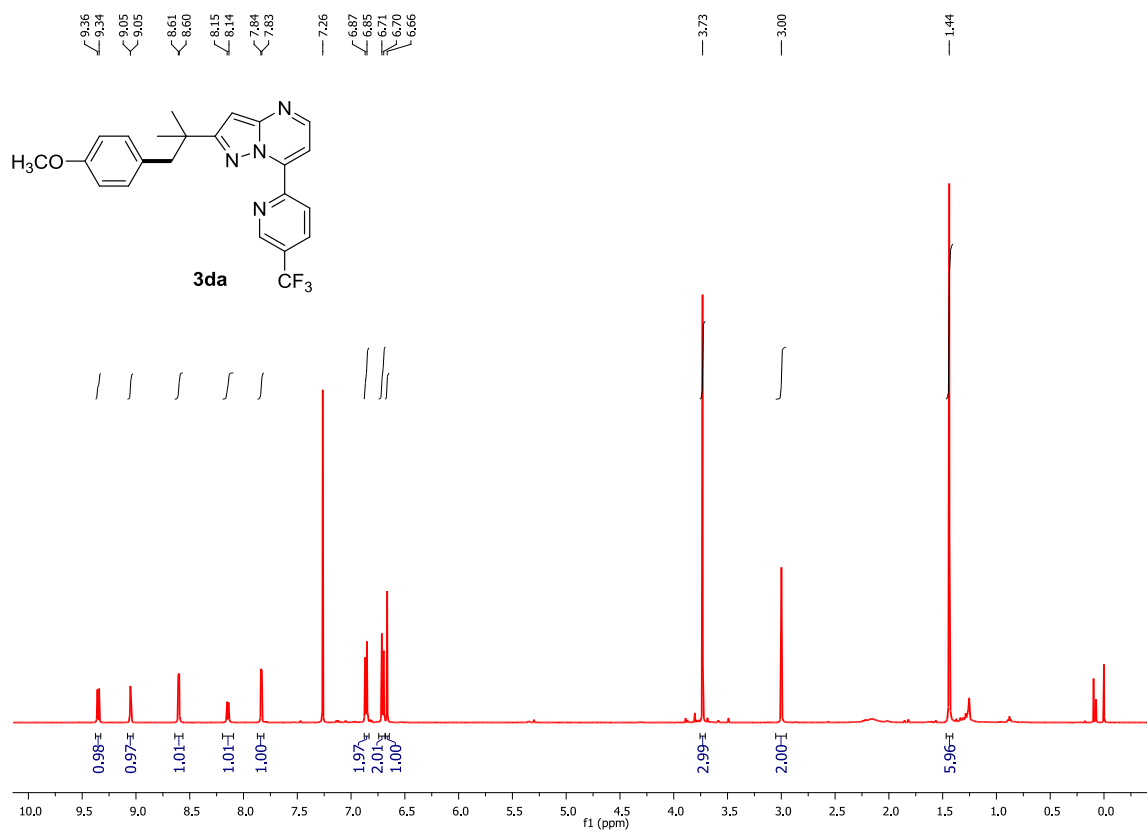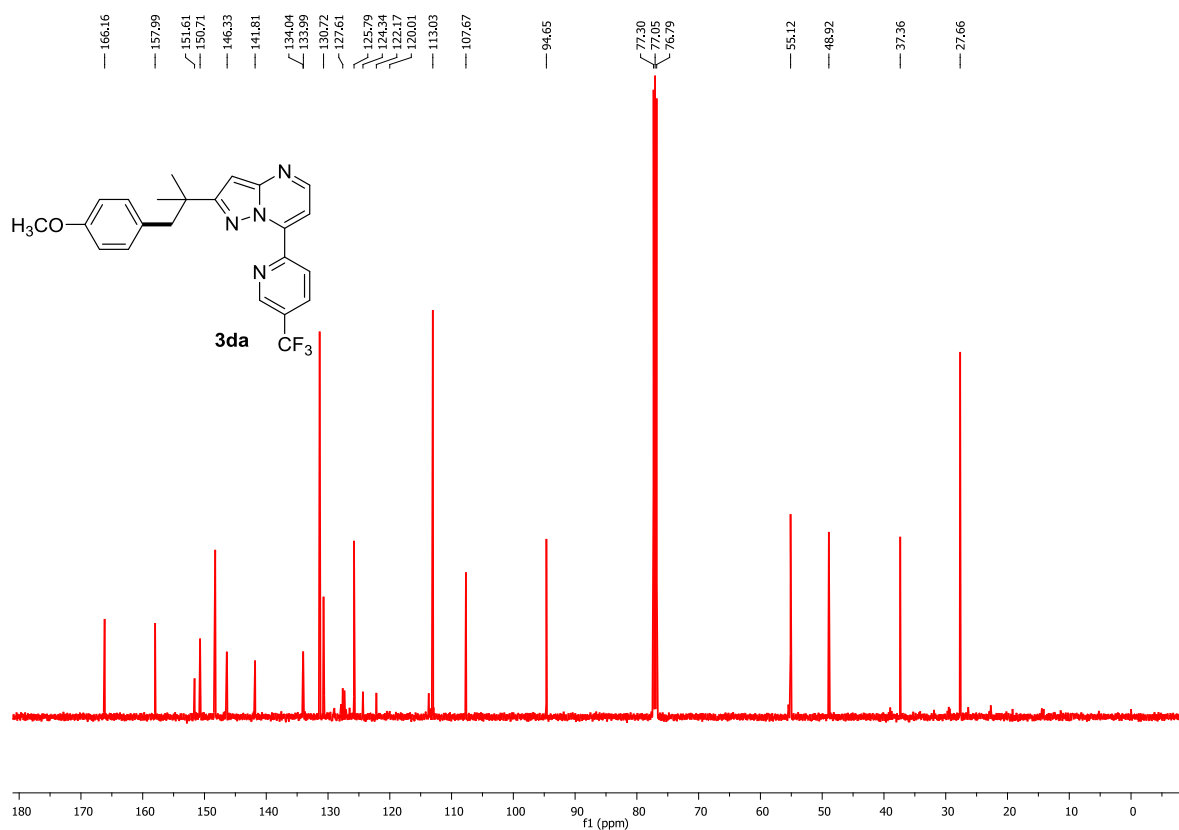

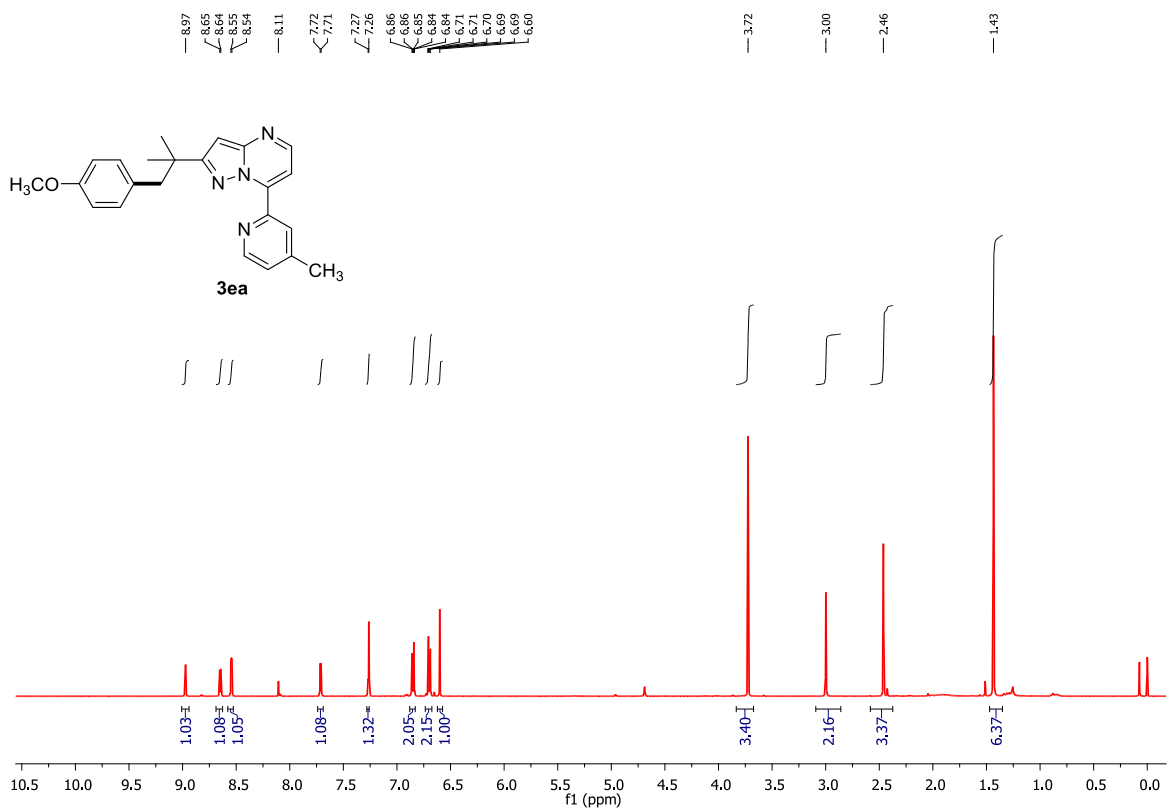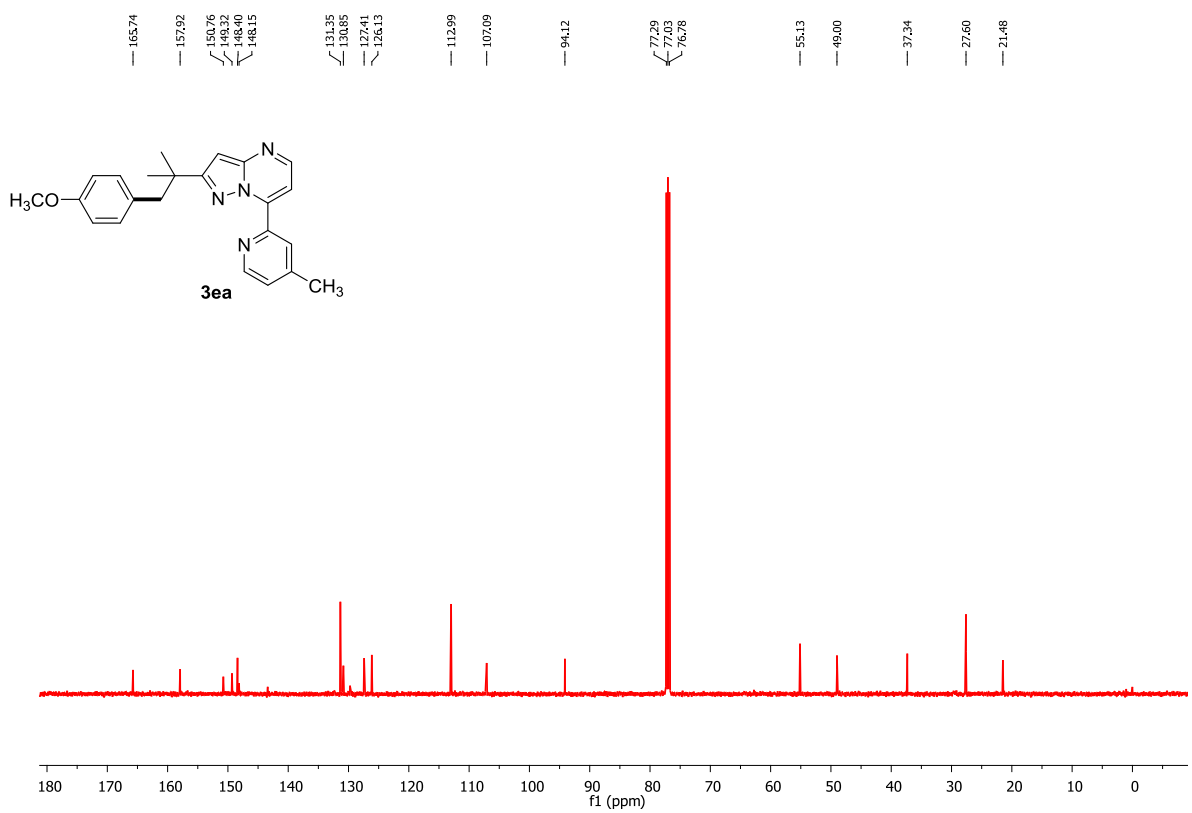

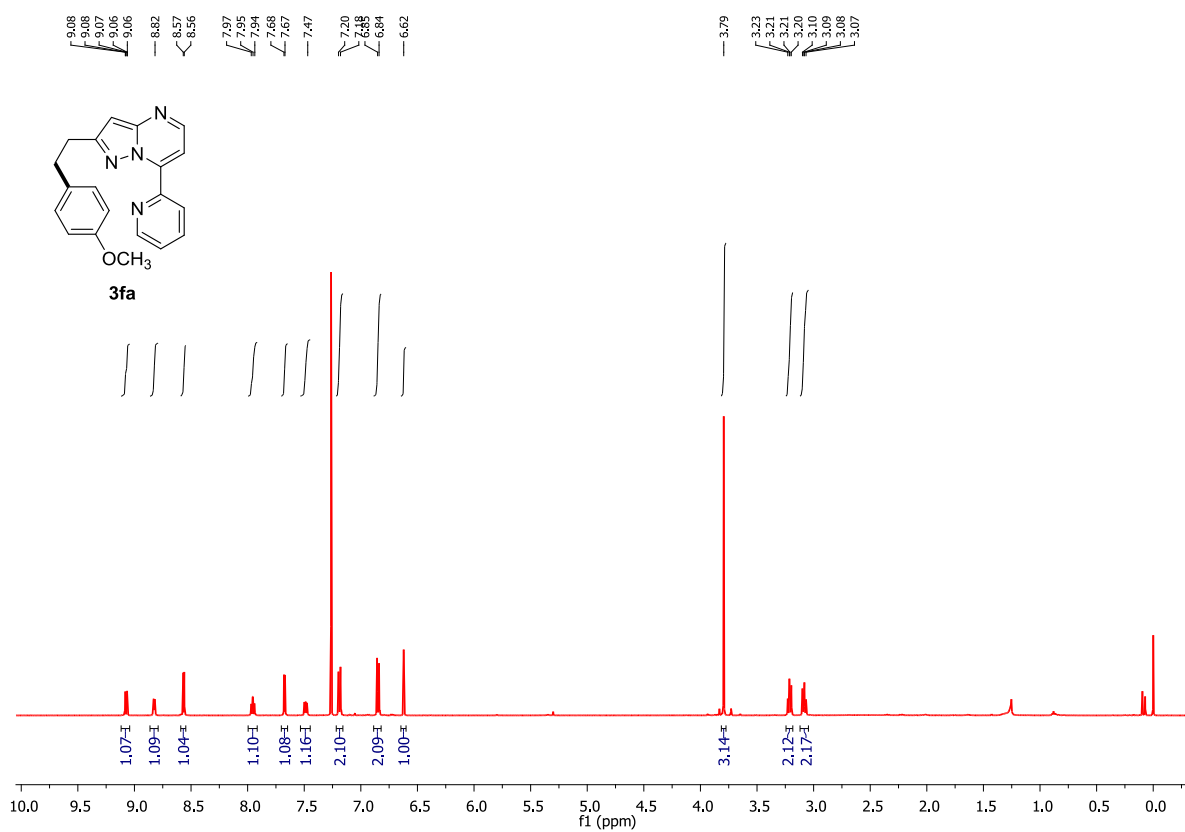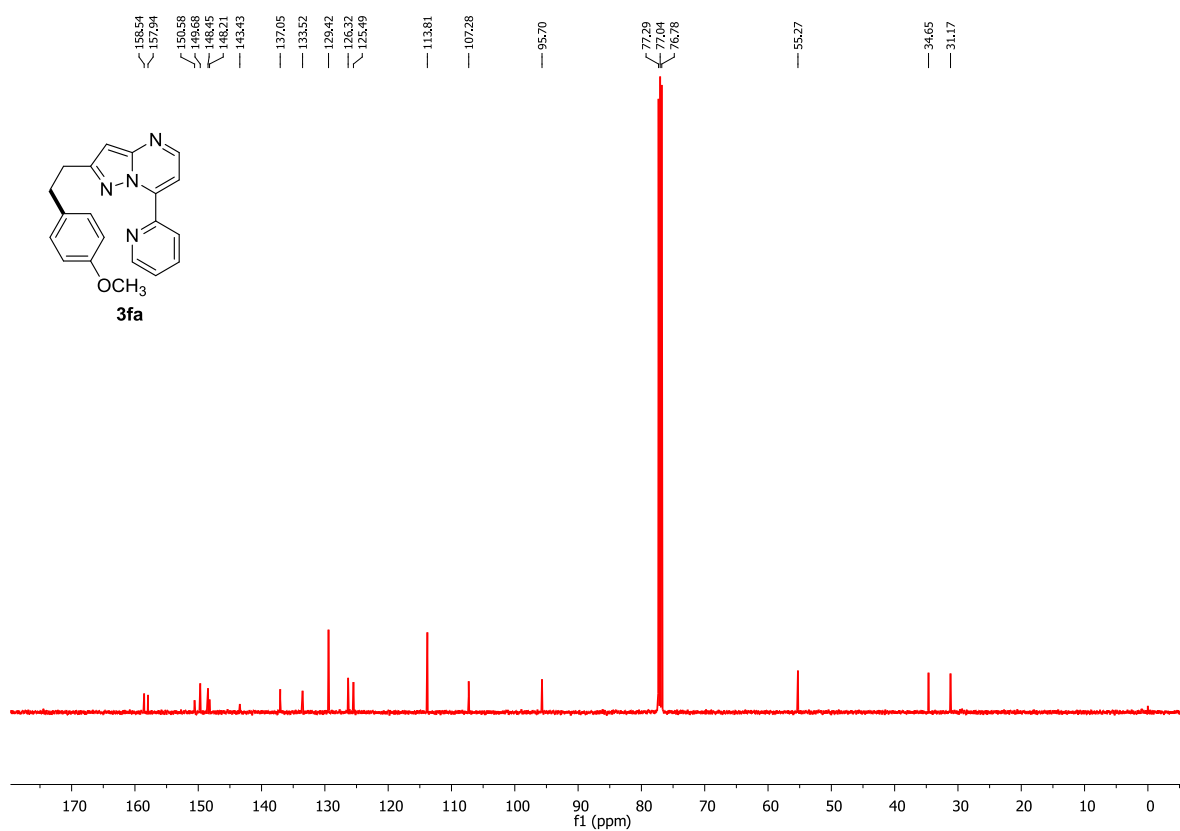

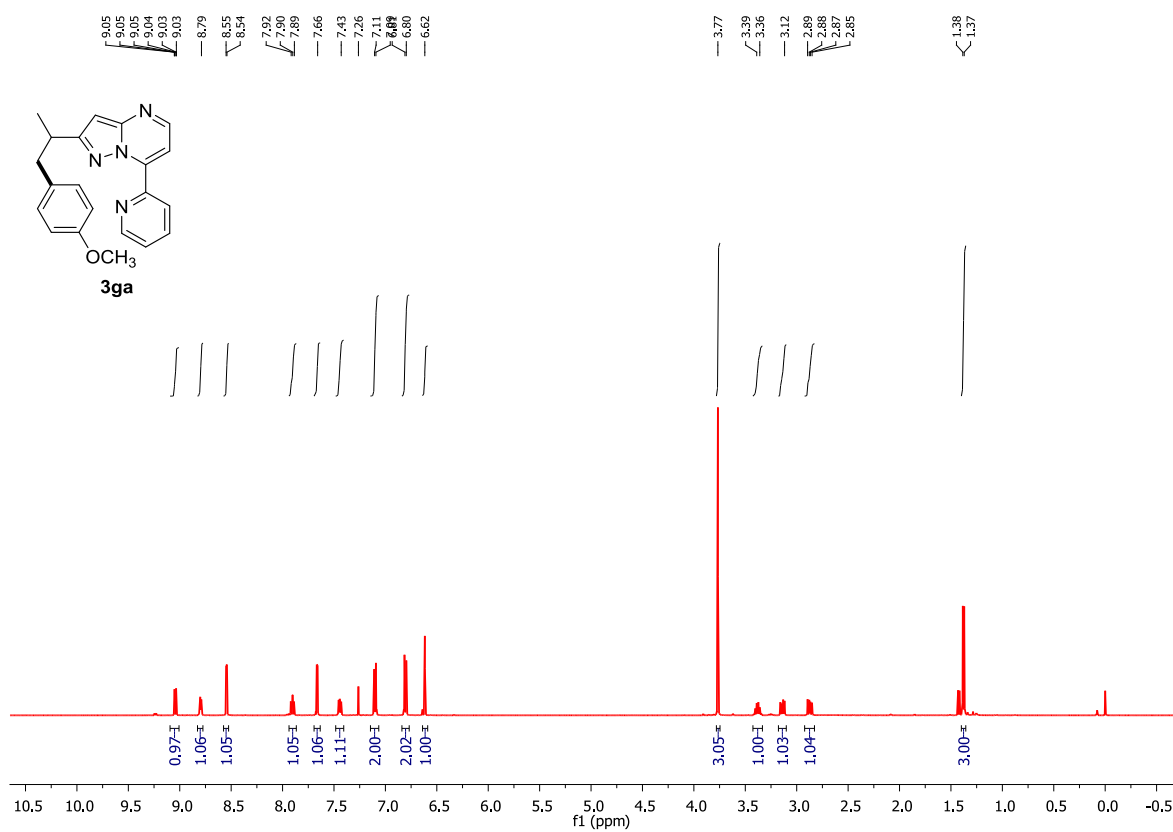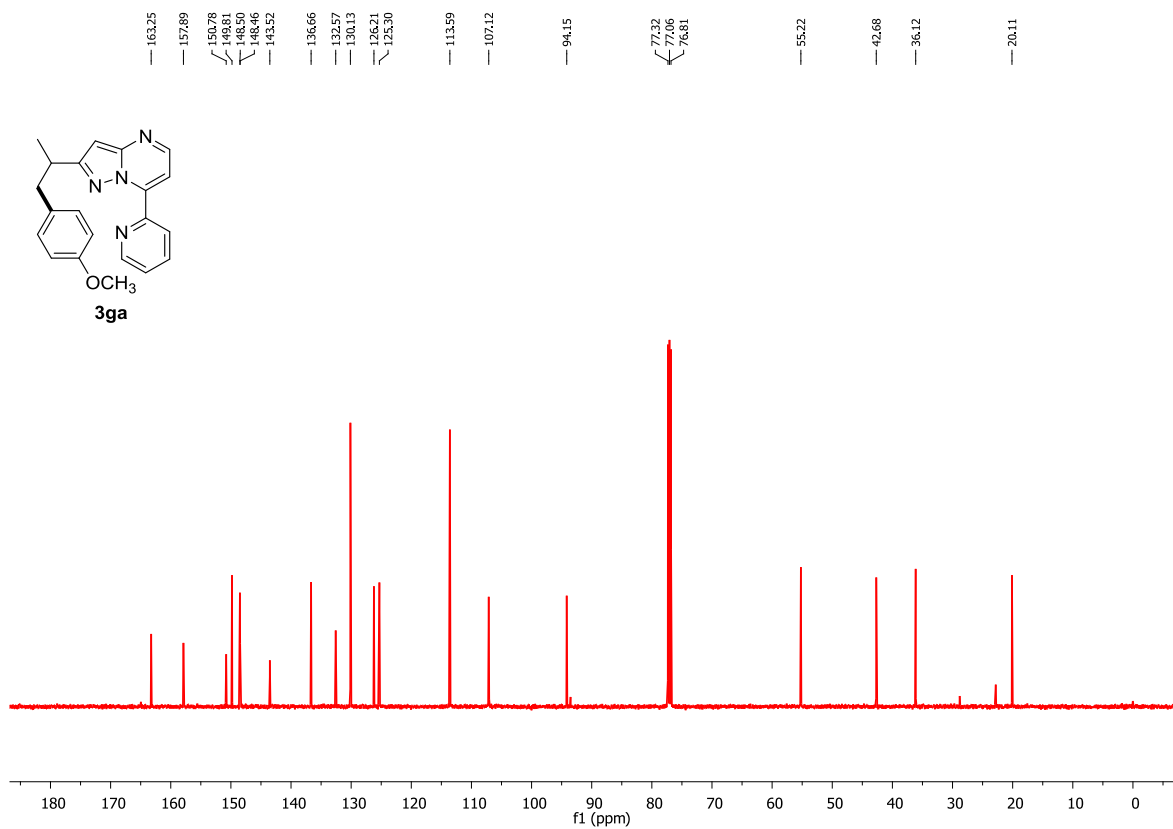

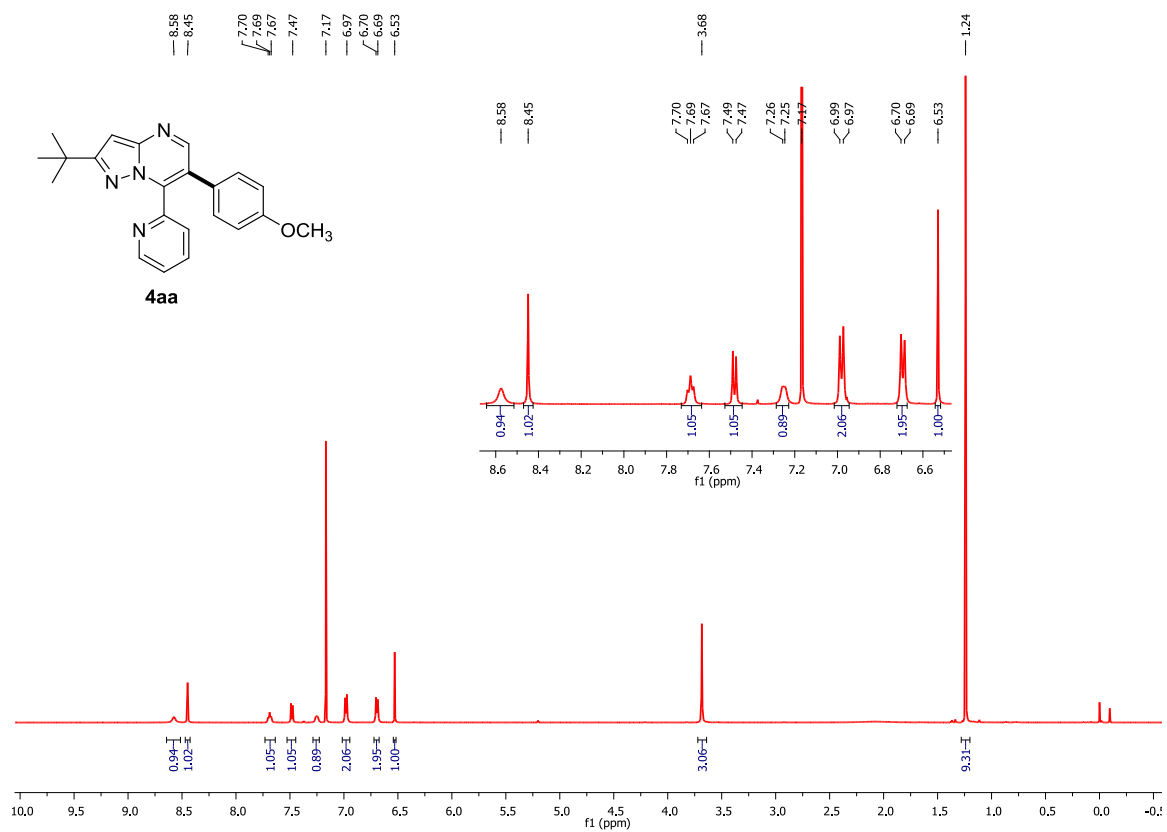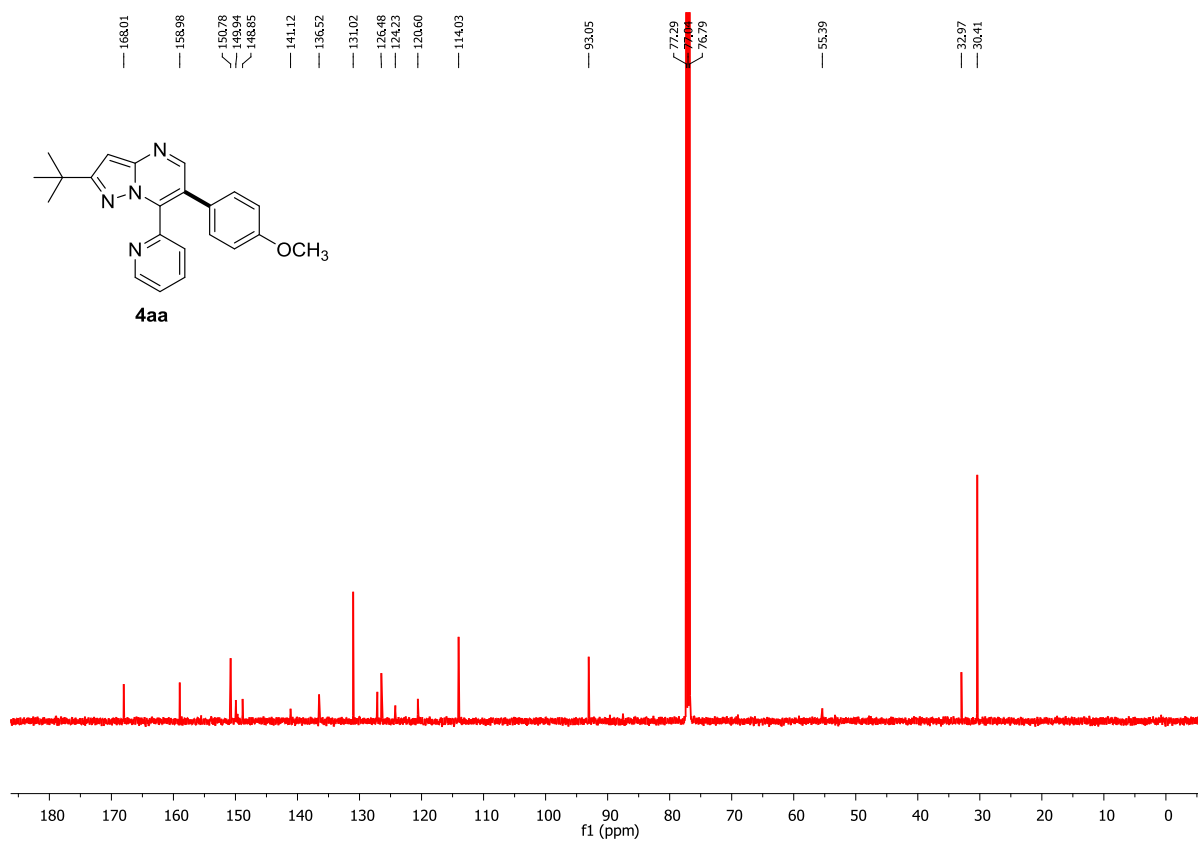

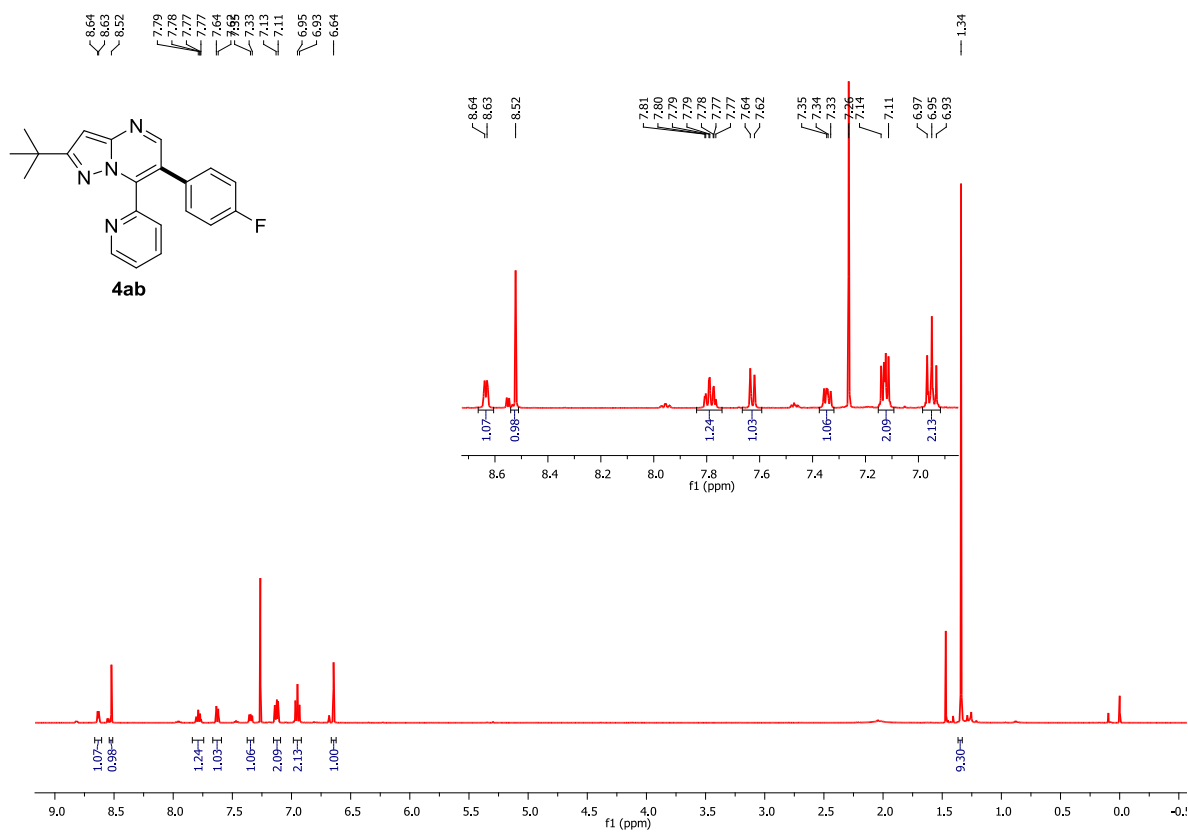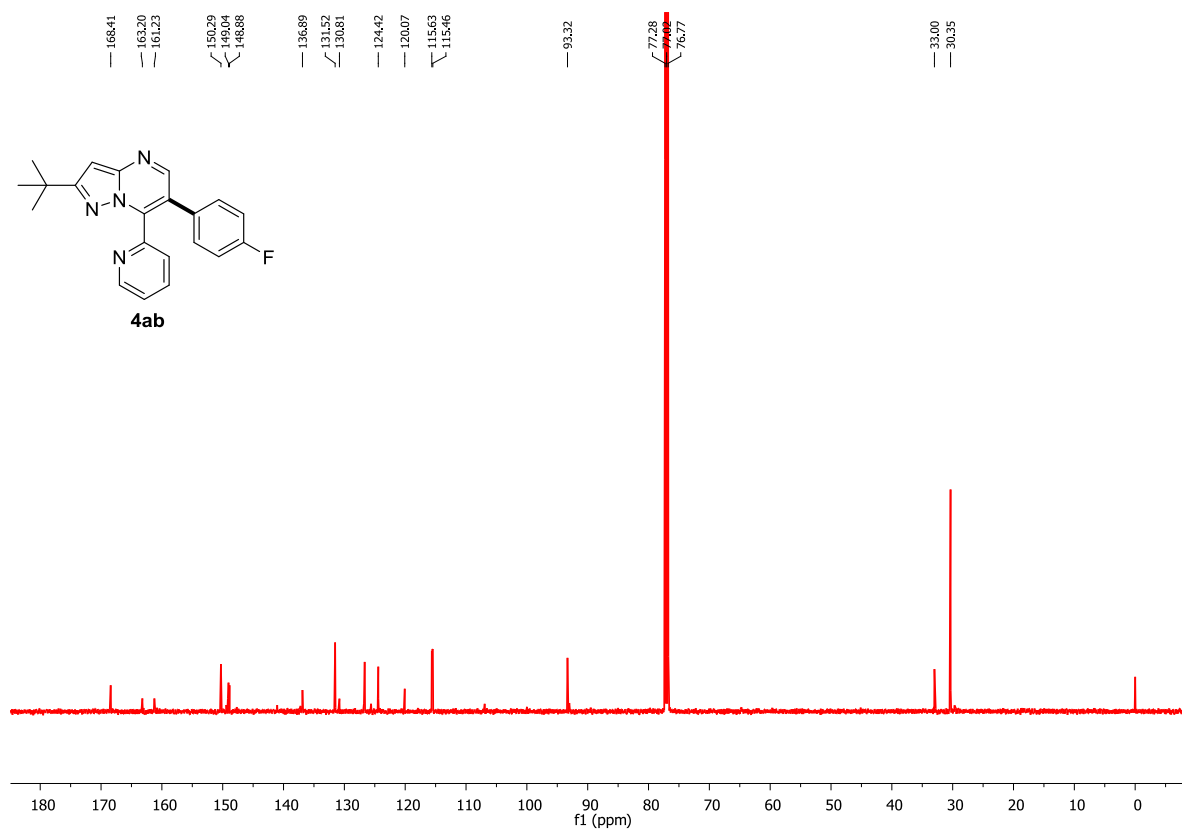

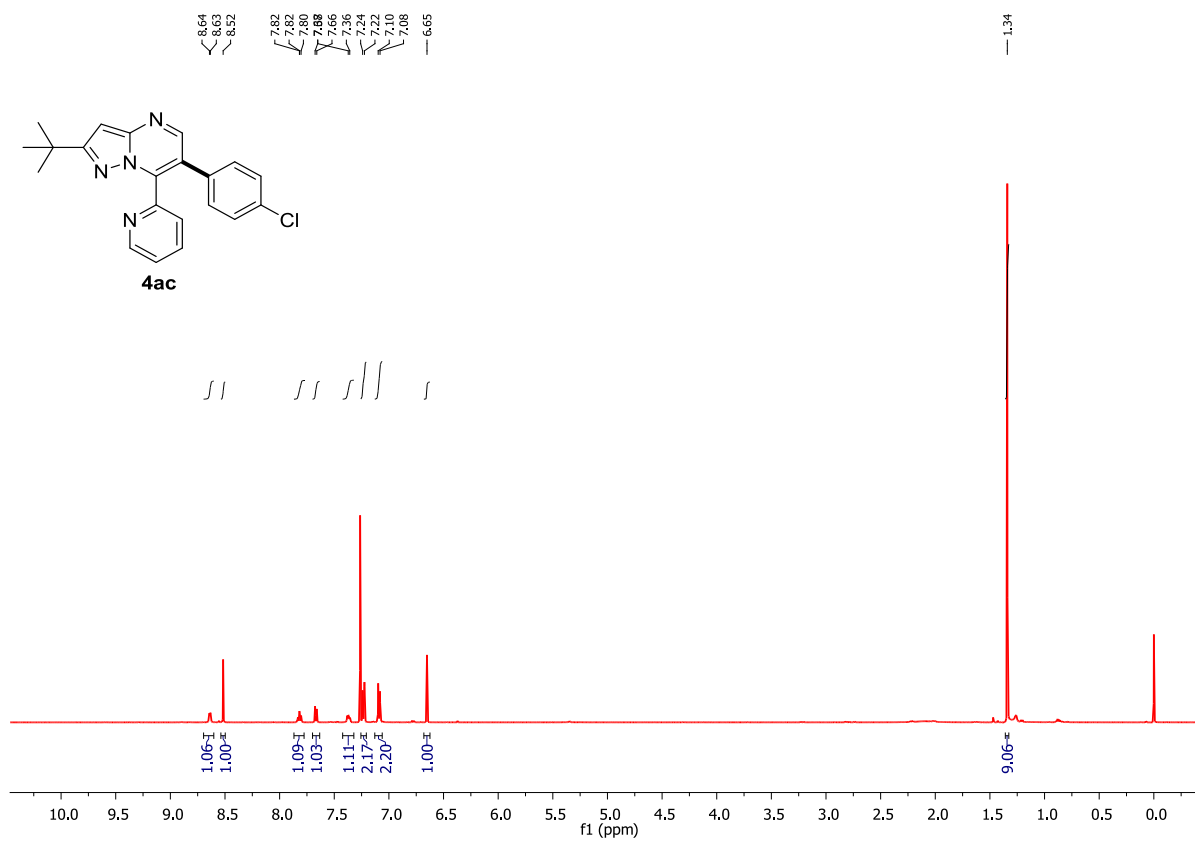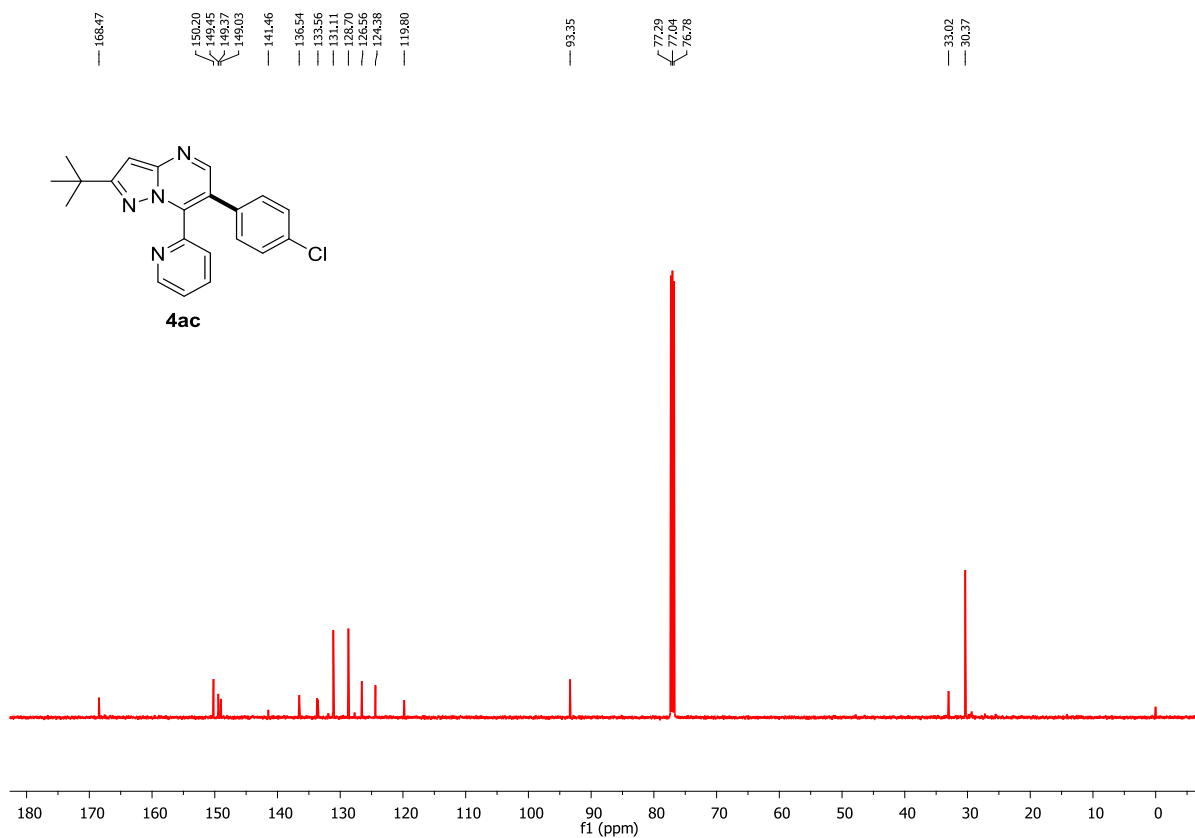

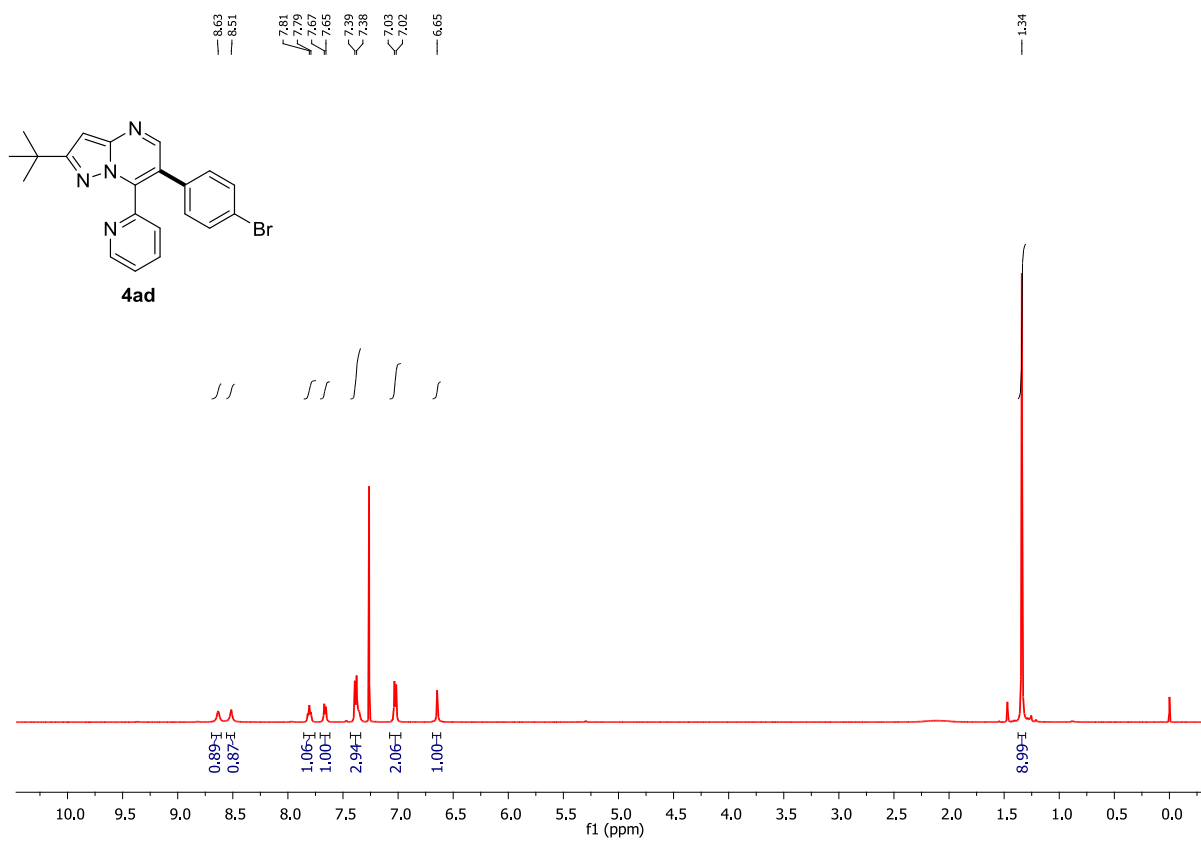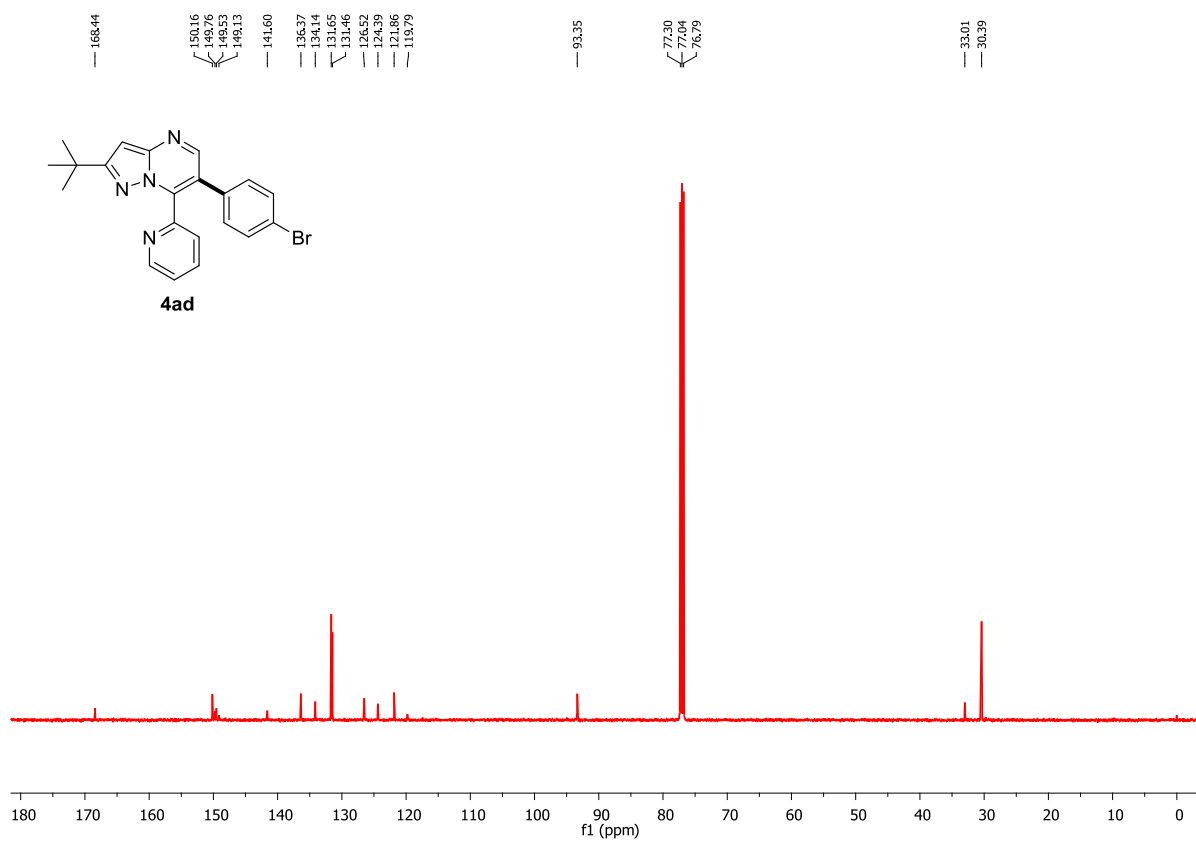



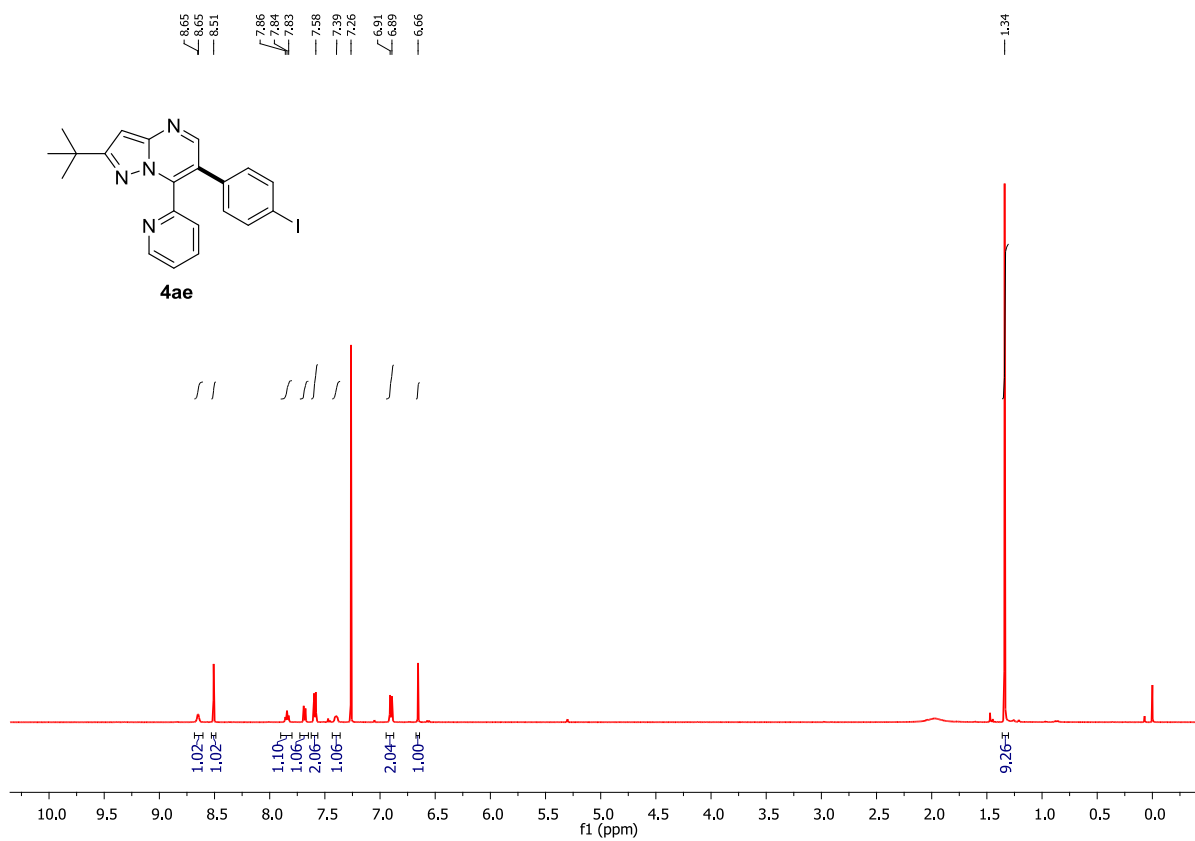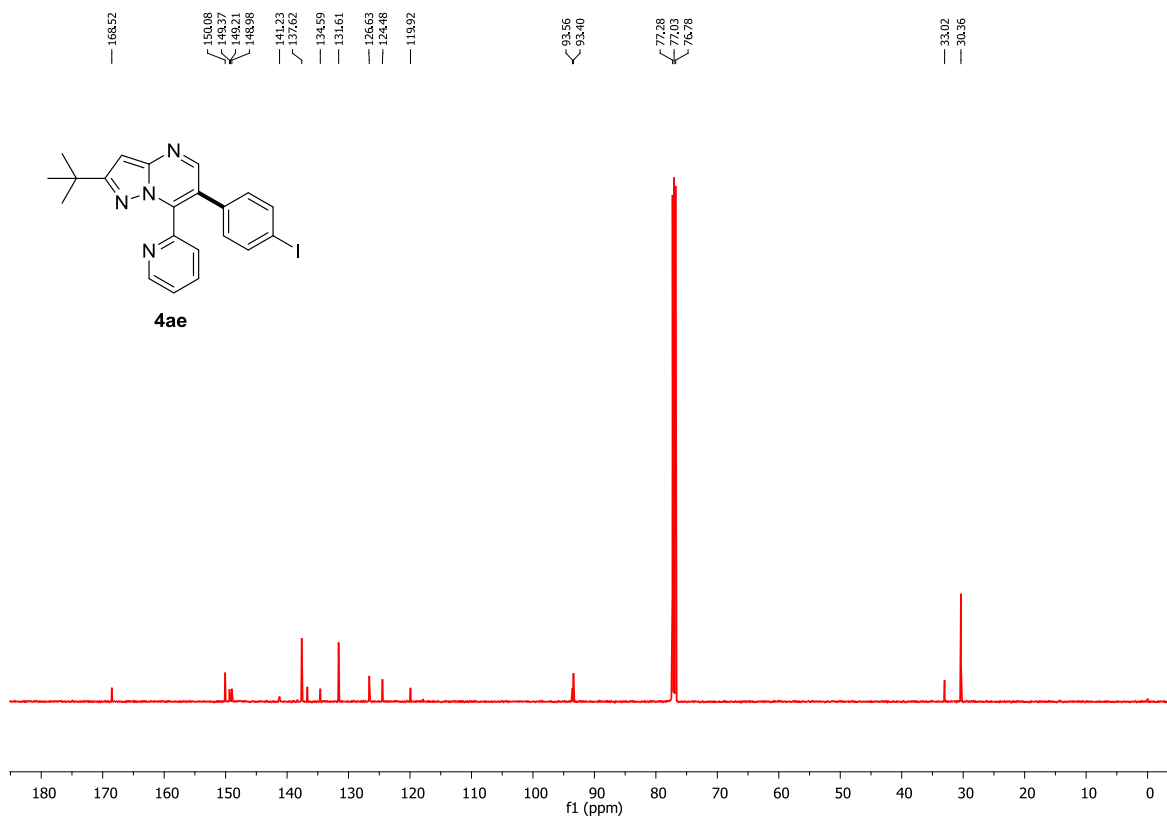

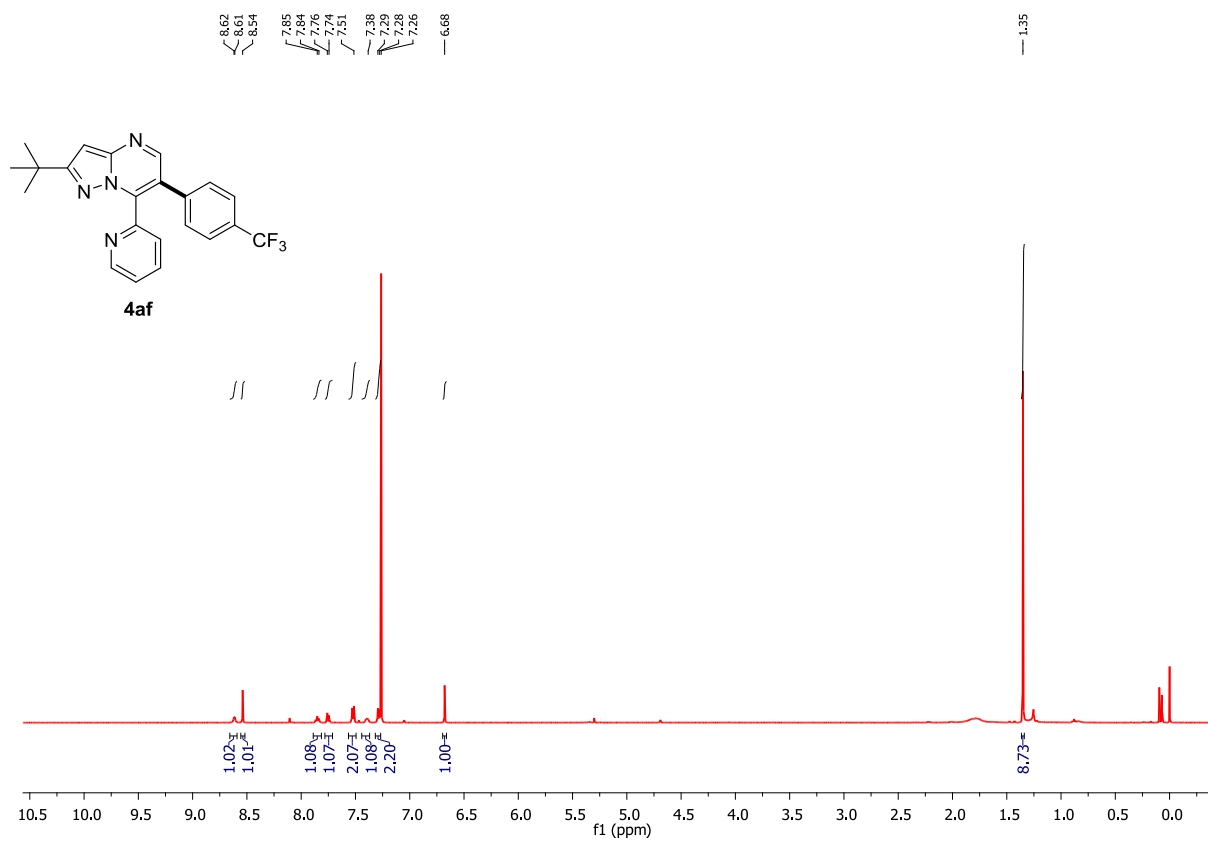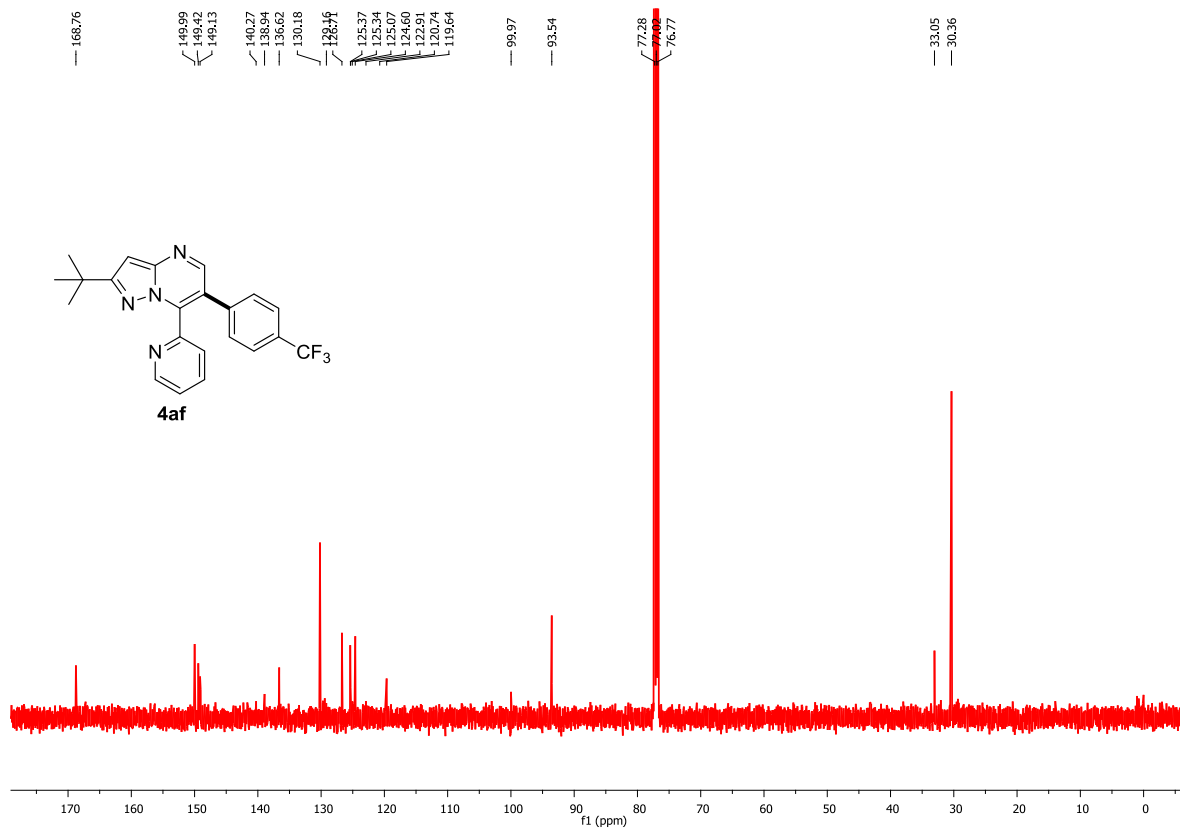

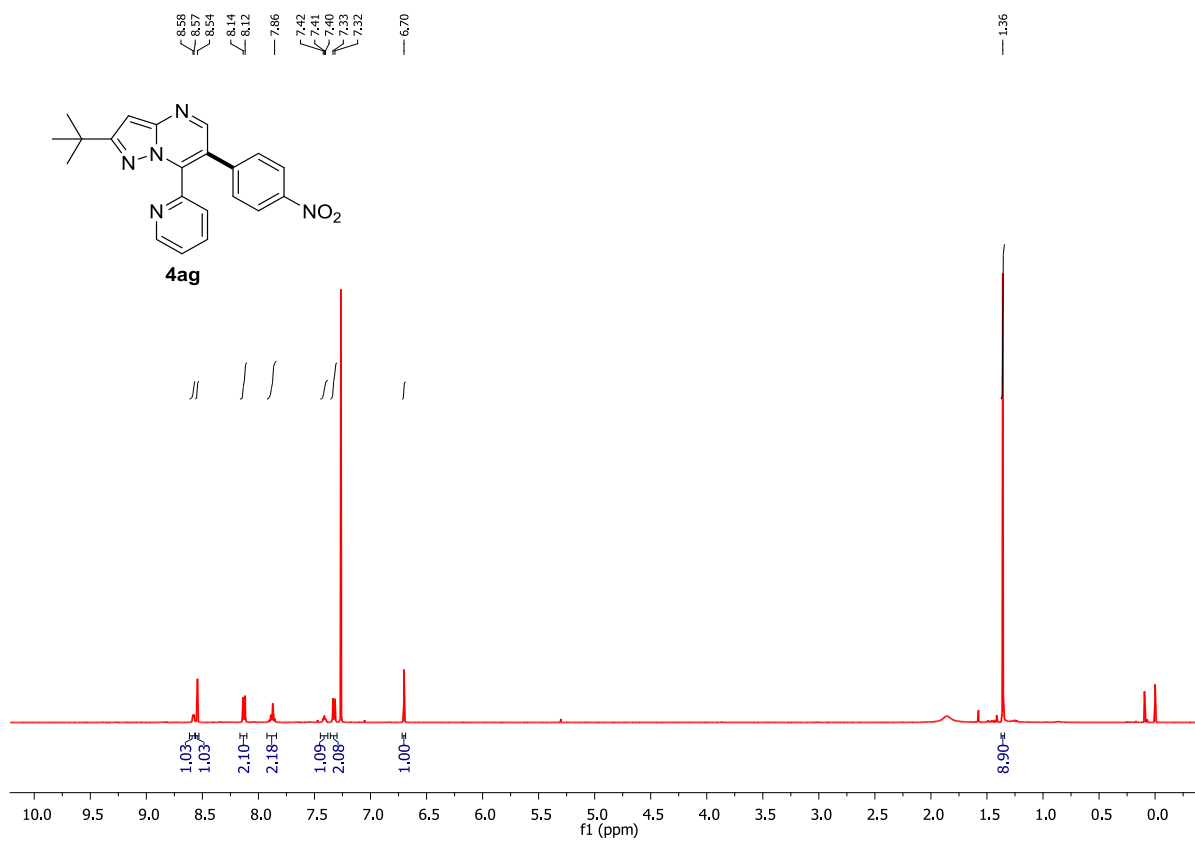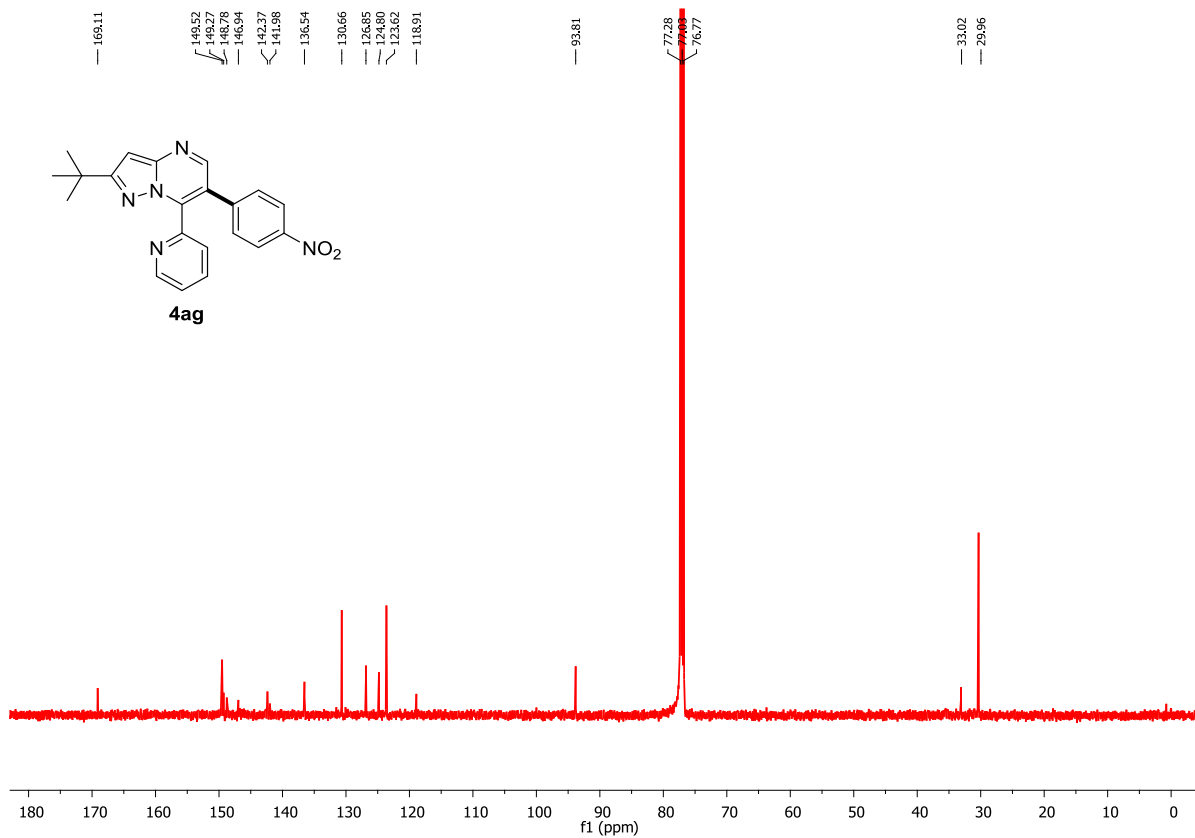

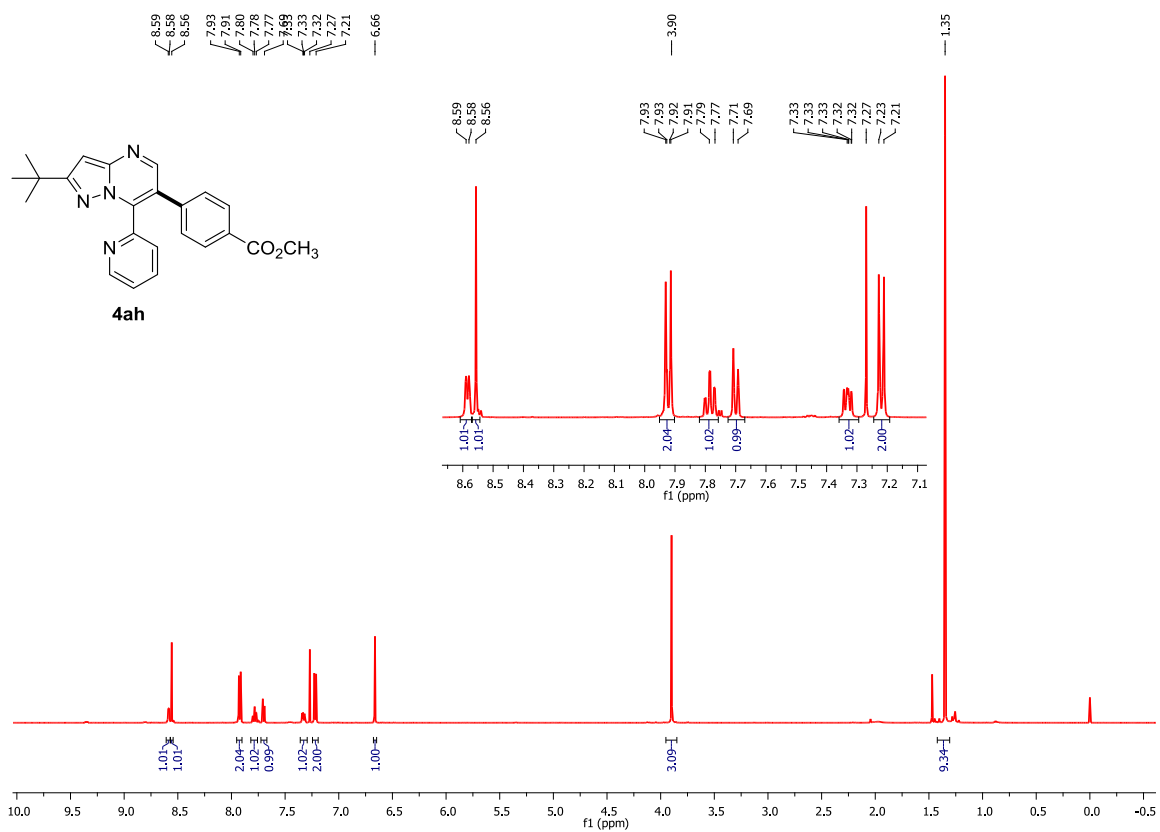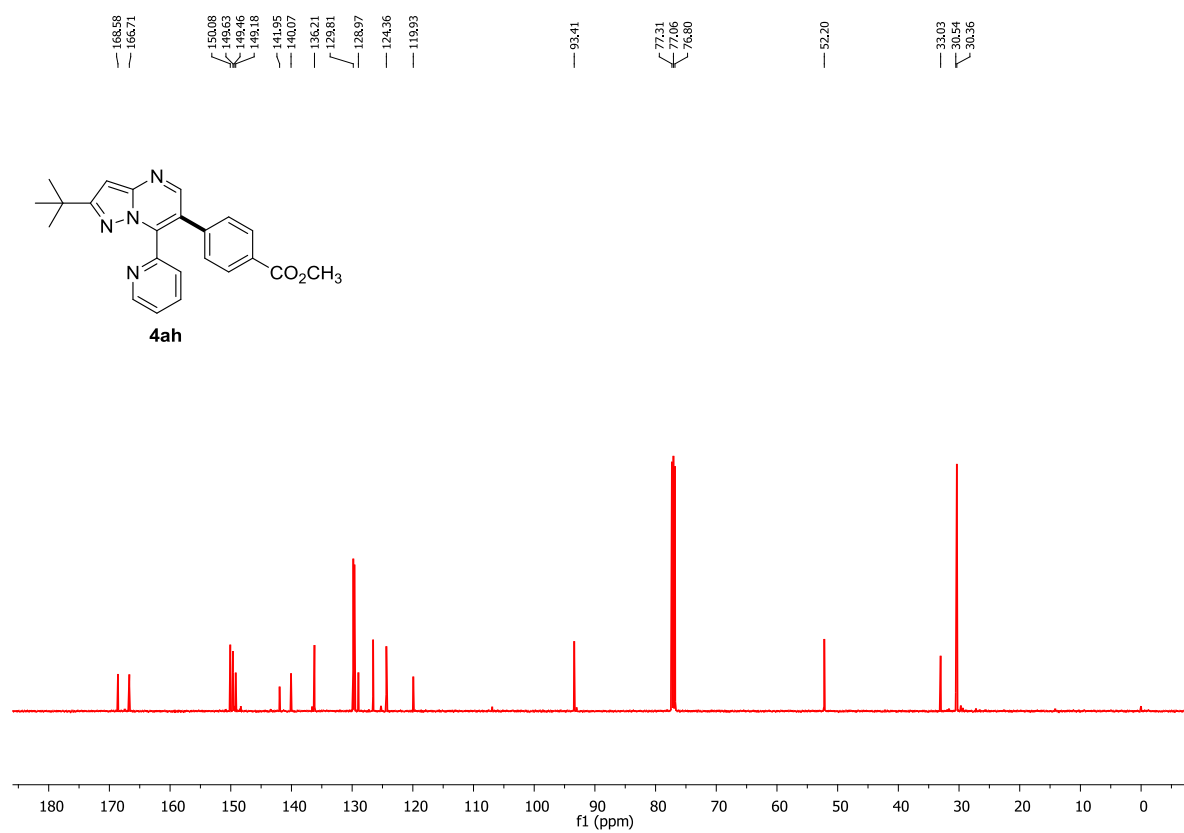

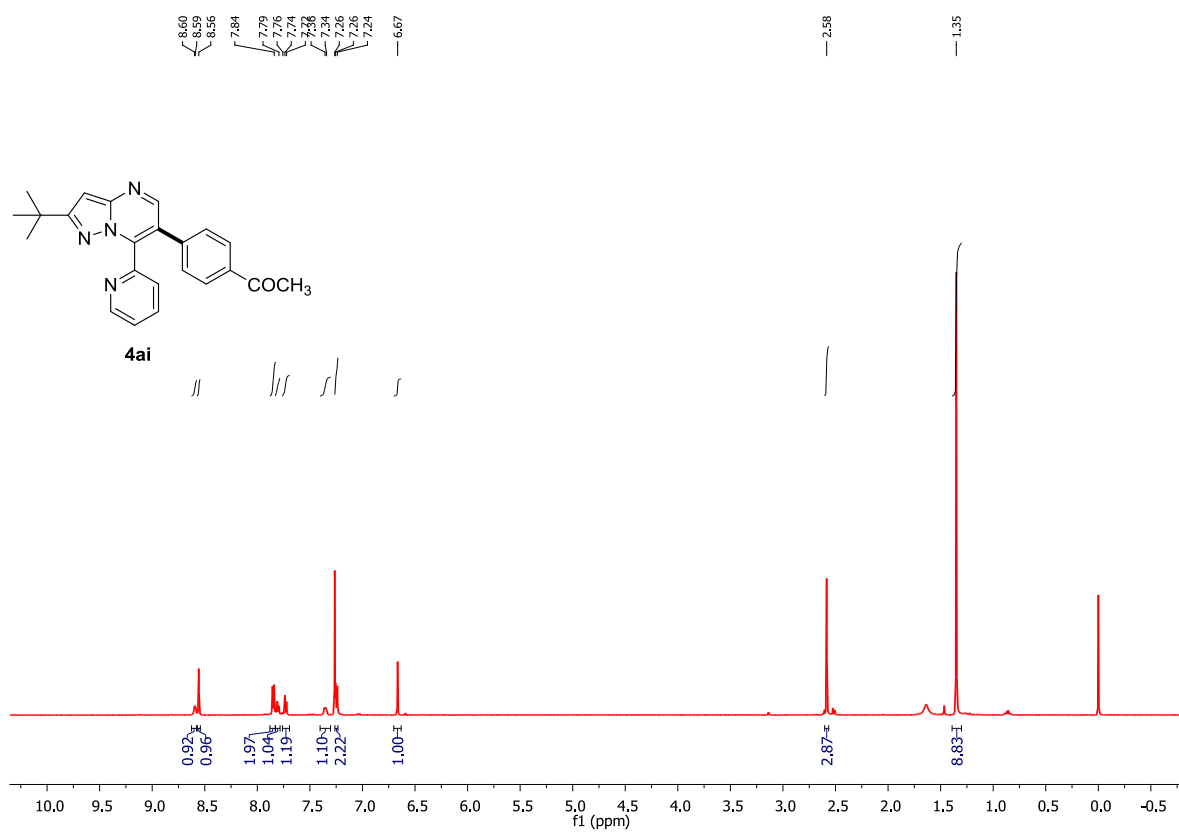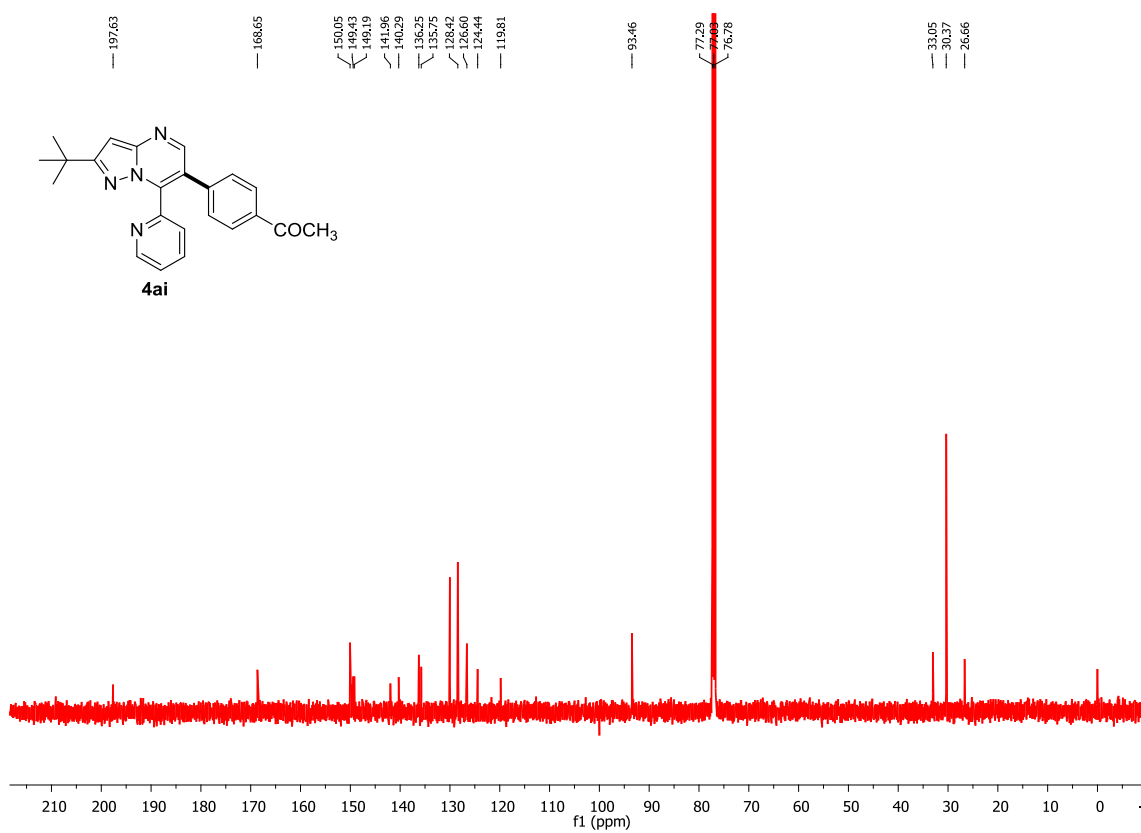

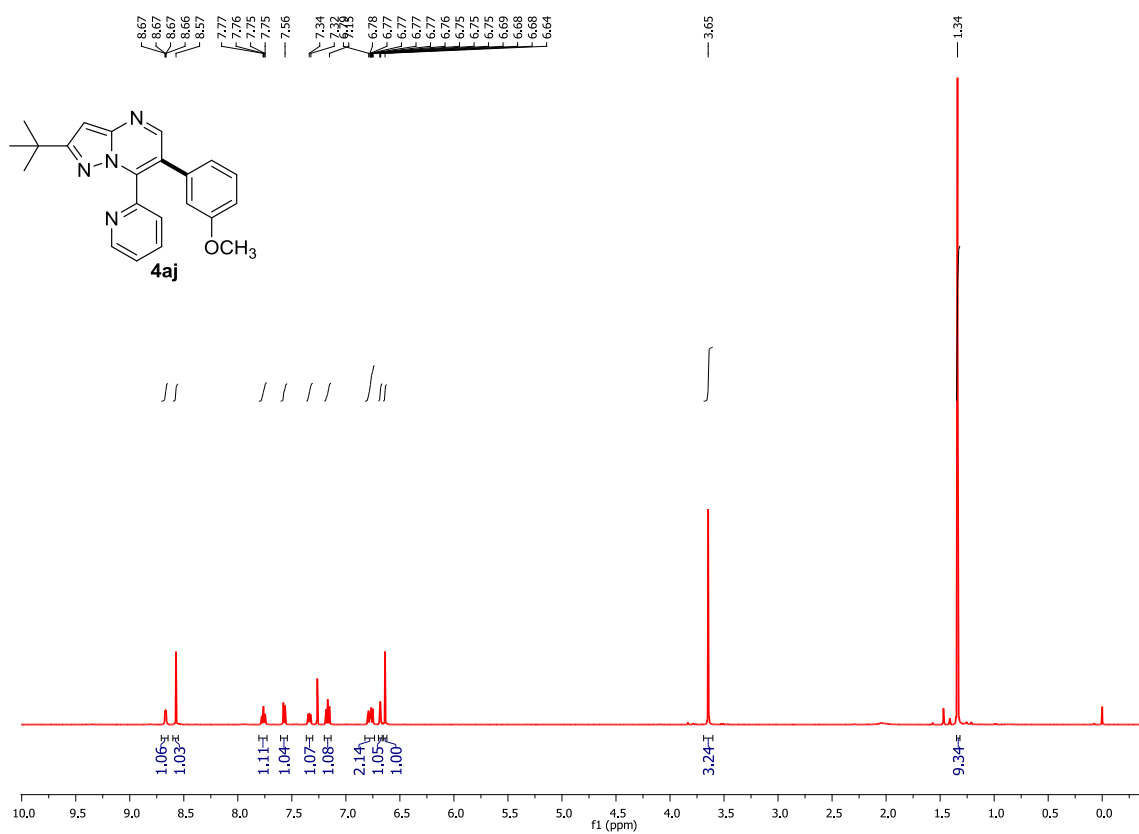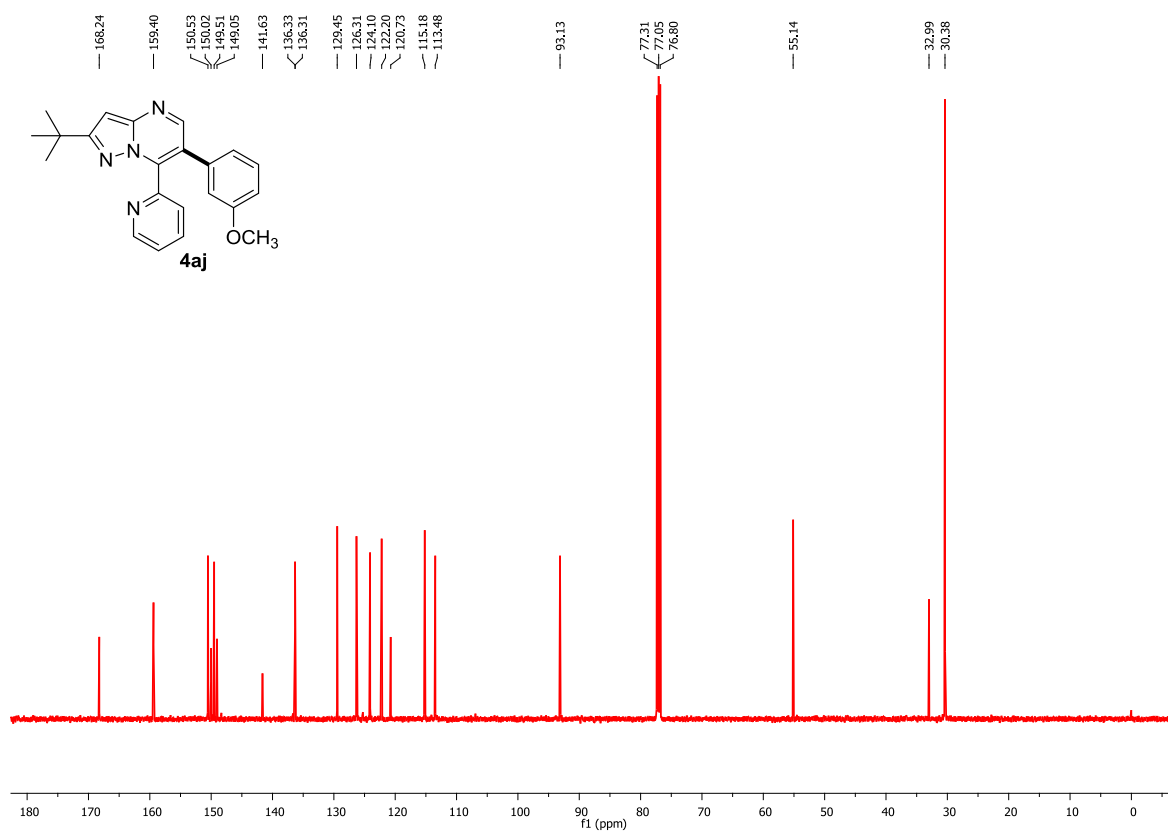

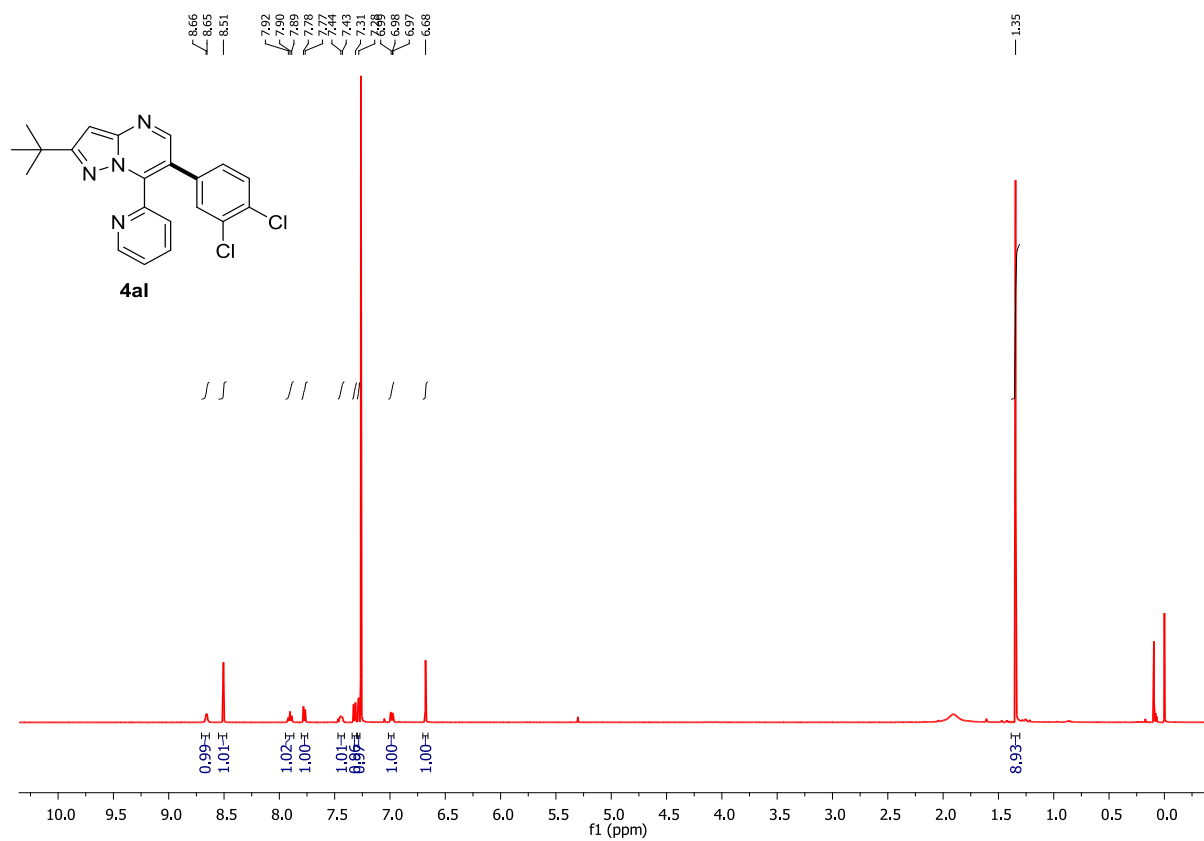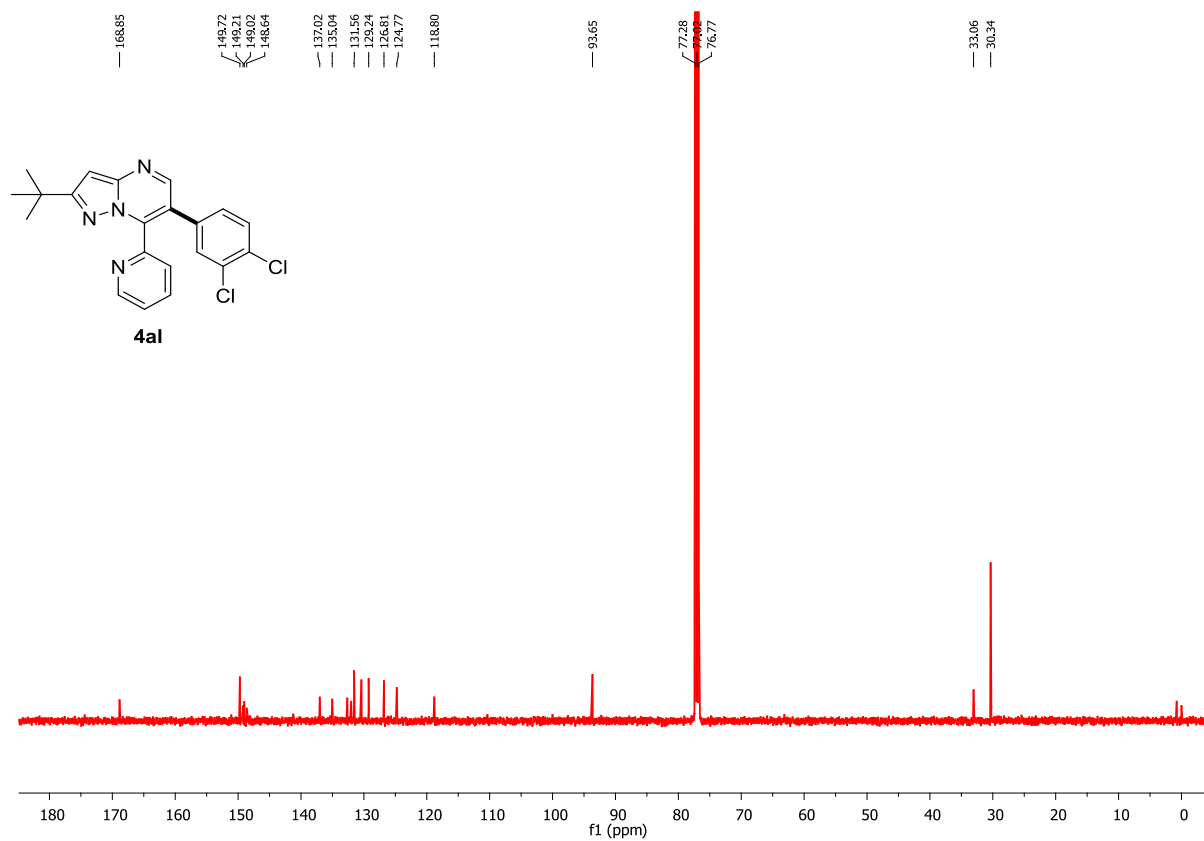

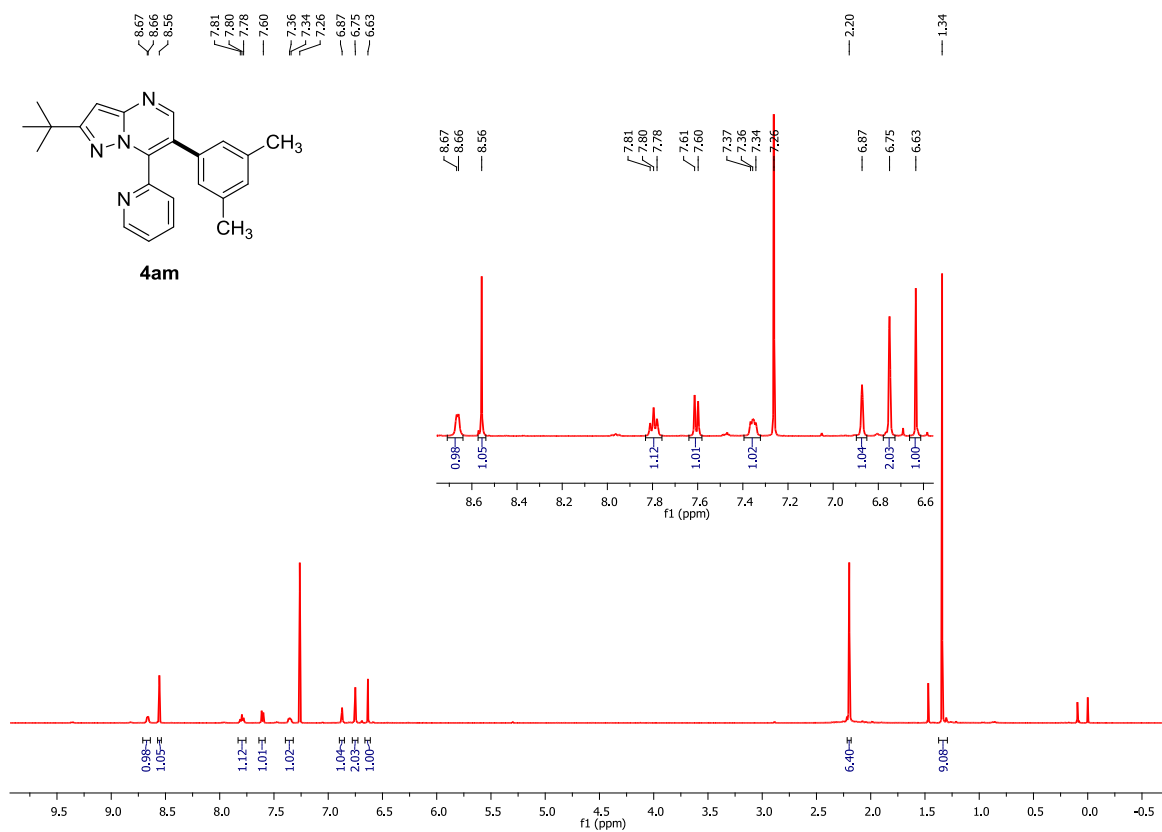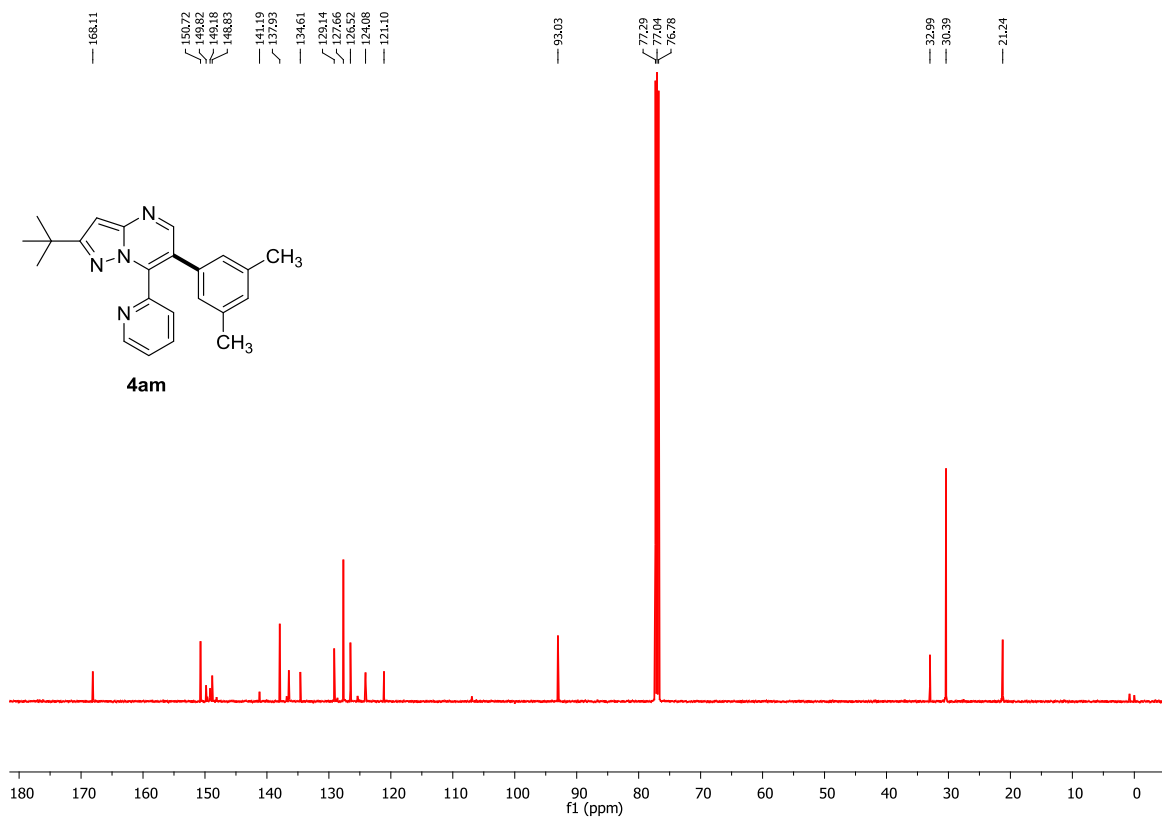



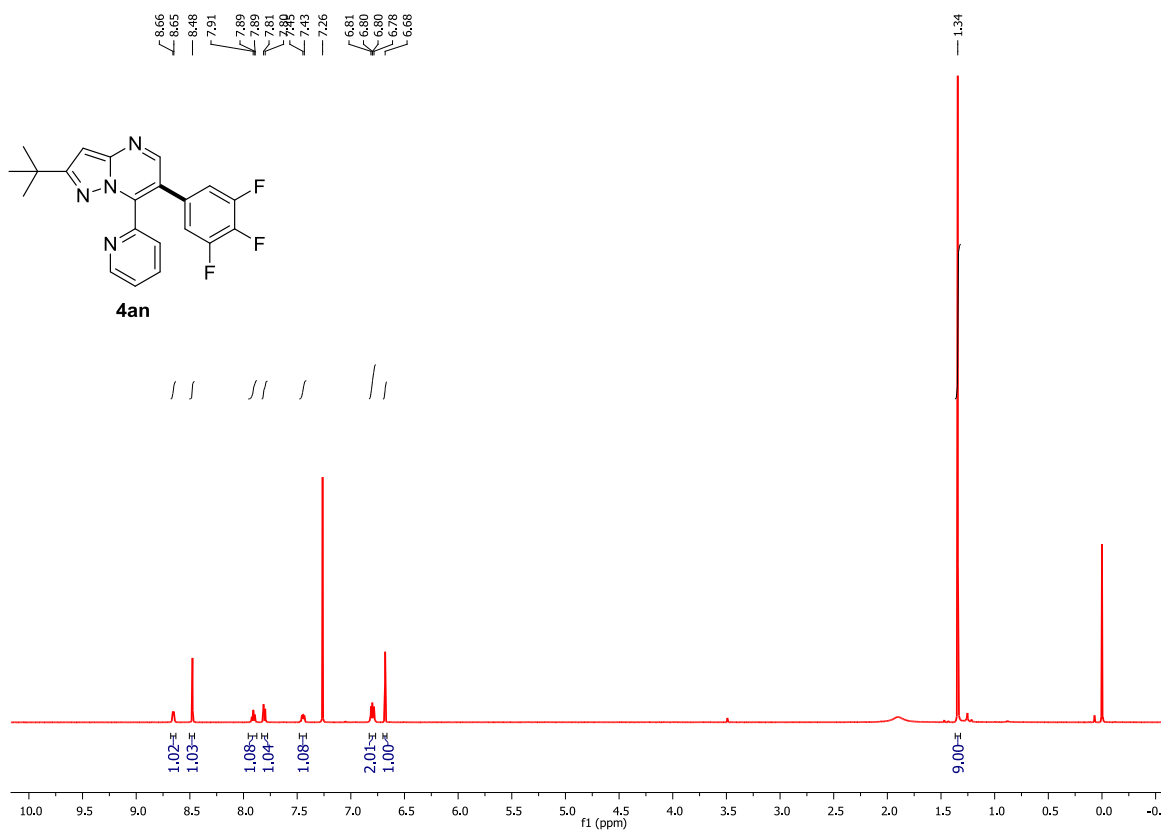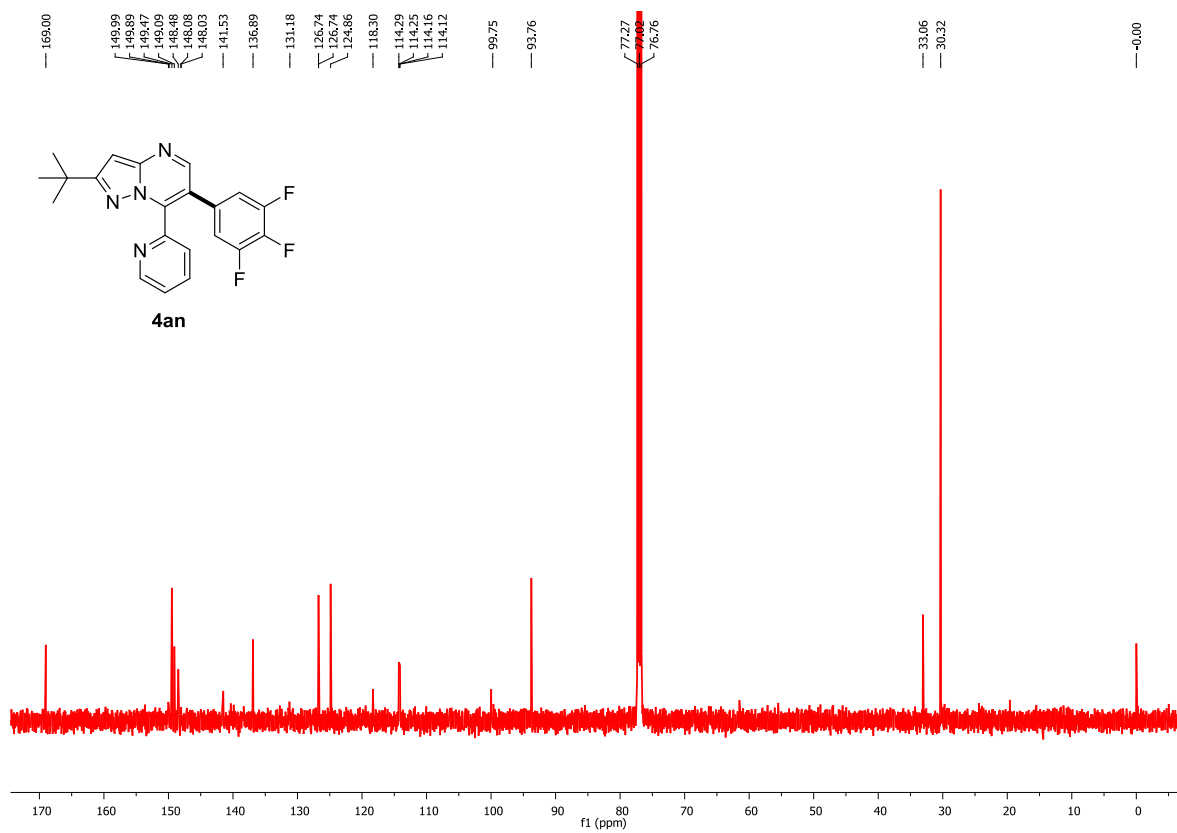

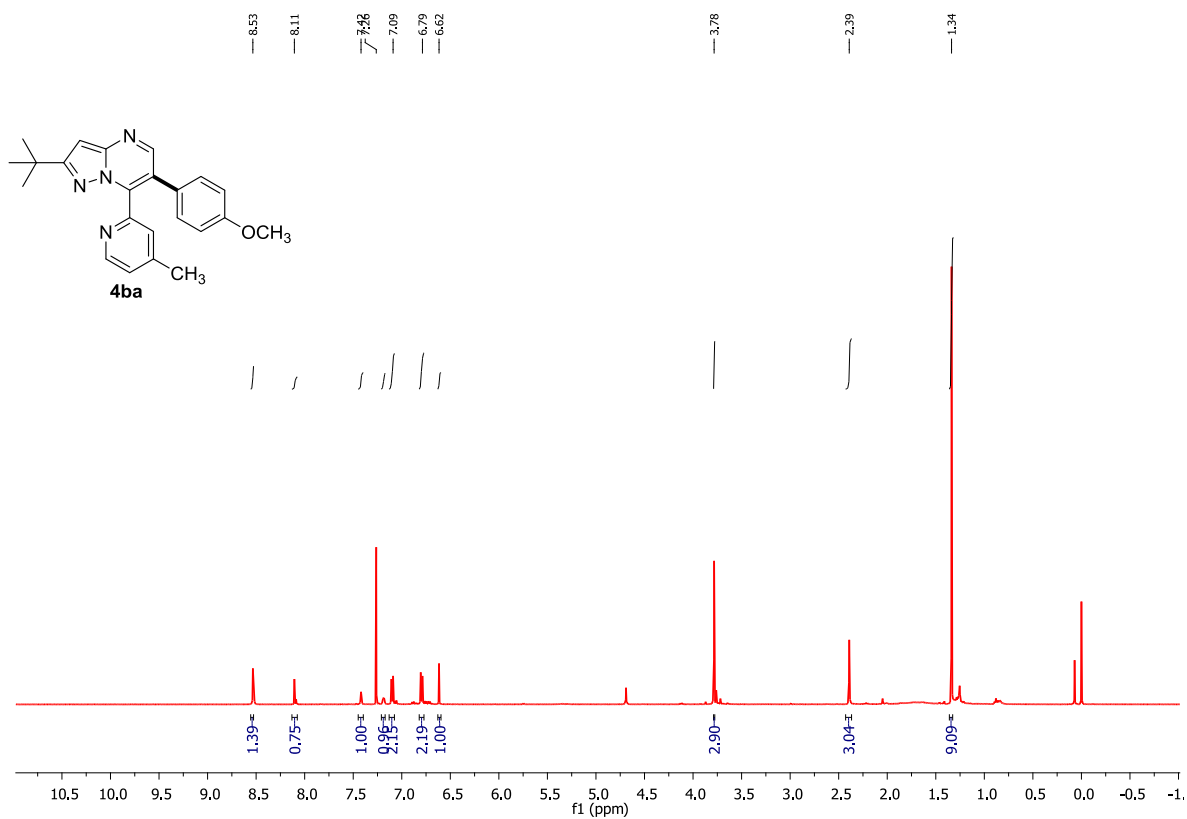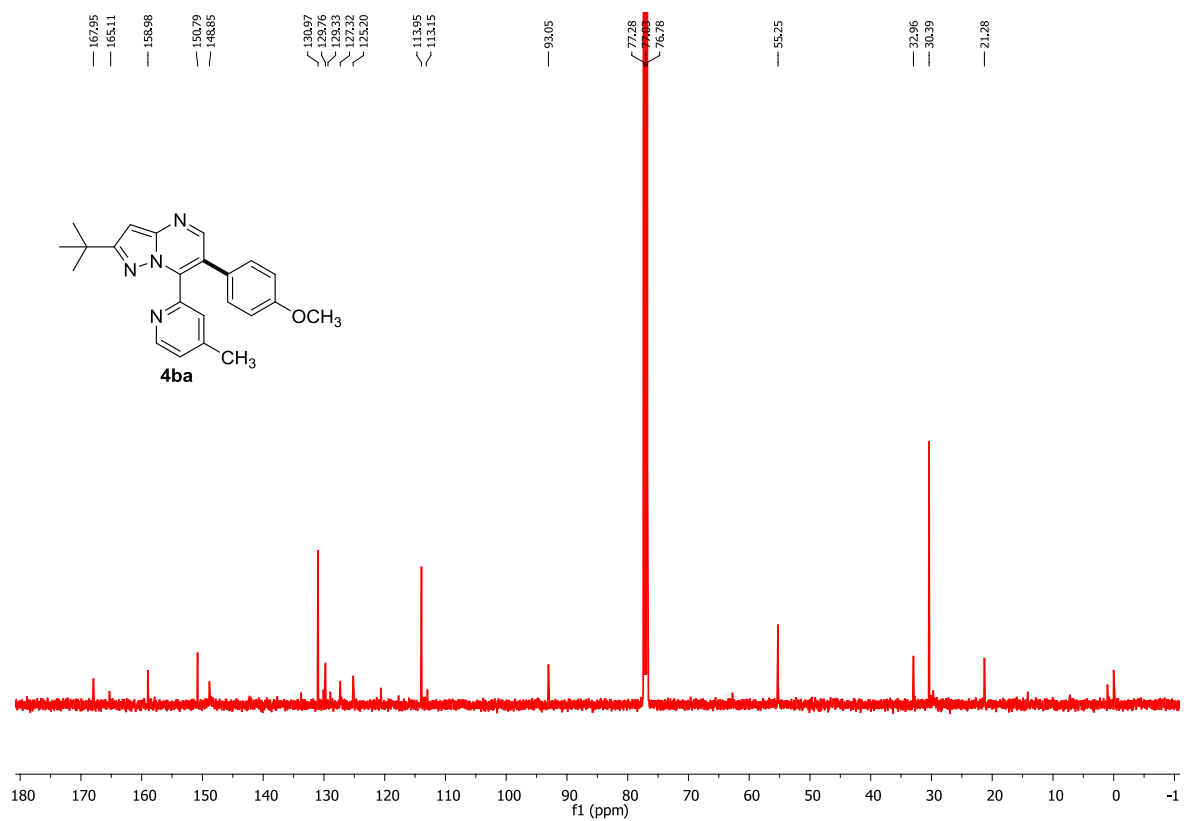

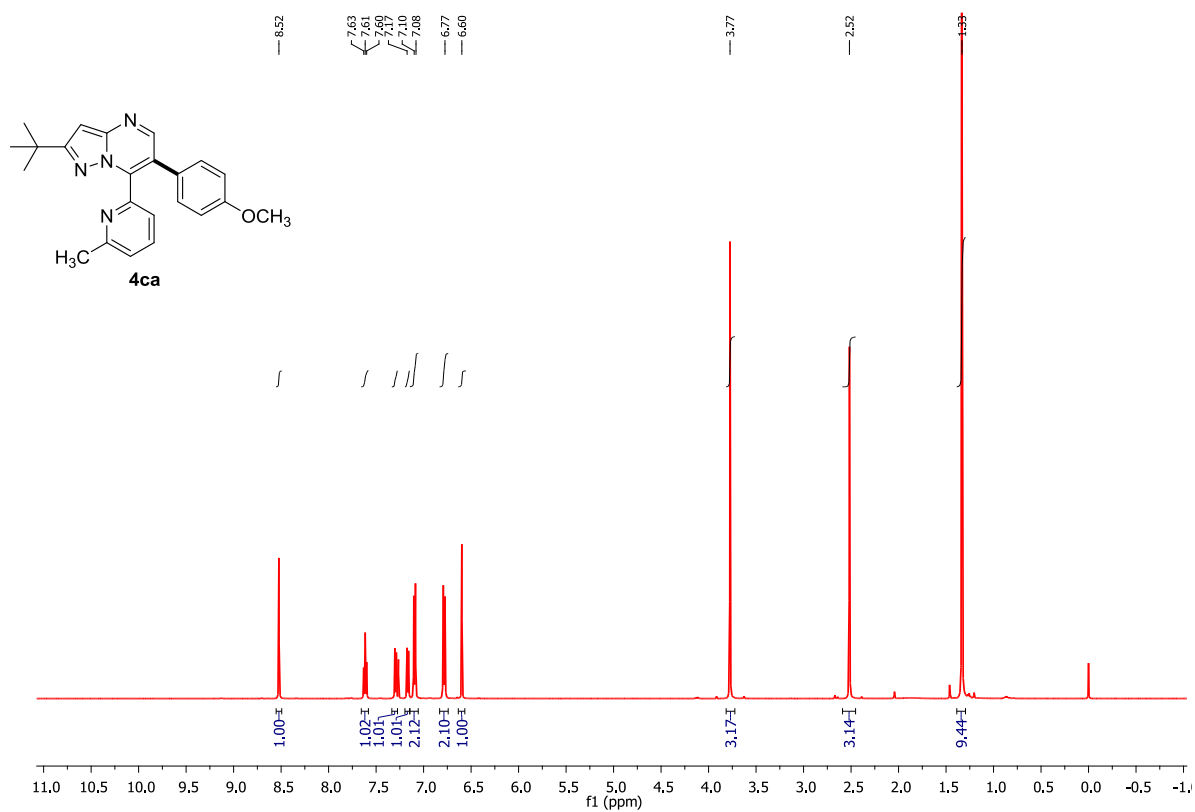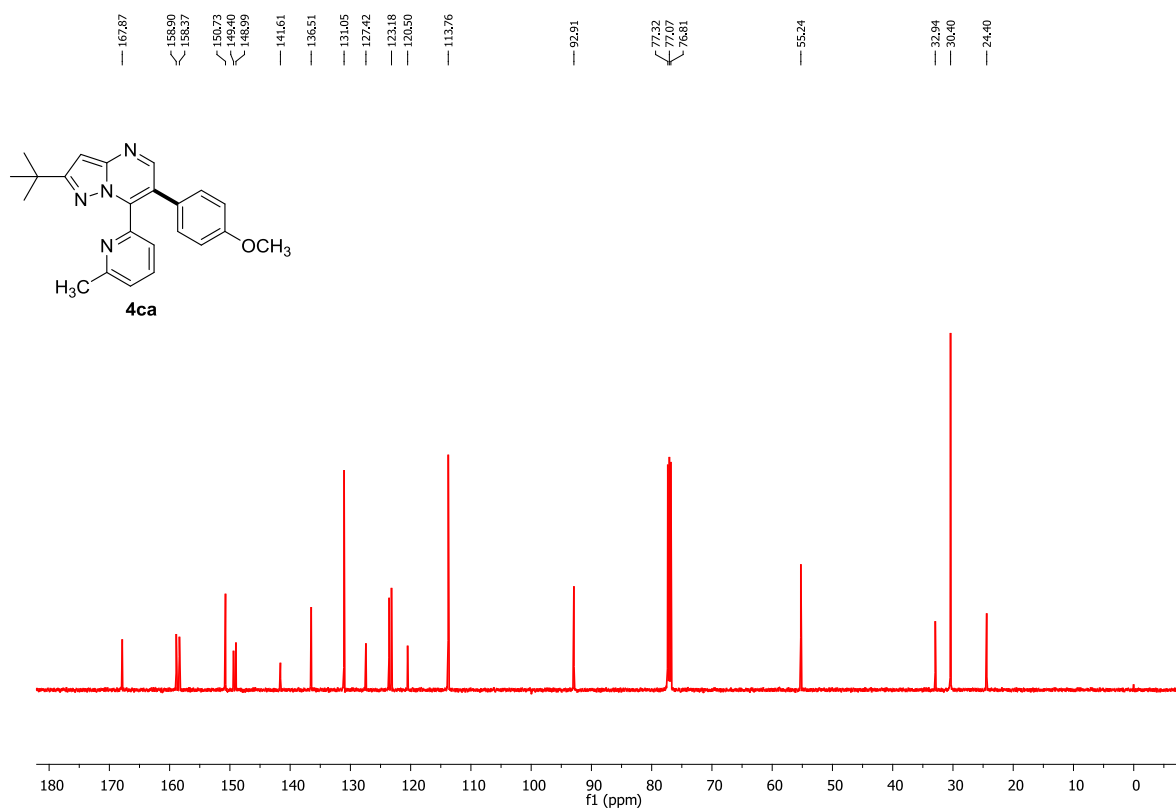

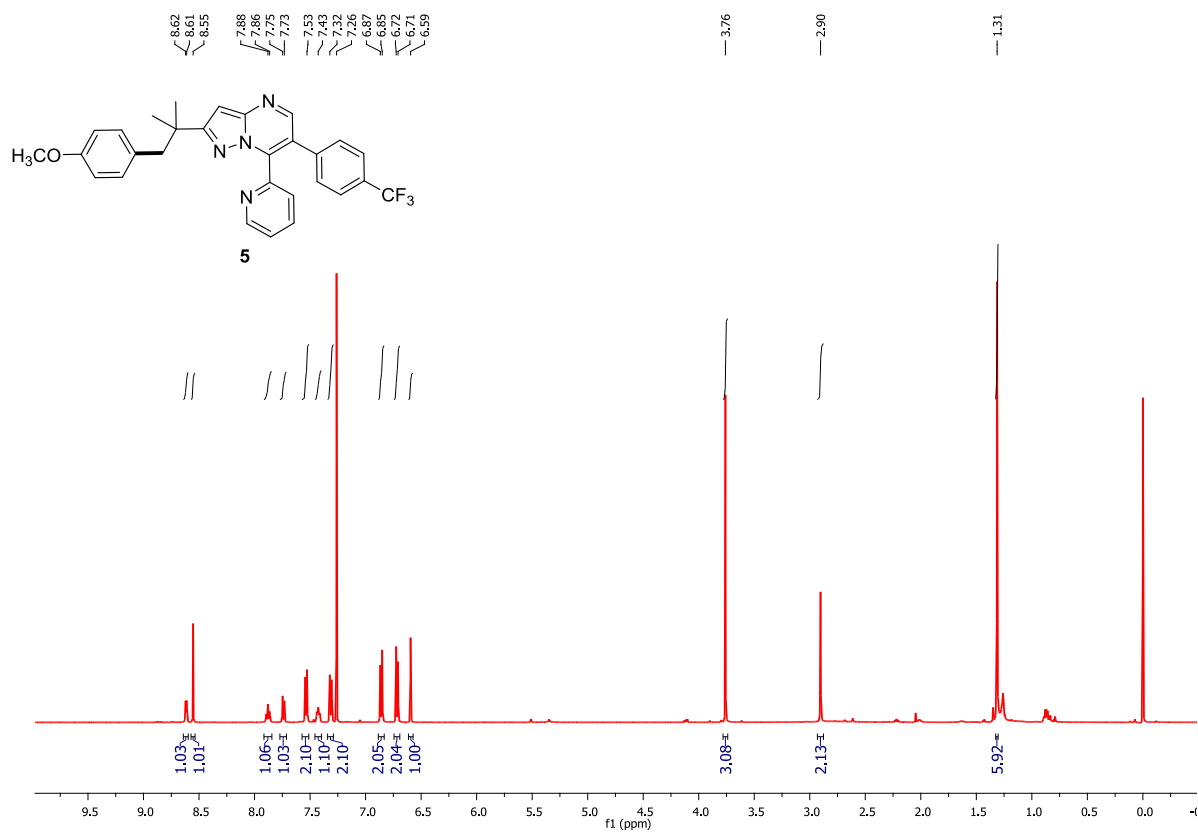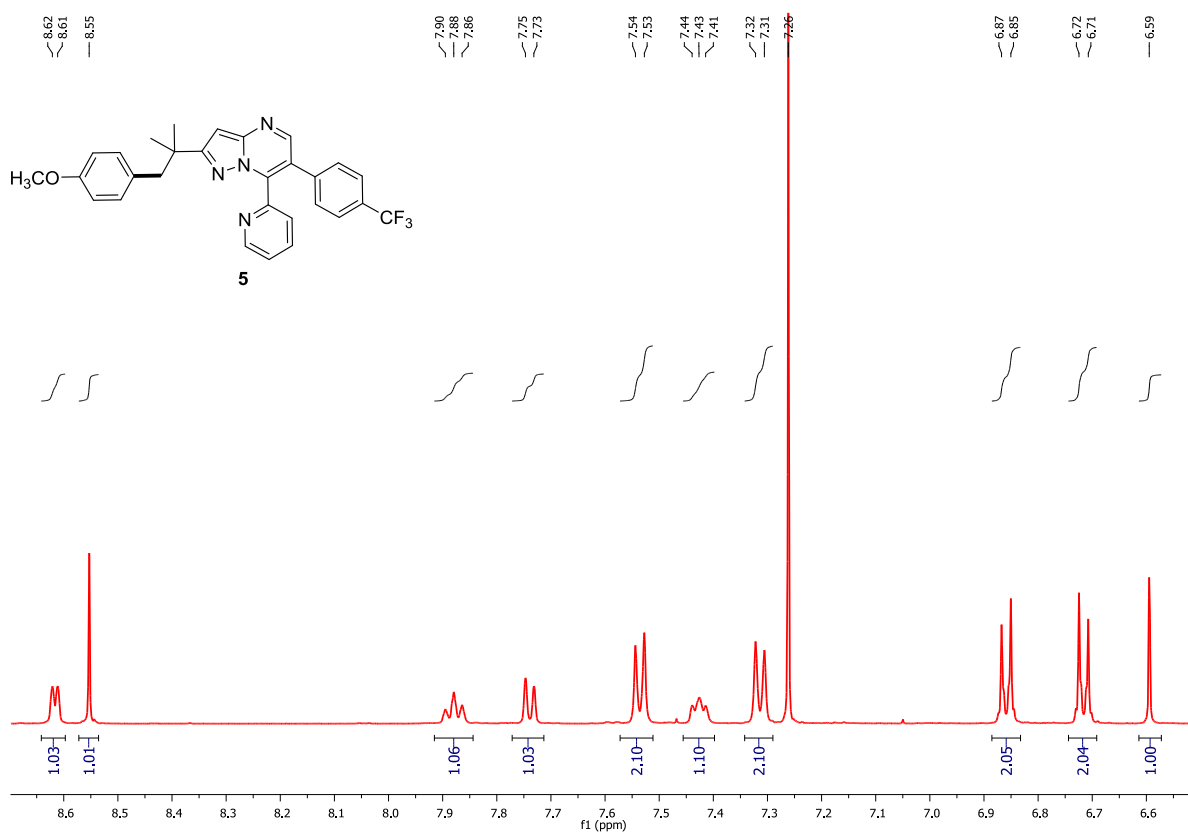

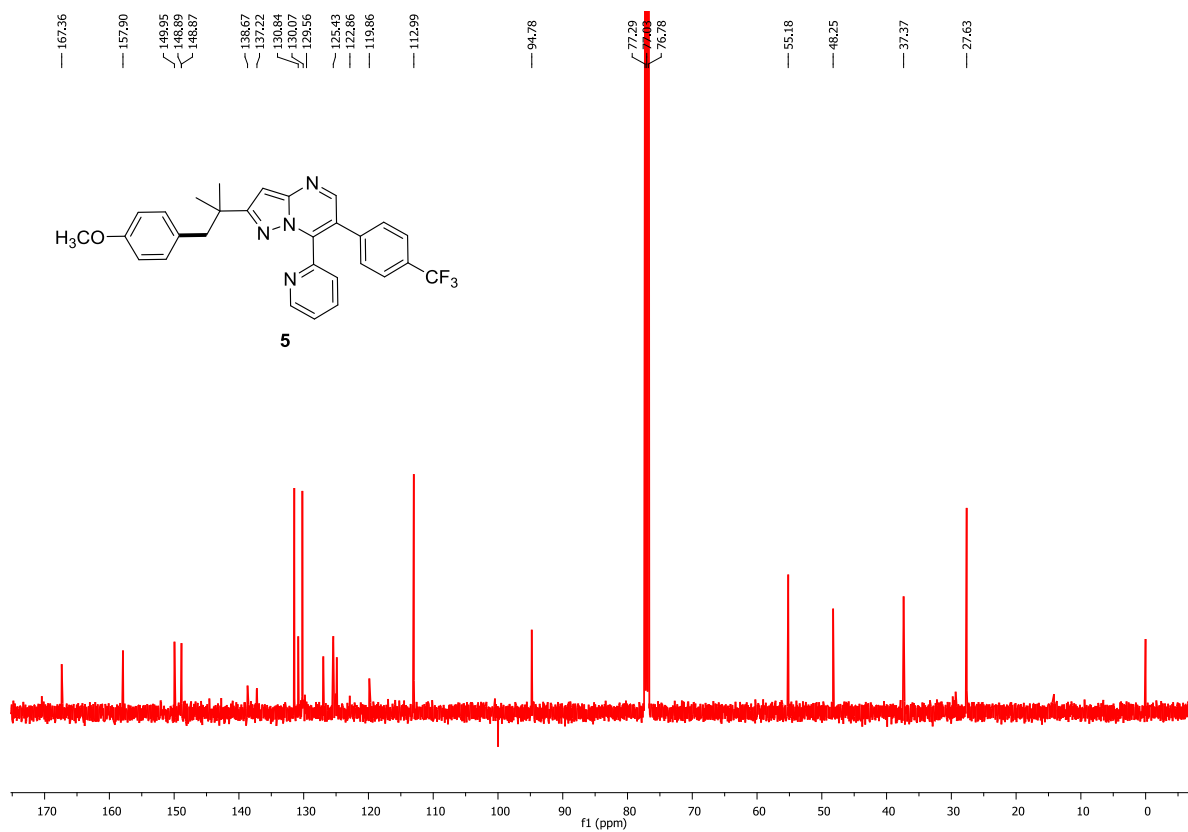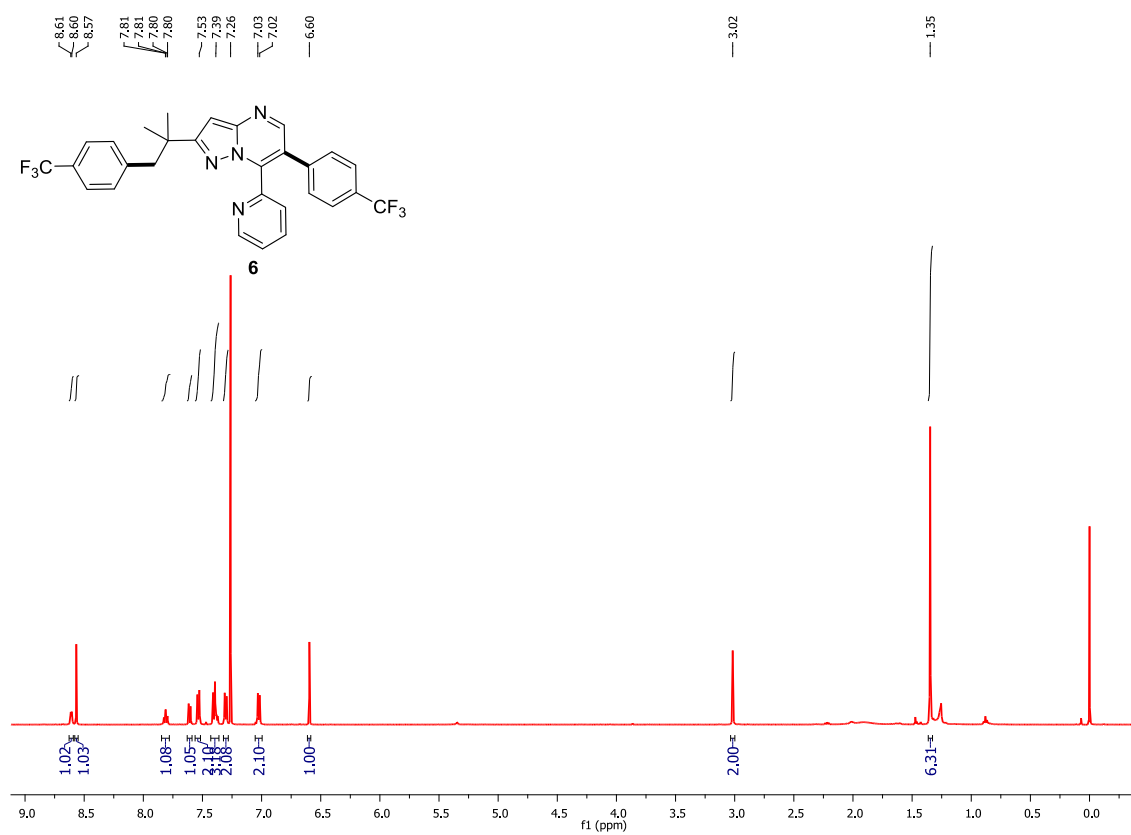

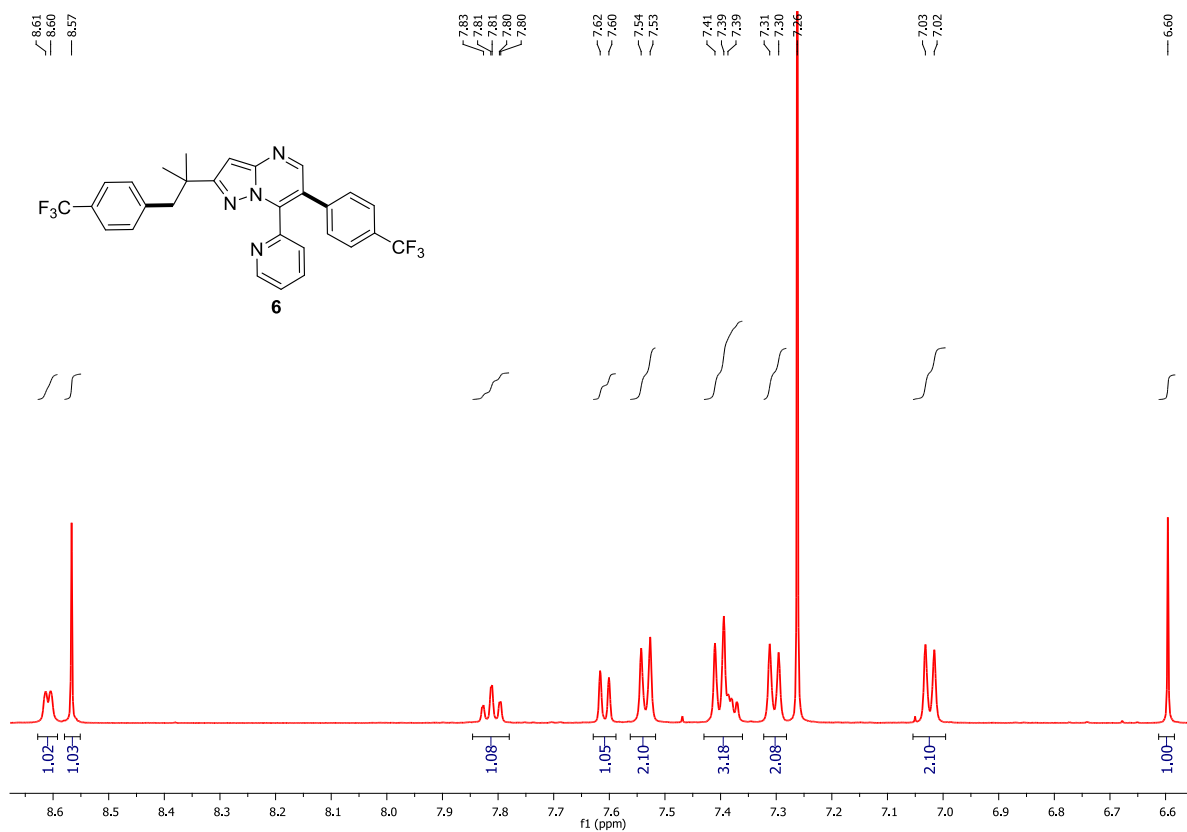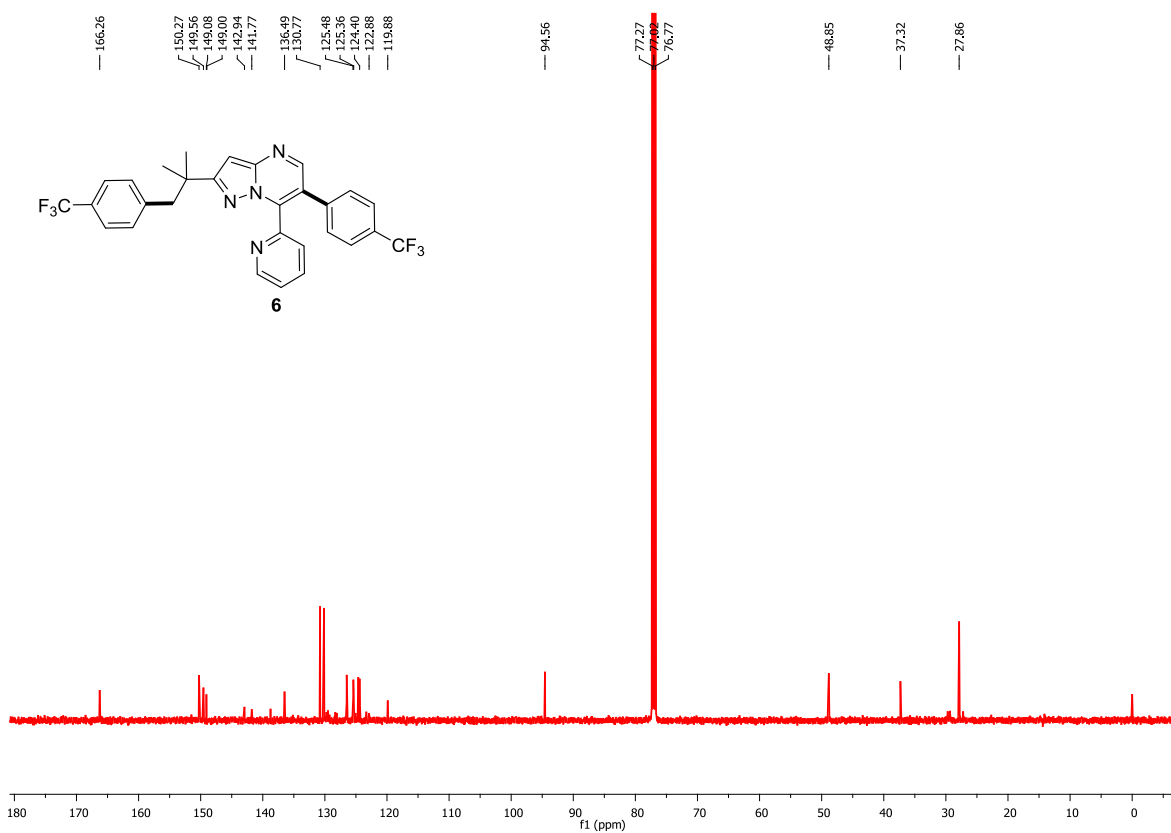

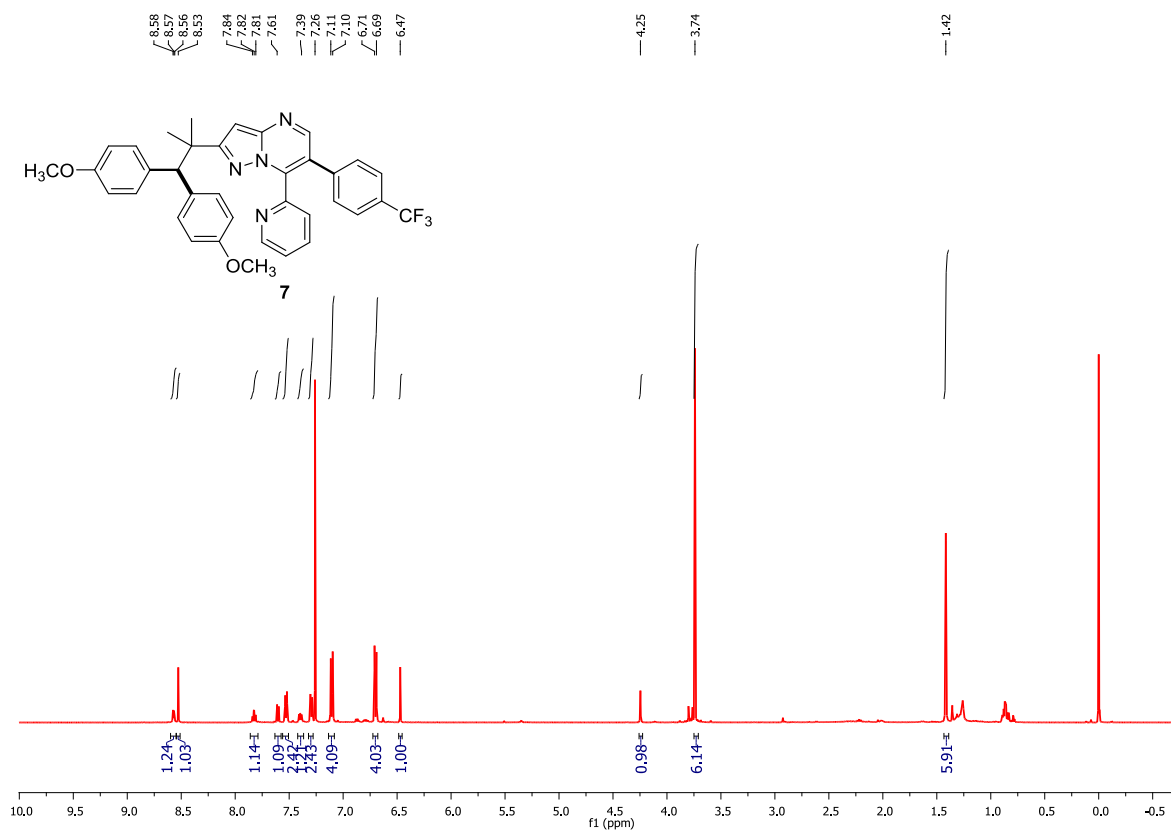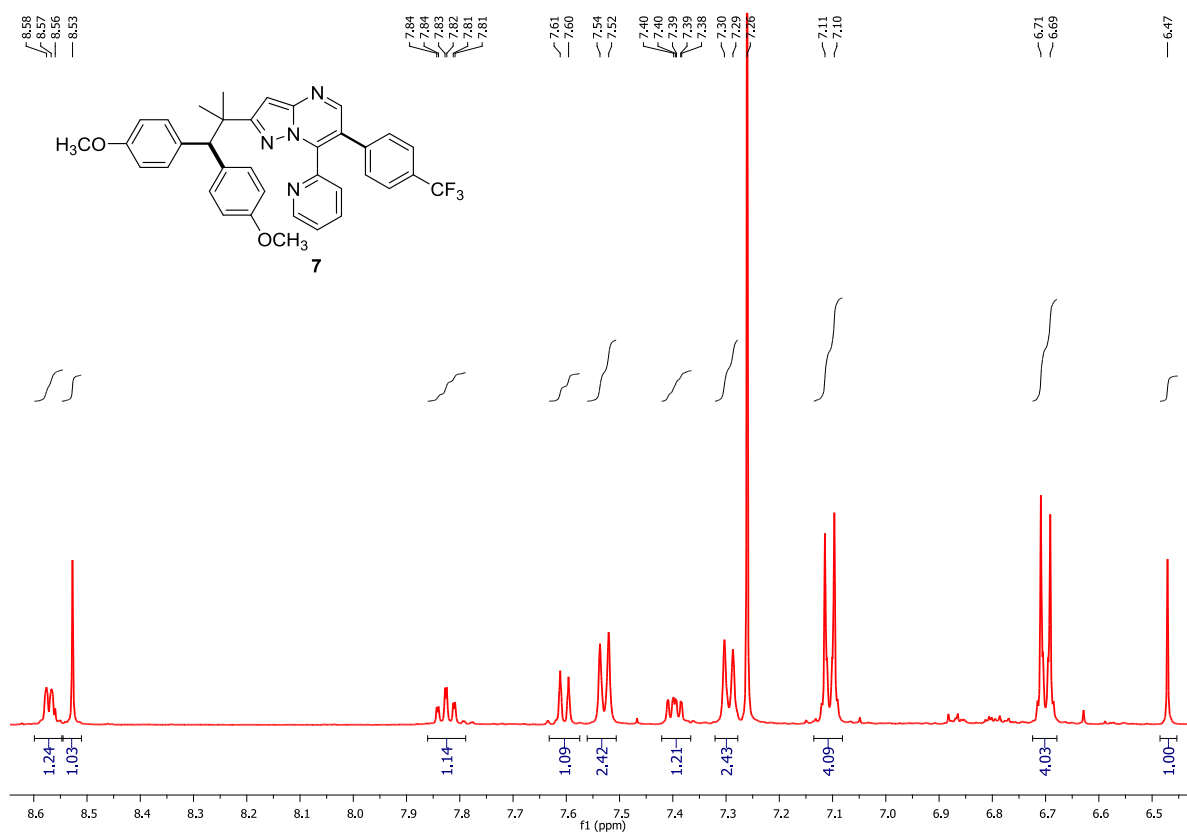

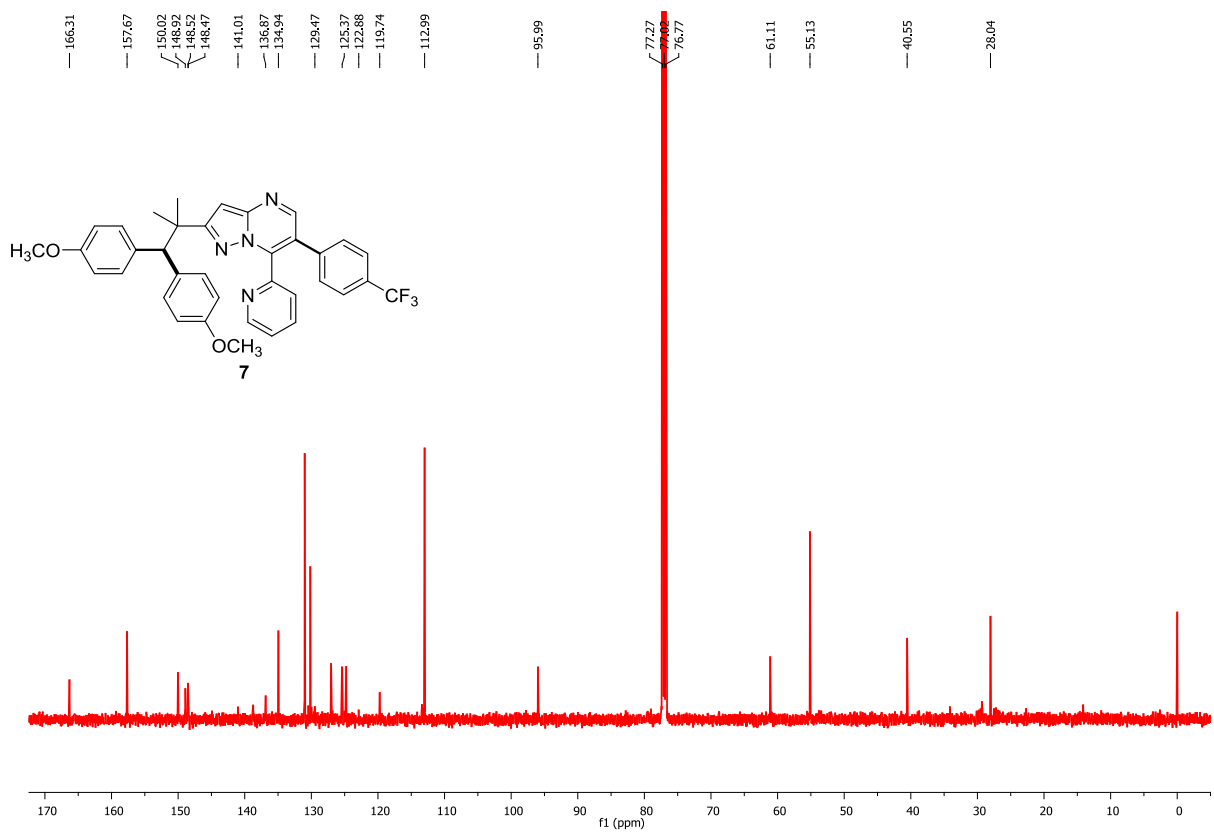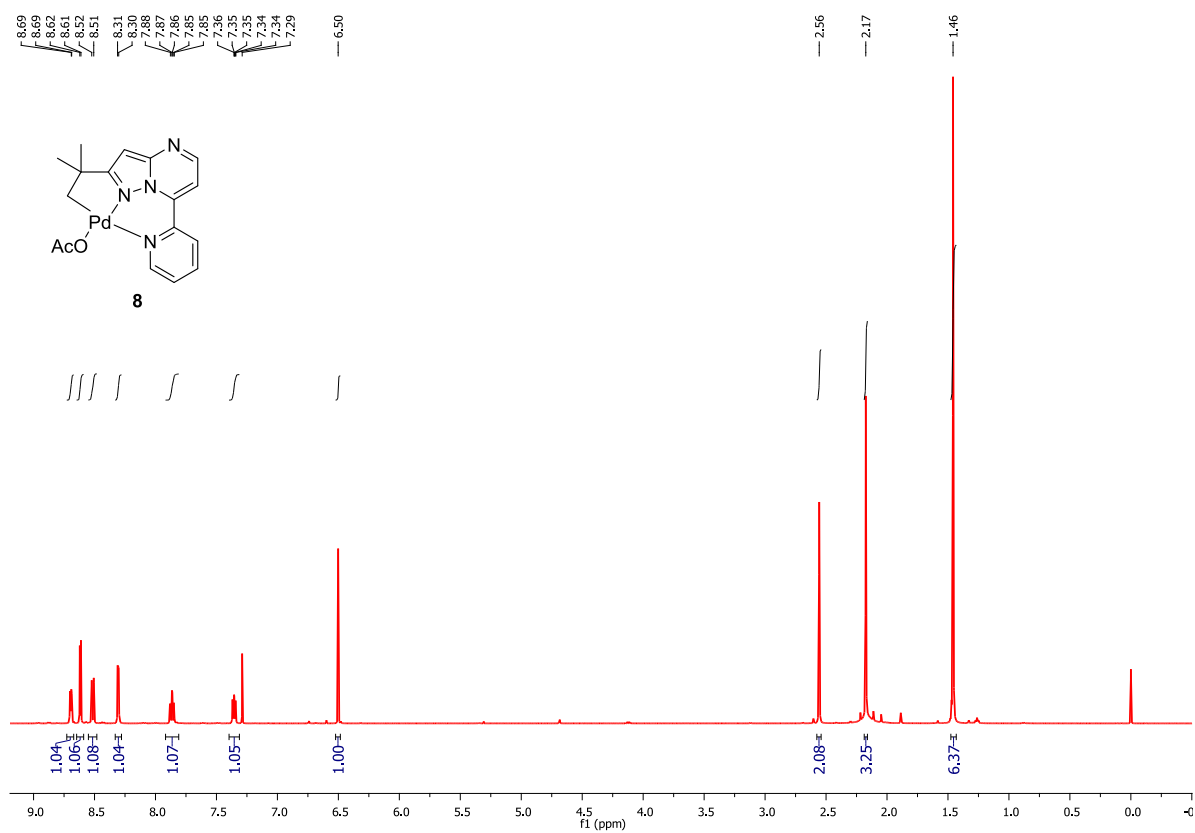



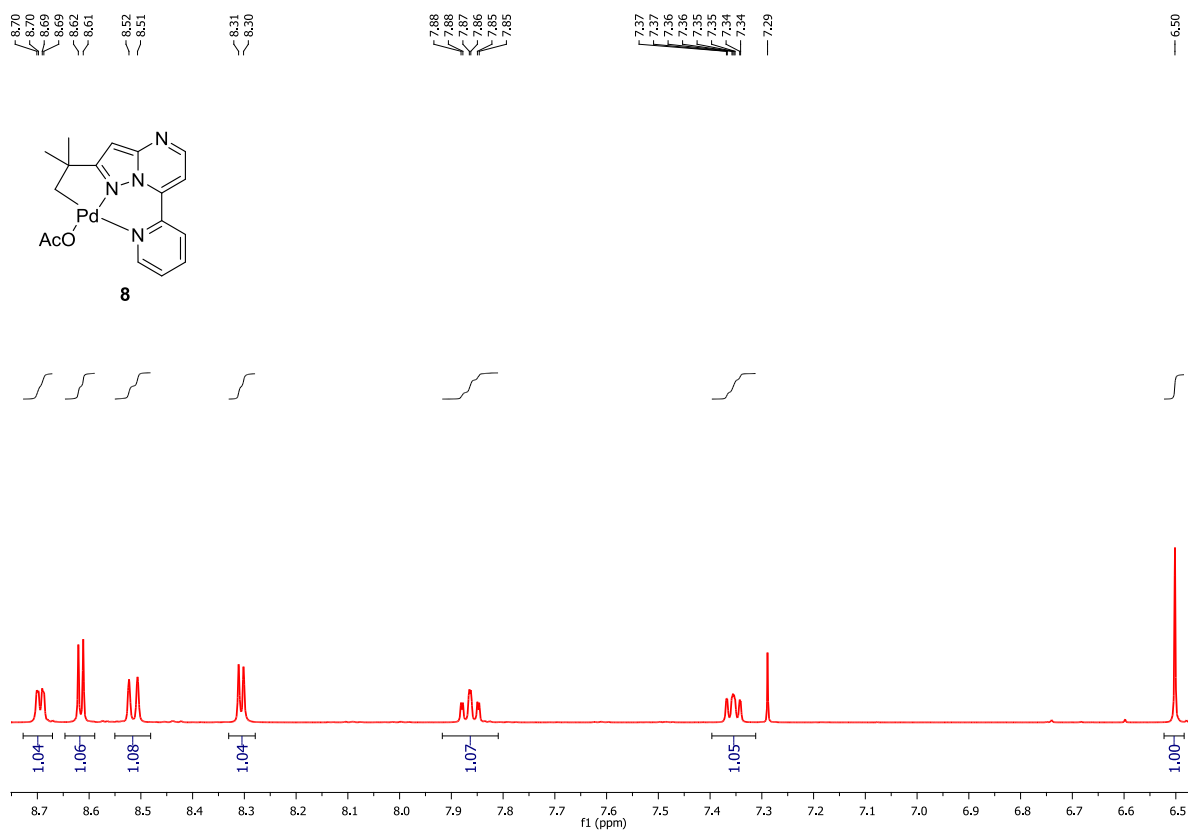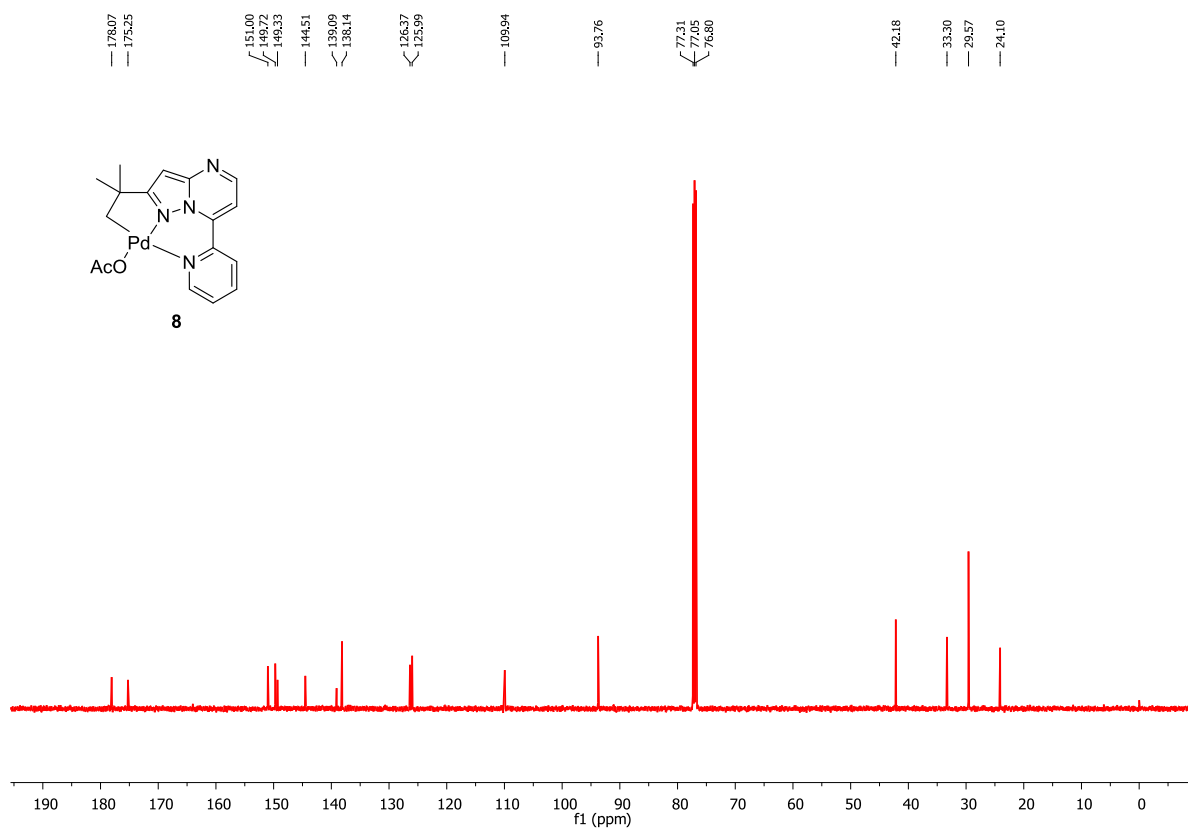

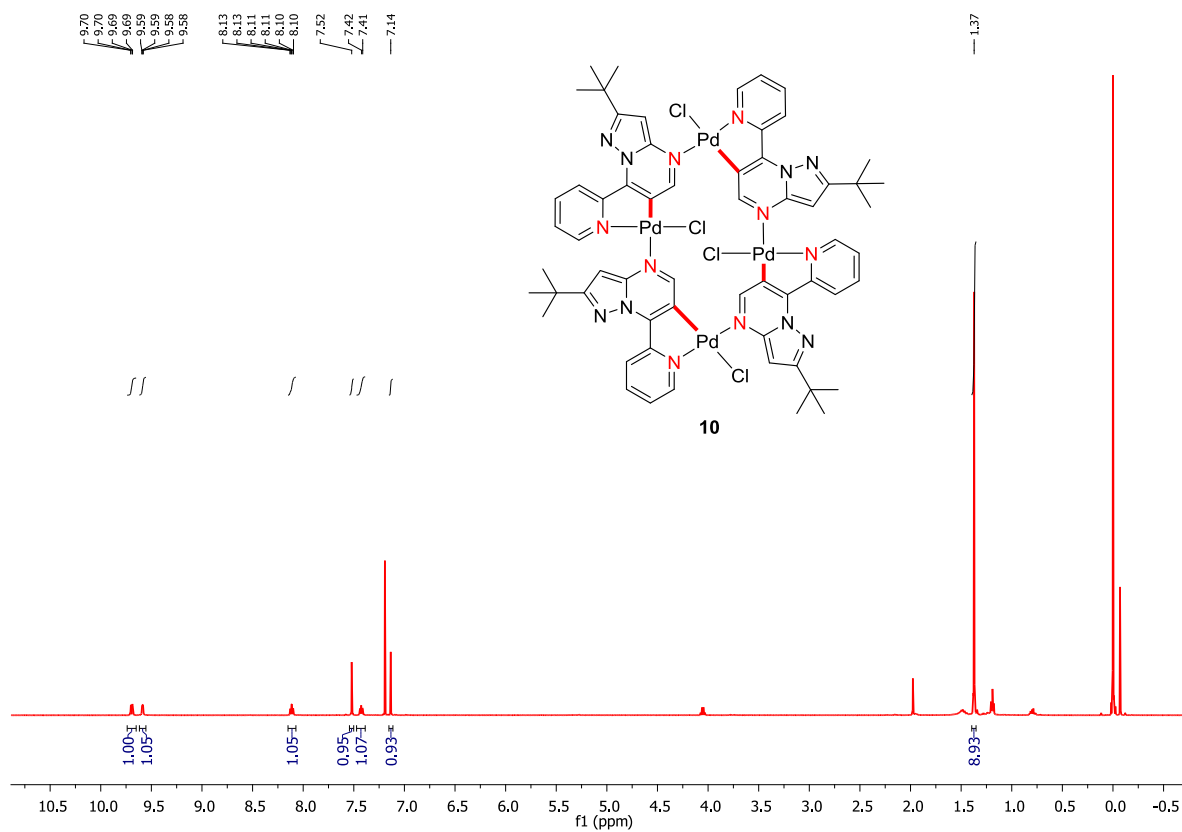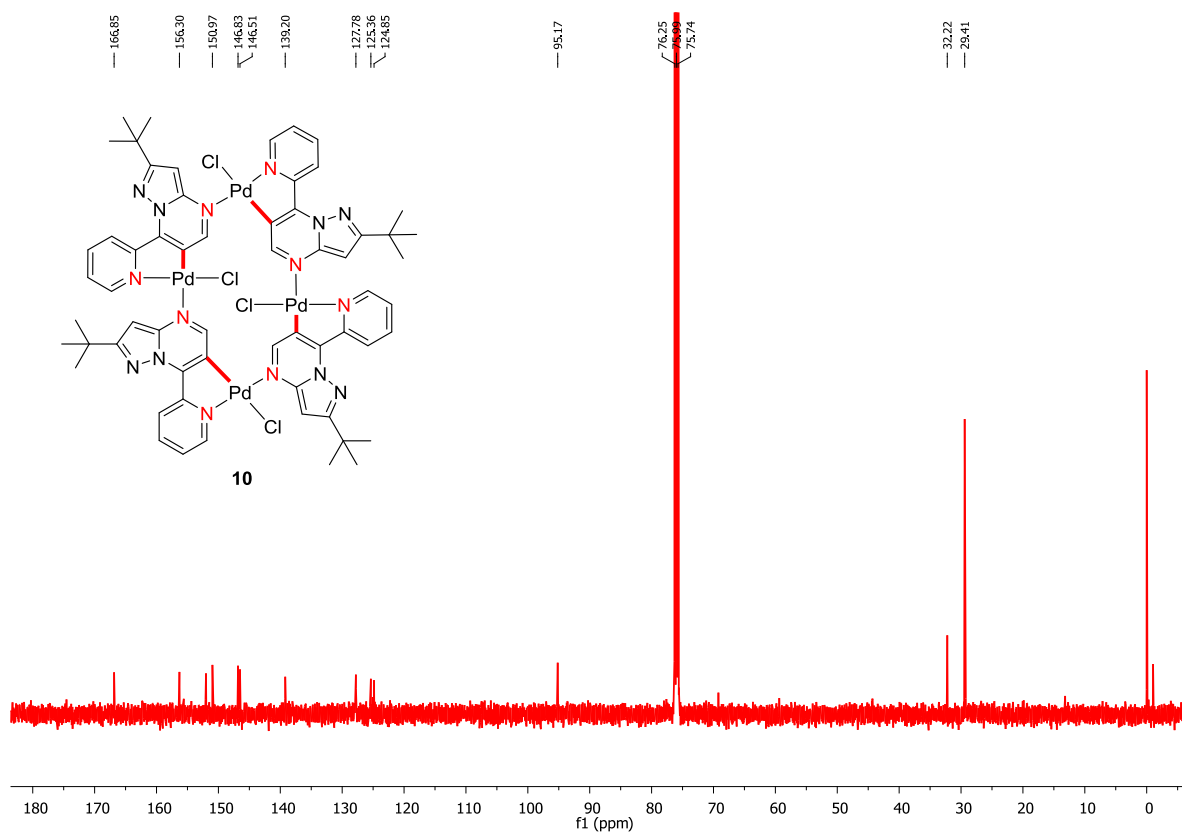

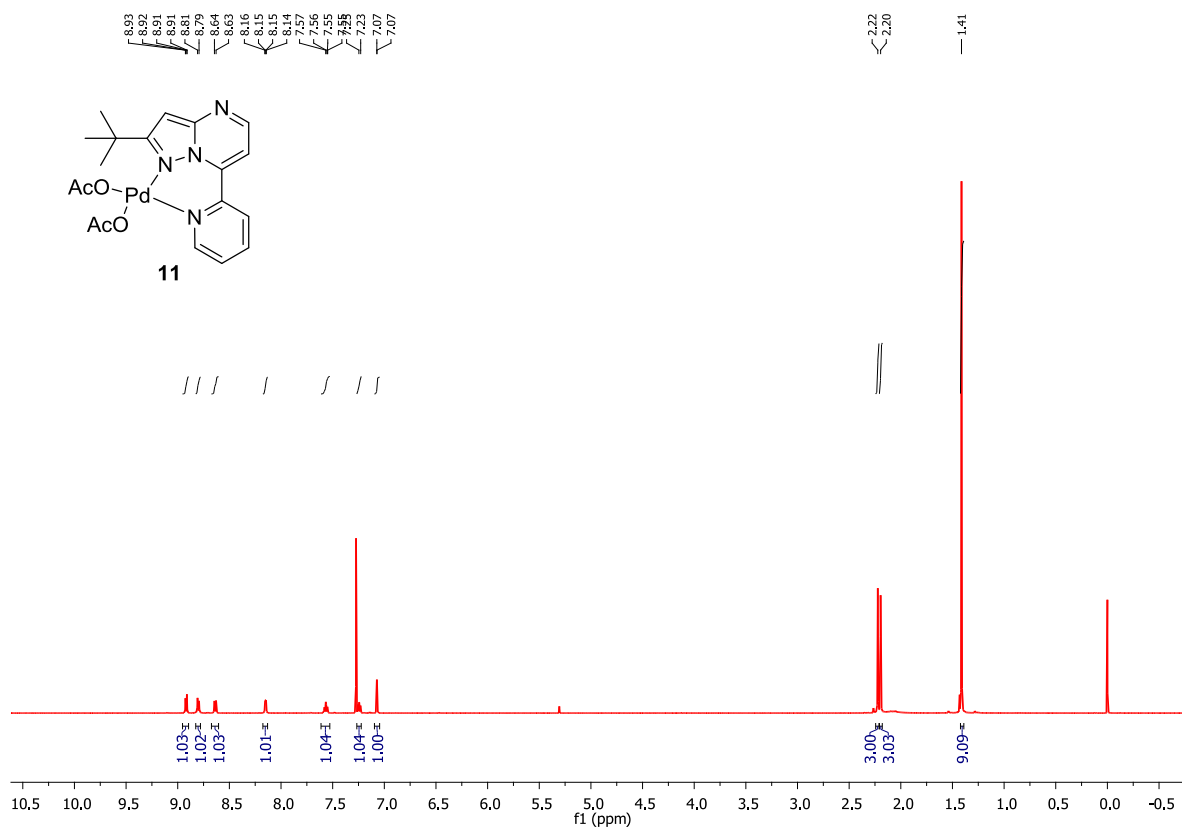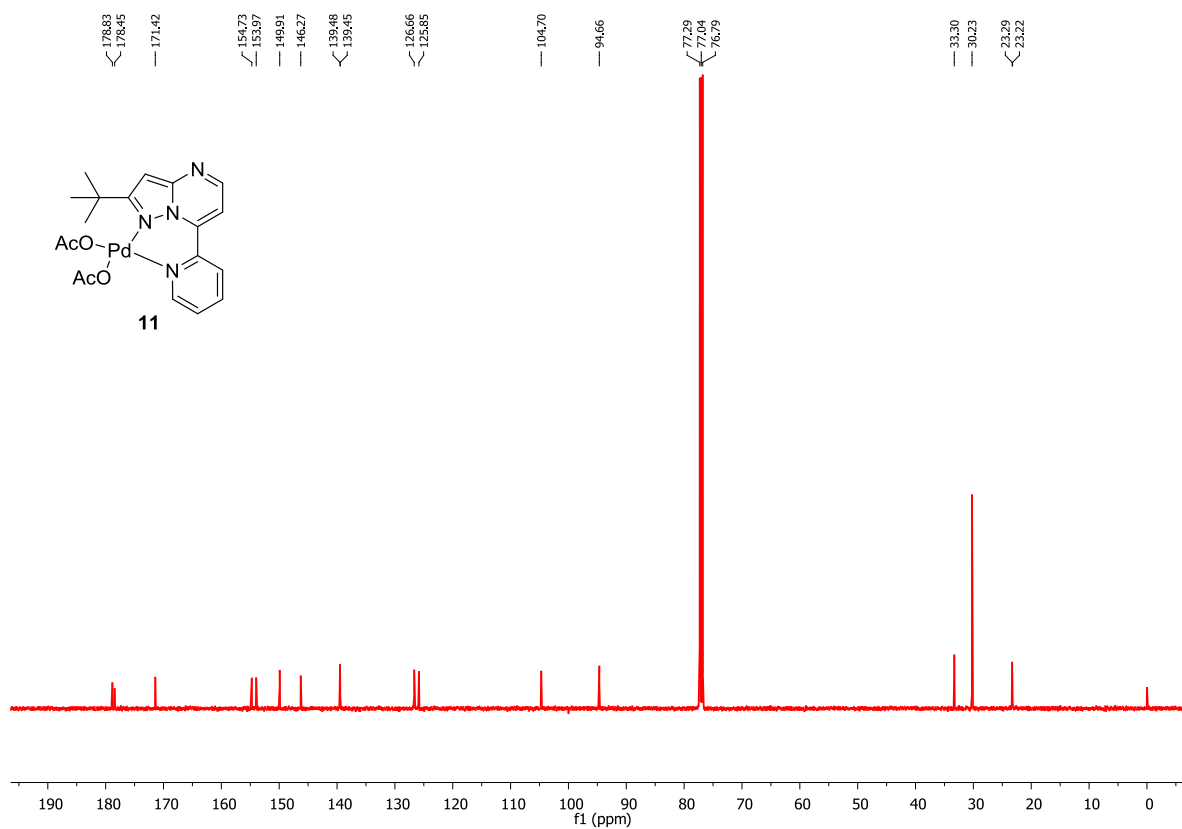

Supplement: d0sc02328k1.pdf [file d0sc02328k1.pdf]
